# Supplementary material for: Maternal Low-Protein Diet during Puberty and Adulthood Aggravates Lipid Metabolism of Their Offspring Fed a High-Fat Diet in Mice
Source: MDPI journal article supplement (doi:10.3390/nu14194057), 2022-09-29
Supplement: s1 [file s1]

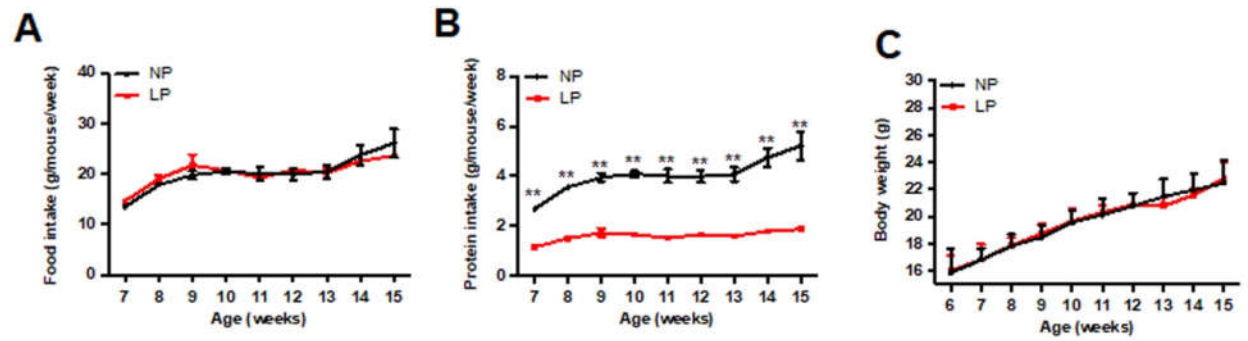

**Figure S1.** Effect of low protein diet on food intake, protein intake, and body weight in mothers. Female mice were fed with low-protein diet for 11 weeks or normal protein diet. The food intake and body weight were recorded weekly. (A) Food intake. (B) Calculated protein intake. (C) Body weight. ( $N = 12$  for each group). Data were expressed as Mean  $\pm$  SE.  $**P < 0.01$ .

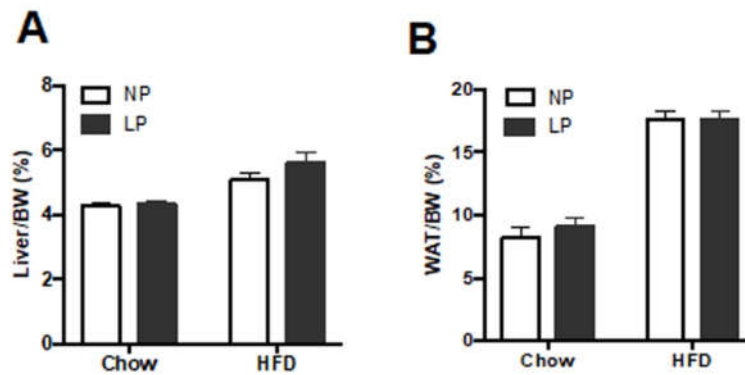

**Figure S2.** Effect of maternal low-protein diet on liver and white adipose tissue weight in the offspring. (A) Liver weight index. (B) White adipose tissue weight index.  $N = 7-9$  for each group. Data were expressed as Mean  $\pm$  SE.
