# Supplementary material for: Maternal Low-Protein Diet during Puberty and Adulthood Aggravates Lipid Metabolism of Their Offspring Fed a High-Fat Diet in Mice
Source: Nutrients. 2022 Sep 29;14(19):4057. doi: 10.3390/nu14194057 (PMC9570549; doi:10.3390/nu14194057)
Supplement: Supplementary file 1 [file nutrients-14-04057-s001.zip › supplemmentary tables 0907.xlsx]

## Sheet: table S1
			Table S1. The primers for RT-PCR
			Genes	Forward	Reverse
			Actb	GGCTGTATTCCCCTCCATCG	CCAGTTGGTAACAATGCCATGT
			Mup19	GCTCTATGGCCGAGAACCAG	TGGTGGAGTCCTGGTGAGAA
			Lpl	GGGAGTTTGGCTCCAGAGTTT	TGTGTCTTCAGGGGTCCTTAG
			Selp	CATCTGGTTCAGTGCTTTGATCT	ACCCGTGAGTTATTCCATGAGT
			Cyp7a1	GGGATTGCTGTGGTAGTGAGC	GGTATGGAATCAACCCGTTGTC
			Cyp2d69	TGTAGTCTTGGTGCTTTGTCTG	ACAATAGGCTGTGAGCCAAAATA
			Flt1	CACTGACATACCCAAACTTGTGC	GTCCCATGTTATTCTTTGCCCAT
			Cidea	TGACATTCATGGGATTGCAGAC	GGCCAGTTGTGATGACTAAGAC
			Fgf1	CAGCTCAGTGCGGAAAGTG	TGTCTGCGAGCCGTATAAAAG
			Acsl1	TGCCAGAGCTGATTGACATTC	GGCATACCAGAAGGTGGTGAG
			Stard6	AATTGCCCAACAAACTGCTGA	AATTGCCCAACAAACTGCTGA
			Ccl21a	TTCACGGTCCAACTCACAGG	CAGCTCCGCCAGGTAAGAAA

## Sheet: table S2
Table S2. The gene expression identified by transcriptome analysis
gene_id	gene_name	LP1	LP2	LP3	LP4	NP1	NP2	NP3	NP4	LP AVE	NP AVE	log2FoldChange	pvalue
ENSMUSG00000024526	Cidea	668.828	554.201	629.666	878.568	336.477	483.022	331.925	295.734	682.816	361.79	0.913825	5.98012e-07
ENSMUSG00000094345	Igkv14-126	5.50929	2.88146	1.68135	30.6732	0	0	0	0	10.1863	0	5.78329	3.80445e-05
ENSMUSG00000078673	Mup19	23.139	44.1824	52.1219	14.2411	39.7414	148.127	429.608	2320.66	33.4211	734.534	-4.45605	6.49696e-05
ENSMUSG00000076617	Ighm	327.252	238.201	266.494	417.375	213.72	128.806	211.315	157.644	312.33	177.871	0.80912	0.000144681
ENSMUSG00000031884	Ces2d-ps	51.7874	39.38	1.68135	10.9547	5.29885	3.68017	2.99031	0	25.9509	2.99233	3.06627	0.000215889
ENSMUSG00000038725	Pkhd1l1	34.1576	32.6566	31.9457	23.0049	16.7797	10.1205	11.9612	6.11022	30.4412	11.2429	1.41324	0.000287829
ENSMUSG00000074639	Rdh16f2	1133.81	1360.05	1170.22	1122.86	1491.63	1503.35	1550.97	1745.08	1196.74	1572.76	-0.393166	0.000305412
ENSMUSG00000074527	Gm14296	8.81487	7.6839	7.56608	14.2411	39.7414	19.3209	12.958	63.5463	9.5765	33.8916	-1.82361	0.00033558
ENSMUSG00000062328	Rpl17	1021.42	826.019	739.795	1859.02	615.55	716.713	611.02	645.239	1111.56	647.131	0.779676	0.000810167
ENSMUSG00000025887	Casp12	53.9911	61.4712	73.1388	55.869	29.1437	33.1215	34.887	41.5495	61.1175	34.6754	0.833291	0.000909965
ENSMUSG00000050533	Gm9845	46.2781	38.4195	11.7695	74.4921	14.1303	19.3209	10.9645	15.8866	42.7398	15.0755	1.49386	0.00131202
ENSMUSG00000025353	Ormdl2	495.836	438.943	443.877	441.475	663.239	540.985	567.162	581.693	455.033	588.27	-0.371726	0.00140299
ENSMUSG00000022129	Dct	45.1762	74.918	61.3694	43.8189	73.3008	94.7644	144.532	92.8753	56.3206	101.368	-0.840642	0.0014237
ENSMUSG00000076613	Ighg2b	55.0929	49.9454	51.2812	62.4419	59.1705	112.245	78.7449	166.198	54.6904	104.09	-0.922734	0.00158138
ENSMUSG00000024694	Keg1	1064.4	1067.1	1465.3	1163.39	1385.65	1339.58	2215.82	2236.34	1190.05	1794.35	-0.591433	0.0016284
ENSMUSG00000018623	Mmp7	28.6483	46.1034	58.8473	6.57283	7.06513	14.7207	11.9612	10.9984	35.043	11.1864	1.65841	0.00164956
ENSMUSG00000066607	6030419C18Rik	46.2781	22.0912	41.1931	53.6781	17.6628	28.5213	7.97416	12.2204	40.8101	16.5947	1.28016	0.00176269
ENSMUSG00000061848	Gm5805	195.029	200.742	233.708	139.125	314.398	264.972	237.231	303.067	192.151	279.917	-0.538648	0.0022506
ENSMUSG00000002831	Plin4	1671.52	1520.45	1577.95	2115.36	1095.1	1523.59	1229.02	1284.37	1721.32	1283.02	0.423612	0.00295883
ENSMUSG00000022797	Tfrc	493.633	502.335	396.799	407.515	491.027	556.626	871.177	680.678	450.071	649.877	-0.529504	0.00306253
ENSMUSG00000008845	Cd163	538.809	431.259	353.084	323.164	517.521	546.505	554.204	743.002	411.579	590.308	-0.519638	0.00364217
ENSMUSG00000053553	3110082I17Rik	69.4171	84.5229	97.5184	101.879	99.795	103.965	166.461	255.407	88.3343	156.407	-0.816546	0.00368102
ENSMUSG00000072940	Gm10443	214.862	262.213	224.461	269.486	173.096	170.208	183.406	199.193	242.756	181.476	0.422066	0.00369977
ENSMUSG00000001168	Oas1h	3.30558	0.960488	9.24744	2.19094	0	0	0	0	3.92611	0	4.4357	0.00386393
ENSMUSG00000024292	Cyp4f14	1818.07	1718.31	1878.07	2049.63	2418.93	2035.13	2336.43	2407.43	1866.02	2299.48	-0.301304	0.00386779
ENSMUSG00000078687	Mup8	0	2.88146	3.3627	2.19094	1.76628	4.60021	6.97739	47.6597	2.10878	15.2509	-2.80167	0.00391153
ENSMUSG00000113310	CT009546.1	6.61115	9.60488	0.840676	3.28641	0	0	0.99677	0	5.08578	0.249193	4.06455	0.00394414
ENSMUSG00000027574	Nkain4	19.8335	33.6171	19.3355	19.7185	16.7797	2.76013	4.98385	8.5543	23.1261	8.26949	1.47574	0.00409023
ENSMUSG00000112762	4930459C07Rik	14.3242	26.8937	11.7695	9.85924	4.41571	7.36034	5.98062	1.22204	15.7116	4.74468	1.69672	0.00426377
ENSMUSG00000070369	Itgad	3.30558	7.6839	6.72541	8.76377	0	0.920043	1.99354	0	6.61966	0.728396	3.16242	0.00446226
ENSMUSG00000021118	Plek2	11.0186	1.92098	10.0881	2.19094	27.3774	10.1205	26.9128	15.8866	6.30465	20.0743	-1.66503	0.00451853
ENSMUSG00000084067	Gm14269	16.5279	24.9727	22.6983	21.9094	22.9617	64.403	50.8353	35.4393	21.5271	43.4098	-1.00902	0.00498258
ENSMUSG00000104030	5330406M23Rik	7.71301	8.64439	3.3627	7.6683	0	0	2.99031	0	6.8471	0.747578	3.19036	0.00528208
ENSMUSG00000106375	Gm43361	5.50929	9.60488	4.20338	8.76377	0	1.84009	1.99354	0	7.02033	0.958406	2.83124	0.00541609
ENSMUSG00000072676	Tmem254a	2.20372	0.960488	2.52203	0	15.0134	7.36034	0.99677	13.4425	1.42156	9.20325	-2.65871	0.0056583
ENSMUSG00000040592	Cd79b	34.1576	47.0639	53.8033	35.0551	23.8448	26.6812	27.9096	12.2204	42.52	22.664	0.89926	0.00572258
ENSMUSG00000095320	Ccl21a	48.4818	22.0912	20.1762	15.3366	2.64942	6.4403	7.97416	20.7747	26.5215	9.45966	1.52625	0.0058866
ENSMUSG00000026158	Ogfrl1	188.418	228.596	201.762	194.994	225.201	241.971	309.996	353.171	203.443	282.585	-0.468969	0.00608919
ENSMUSG00000039814	Xkr5	5.50929	3.84195	1.68135	2.19094	0	0	0	0	3.30588	0	4.16265	0.00615175
ENSMUSG00000095134	Mid1-ps1	12.1204	3.84195	9.24744	4.38189	8.83142	13.8006	39.8708	24.4409	7.39793	21.7359	-1.54733	0.00647239
ENSMUSG00000032484	Ngp	0	9.60488	6.72541	2.19094	7.06513	24.8412	13.9548	21.9968	4.63031	16.9645	-1.82879	0.0066247
ENSMUSG00000036585	Fgf1	2903.4	2722.02	2569.11	2154.79	3495.47	2875.13	3052.11	3789.56	2587.33	3303.07	-0.35206	0.00679569
ENSMUSG00000109724	Gm18194	7.71301	7.6839	10.9288	6.57283	22.9617	20.2409	14.9516	18.3306	8.22463	19.1212	-1.20655	0.00685453
ENSMUSG00000042248	Cyp2c37	4333.61	4593.05	3771.27	3773.9	5683.9	3850.38	6158.05	6255.64	4117.96	5486.99	-0.413965	0.00732037
ENSMUSG00000016194	Hsd11b1	11994.8	11403.9	10365.5	10639.2	14501.2	11836.3	12984.9	14736.6	11100.9	13514.8	-0.283853	0.00733147
ENSMUSG00000074782	4833422C13Rik	24.2409	25.9332	18.4949	30.6732	42.3908	34.0416	49.8385	45.2156	24.8355	42.8716	-0.794	0.00735668
ENSMUSG00000029821	Gsdme	175.196	161.362	144.596	131.457	116.575	108.565	95.69	124.648	153.153	111.37	0.461274	0.00736179
ENSMUSG00000092008	Cyp2c69	3.30558	5.76293	1.68135	1.09547	17.6628	7.36034	21.9289	2.44409	2.96133	12.3491	-2.07074	0.00754758
ENSMUSG00000030934	Oat	25980.7	28937.6	31311.8	31606.5	36893.2	29516.8	41201.5	42755.6	29459.2	37591.8	-0.351662	0.00757584
ENSMUSG00000047728	BC025446	2028.52	2152.45	2232.84	1800.96	2446.3	2233.86	2677.33	2761.82	2053.69	2529.83	-0.300021	0.00796645
ENSMUSG00000022543	4930451G09Rik	6.61115	5.76293	3.3627	5.47736	14.1303	13.8006	8.97093	20.7747	5.30354	14.4191	-1.44922	0.00809778
ENSMUSG00000037280	Galnt6	84.8431	63.3922	78.1829	69.0147	50.3391	48.7623	55.8191	40.3274	73.8582	48.812	0.591391	0.00825894
ENSMUSG00000022347	A1bg	0	2.88146	1.68135	4.38189	9.71456	9.20043	18.9386	2.44409	2.23618	10.0744	-2.1869	0.00842727
ENSMUSG00000038576	Susd4	187.316	191.137	293.396	290.3	331.178	255.772	345.879	514.48	240.537	361.827	-0.585432	0.00864757
ENSMUSG00000096674	Mup15	1.10186	3.84195	2.52203	9.85924	6.18199	6.4403	10.9645	47.6597	4.33127	17.8116	-2.03428	0.00867034
ENSMUSG00000040268	Plekha1	521.179	470.639	397.64	546.64	287.904	432.42	388.74	340.95	484.025	362.504	0.415352	0.00895574
ENSMUSG00000104776	Gm43691	3.30558	10.5654	2.52203	12.0502	1.76628	0	0	2.44409	7.11079	1.05259	2.80986	0.00906654
ENSMUSG00000097690	4930505N22Rik	0	0	0	0	5.29885	0	3.98708	4.88817	0	3.54353	-4.271	0.00915758
ENSMUSG00000034593	Myo5a	62.8059	59.5502	90.793	41.6279	32.6762	34.9616	50.8353	32.9952	63.6943	37.8671	0.757166	0.00924499
ENSMUSG00000105703	Gm43305	374.632	336.171	522.901	593.746	495.442	563.066	1626.73	2210.68	456.862	1223.98	-1.42144	0.00934455
ENSMUSG00000004952	Rasa4	157.566	131.587	185.789	151.175	119.224	105.805	132.57	94.0973	156.529	112.924	0.469526	0.00960162
ENSMUSG00000032575	Manf	1594.39	1648.2	1312.3	1664.02	1644.41	1718.64	2095.21	3857.99	1554.73	2329.06	-0.582602	0.00988456
ENSMUSG00000029915	Clec5a	7.71301	18.2493	21.8576	19.7185	6.18199	7.36034	7.97416	6.11022	16.8846	6.90668	1.29621	0.0102593
ENSMUSG00000086212	Mkln1os	24.2409	21.1307	23.5389	19.7185	10.5977	8.28038	13.9548	10.9984	22.1573	10.9578	1.02158	0.0103828
ENSMUSG00000046070	Igfals	1830.19	1630.91	2137	1641.02	2785.43	2154.74	2353.37	1963.82	1809.78	2314.34	-0.354876	0.0104092
ENSMUSG00000086746	Gm15222	1.10186	5.76293	1.68135	2.19094	7.06513	10.1205	12.958	8.5543	2.68427	9.67448	-1.83796	0.0104872
ENSMUSG00000039364	Sectm1b	0	0.960488	8.40676	5.47736	0	0	0	0	3.71115	0	4.34994	0.0105004
ENSMUSG00000073565	Prr16	583.985	575.332	601.924	508.299	687.084	657.831	657.868	768.665	567.385	692.862	-0.286077	0.0107501
ENSMUSG00000058600	Rpl30	1952.49	1955.55	2133.64	1683.74	2842.83	2537.48	2241.74	2064.03	1931.36	2421.52	-0.3265	0.0108251
ENSMUSG00000037953	A4gnt	12.1204	17.2888	16.8135	21.9094	12.364	4.60021	6.97739	1.22204	17.033	6.29091	1.39489	0.011073
ENSMUSG00000024697	Gna14	60.6022	59.5502	87.4303	105.165	141.303	92.0043	112.635	124.648	78.187	117.648	-0.589046	0.0110982
ENSMUSG00000101389	Ms4a4a	23.139	18.2493	33.627	9.85924	4.41571	14.7207	8.97093	6.11022	21.2186	8.55439	1.31217	0.0111482
ENSMUSG00000019927	Ube2d1	175.196	172.888	182.427	161.034	113.925	153.647	127.587	128.315	172.886	130.868	0.402695	0.011208
ENSMUSG00000033066	Gas7	214.862	212.268	186.63	219.094	145.718	193.209	125.593	156.422	208.214	155.235	0.421098	0.0114532
ENSMUSG00000054263	Lifr	1391.65	1180.44	1370.3	1349.62	1337.96	1334.06	2163.99	2745.93	1323	1895.49	-0.518052	0.0117625
ENSMUSG00000031767	Nudt7	3141.4	3369.39	4715.35	4382.98	4746	3708.69	5940.75	8175.47	3902.28	5642.73	-0.531781	0.0118485
ENSMUSG00000064215	Ifi27	4105.53	3500.02	4225.24	3973.28	4901.44	4096.03	4949.96	5280.45	3951.01	4806.97	-0.282696	0.0118895
ENSMUSG00000027907	S100a11	361.41	373.63	409.409	409.706	267.592	389.178	271.122	189.417	388.539	279.327	0.472751	0.0119332
ENSMUSG00000112449	Srp54a	42.9725	47.0639	61.3694	40.5324	41.5077	56.1226	96.6867	173.53	47.9845	91.9618	-0.925484	0.0120313
ENSMUSG00000020484	Xbp1	3974.4	3372.27	3674.6	3234.93	3883.17	3969.98	4561.22	6473.16	3564.05	4721.89	-0.405492	0.0120362
ENSMUSG00000040322	Slc25a24	67.2134	63.3922	64.7321	67.9192	37.9751	43.242	54.8224	40.3274	65.8142	44.0917	0.576883	0.0120913
ENSMUSG00000043461	Sptssb	0	17.2888	13.4508	1.09547	0	0	0.99677	2.44409	7.95877	0.860214	3.34189	0.0122075
ENSMUSG00000086712	AI427809	13.2223	14.4073	19.3355	12.0502	4.41571	8.28038	7.97416	2.44409	14.7538	5.77859	1.33788	0.0123195
ENSMUSG00000072625	Gdf2	361.41	321.763	446.399	311.114	449.519	445.301	479.447	464.376	360.171	459.661	-0.349111	0.0126415
ENSMUSG00000094162	Ccl19-ps3	2.20372	2.88146	0	1.09547	5.29885	5.52026	5.98062	12.2204	1.54516	7.25504	-2.24831	0.0127425
ENSMUSG00000027938	Creb3l4	13.2223	9.60488	14.2915	6.57283	3.53257	5.52026	2.99031	2.44409	10.9229	3.62181	1.57829	0.012836
ENSMUSG00000076614	Ighg1	18.7316	33.6171	10.0881	55.869	43.2739	62.5629	68.7772	271.294	29.5765	111.477	-1.91485	0.012925
ENSMUSG00000028240	Cyp7a1	2464.86	3464.48	2447.21	2250.1	1374.17	2350.71	2383.28	1162.16	2656.66	1817.58	0.547336	0.0130924
ENSMUSG00000024542	Cep192	84.8431	87.4044	83.2269	93.1151	38.8582	46.0021	83.7287	59.8801	87.1474	57.1173	0.615151	0.0132996
ENSMUSG00000024538	Ppic	99.1673	128.705	123.579	121.597	93.613	83.7239	95.69	68.4344	118.262	85.3653	0.46649	0.0133653
ENSMUSG00000006517	Mvd	144.343	162.322	126.942	165.416	237.565	206.09	232.247	144.201	149.756	205.026	-0.459685	0.0134495
ENSMUSG00000020738	Sumo2	119.001	72.9971	71.4575	66.8238	169.563	56.1226	594.075	227.3	82.5698	261.765	-1.66489	0.0134661
ENSMUSG00000020297	Nsg2	2.20372	2.88146	5.04406	1.09547	0	0	0	0	2.80618	0	3.95132	0.0134822
ENSMUSG00000056481	Cd248	31.9539	29.7751	33.627	30.6732	24.728	15.6407	12.958	17.1086	31.5073	17.6088	0.83301	0.0136469
ENSMUSG00000035780	Ugt2a3	3701.14	3664.26	4002.46	3708.17	4424.54	3734.45	5136.36	5394.1	3769.01	4672.36	-0.309605	0.0138919
ENSMUSG00000032231	Anxa2	1355.29	1510.85	1505.65	1899.55	1113.64	1482.19	1259.92	866.429	1567.83	1180.54	0.408362	0.0139325
ENSMUSG00000048538	Gm9826	2106.75	1787.47	2058.82	1574.19	2618.52	2191.54	2199.87	2266.89	1881.81	2319.2	-0.301461	0.0145126
ENSMUSG00000043773	1700048O20Rik	4.40743	3.84195	1.68135	2.19094	6.18199	10.1205	11.9612	9.77635	3.03042	9.51001	-1.66359	0.0147828
ENSMUSG00000083396	Gm15542	308.52	326.566	290.874	291.395	370.919	302.694	435.589	472.931	304.339	395.533	-0.37544	0.0152343
ENSMUSG00000027454	Gins1	44.0743	47.0639	73.9795	65.7283	105.094	67.1631	95.69	80.6549	57.7115	87.1504	-0.591156	0.0154385
ENSMUSG00000028664	Ephb2	291.993	112.377	158.047	269.486	126.289	189.529	101.671	80.6549	207.976	124.536	0.733474	0.0154582
ENSMUSG00000019906	Lin7a	309.622	310.238	295.077	360.41	397.414	320.175	454.527	469.265	318.837	410.345	-0.363025	0.0157013
ENSMUSG00000065489	Mir365-2	5.50929	0.960488	3.3627	9.85924	0	0	0.99677	1.22204	4.92293	0.554703	3.26914	0.0157164
ENSMUSG00000023905	Tnfrsf12a	467.188	329.447	306.847	351.646	287.904	332.135	242.215	200.415	363.782	265.667	0.44845	0.0157238
ENSMUSG00000024378	Stard4	747.06	924.95	937.354	850.086	1005.9	932.923	1269.89	1102.28	864.862	1077.75	-0.31621	0.0157347
ENSMUSG00000060560	Ces4a	8.81487	6.72341	9.24744	13.1457	9.71456	15.6407	18.9386	48.8817	9.48284	23.2939	-1.28026	0.0157493
ENSMUSG00000109119	Gm44752	2.20372	1.92098	4.20338	2.19094	0	0	0	0	2.62975	0	3.85126	0.0158568
ENSMUSG00000087484	2900089D17Rik	51.7874	40.3405	43.7152	76.683	45.0402	28.5213	18.9386	30.5511	53.1315	30.7628	0.777209	0.0161171
ENSMUSG00000021135	Slc10a1	12495.1	12233.7	10291.6	12248.5	12612.1	13818.1	14957.5	14940.7	11817.2	14082.1	-0.252993	0.0161643
ENSMUSG00000024131	Slc3a1	663.319	598.384	300.121	576.218	582.873	690.032	790.439	1077.84	534.511	785.297	-0.555193	0.0165247
ENSMUSG00000023176	Cpn2	5864.09	5215.45	5124.76	5259.36	5674.19	6231.45	6372.35	7549.78	5365.92	6456.94	-0.266862	0.0169665
ENSMUSG00000027075	Slc43a1	52.8892	51.8663	45.3965	38.3415	62.7031	39.5618	94.6932	122.204	47.1234	79.7906	-0.750474	0.0170436
ENSMUSG00000020649	Rrm2	82.6394	99.8907	100.04	79.9694	61.8199	83.7239	44.8547	57.436	90.635	61.9586	0.54748	0.0172246
ENSMUSG00000081070	Gm13181	2.20372	0.960488	7.56608	3.28641	0	0	0.99677	0	3.50418	0.249193	3.55034	0.0173402
ENSMUSG00000099889	Mrgprb11-ps	79.3338	114.298	85.749	105.165	71.5345	78.2036	36.8805	68.4344	96.1365	63.7633	0.590761	0.0173825
ENSMUSG00000054827	Cyp2c50	4634.42	6151.92	6378.21	5912.26	8250.31	5058.39	8277.18	9063.89	5769.2	7662.44	-0.409256	0.0179182
ENSMUSG00000059060	Rad51b	381.243	419.733	369.057	488.58	309.983	404.819	286.073	272.516	414.653	318.348	0.378109	0.0179199
ENSMUSG00000006154	Eps8l1	159.77	107.575	62.21	46.0098	52.9885	35.8817	44.8547	76.9887	93.891	52.6784	0.838307	0.0180056
ENSMUSG00000028410	Dnaja1	7992.88	7987.42	7368.53	7742.79	8335.97	8311.67	9797.26	12128.8	7772.9	9643.42	-0.310929	0.0180608
ENSMUSG00000022995	Enah	44.0743	26.8937	39.5118	26.2913	19.4291	26.6812	13.9548	17.1086	34.1928	19.2934	0.818654	0.0185172
ENSMUSG00000070811	Sult2a2	6.61115	2.88146	1.68135	2.19094	0	0	0.99677	0	3.34123	0.249193	3.45181	0.0188726
ENSMUSG00000071177	Serpina1d	26712.4	29129.7	26092.1	28728.7	30313	28203.9	36162.8	46399.8	27665.7	35269.9	-0.350293	0.0189774
ENSMUSG00000049436	Upk1b	25.3428	16.3283	11.7695	12.0502	13.2471	5.52026	2.99031	3.66613	16.3727	6.35596	1.32677	0.0192658
ENSMUSG00000032115	Hyou1	2072.6	1782.67	1462.78	2075.92	1918.18	2068.26	2258.68	4618.1	1848.49	2715.81	-0.55473	0.0193016
ENSMUSG00000034110	Kctd7	51.7874	40.3405	60.5287	51.4872	81.249	71.7633	73.761	65.9903	51.0359	73.1909	-0.520786	0.0194254
ENSMUSG00000045094	Arhgef37	154.26	141.192	168.135	167.607	204.889	173.888	209.322	218.746	157.799	201.711	-0.351583	0.0194328
ENSMUSG00000070942	Il1rl2	15.426	14.4073	18.4949	7.6683	7.94827	8.28038	2.99031	2.44409	13.9991	5.41576	1.3423	0.0195979
ENSMUSG00000038599	Capn8	19.8335	24.0122	9.24744	14.2411	15.0134	10.1205	44.8547	102.652	16.8336	43.16	-1.34992	0.019647
ENSMUSG00000106443	Gm42702	1.10186	1.92098	6.72541	1.09547	0	0	0	0	2.71093	0	3.90912	0.0196738
ENSMUSG00000086332	4930480G23Rik	53.9911	64.3527	52.9626	66.8238	70.6513	84.6439	72.7642	122.204	59.5325	87.566	-0.549548	0.0197033
ENSMUSG00000028051	Hcn3	1080.92	463.916	622.1	660.569	415.96	694.632	430.605	356.837	706.877	474.508	0.573315	0.0197587
ENSMUSG00000015568	Lpl	586.189	785.679	905.408	645.233	581.107	587.907	617.998	317.731	730.627	526.186	0.472598	0.0200722
ENSMUSG00000029177	Cenpa	73.8245	96.0488	88.271	89.8287	67.1188	57.9627	68.7772	57.436	86.9932	62.8237	0.468926	0.0202858
ENSMUSG00000028179	Cth	7778.02	7301.63	7244.11	6190.51	7693.05	7535.15	10014.6	9951.1	7128.57	8798.46	-0.303482	0.0204674
ENSMUSG00000028488	Sh3gl2	0	0	0	0	0	2.76013	2.99031	6.11022	0	2.96516	-3.99863	0.0207561
ENSMUSG00000078780	Gm5150	29.7502	37.459	38.6711	26.2913	12.364	28.5213	19.9354	13.4425	33.0429	18.5658	0.829232	0.0208432
ENSMUSG00000103502	9330121J05Rik	5.50929	2.88146	6.72541	3.28641	10.5977	11.0405	9.9677	15.8866	4.60064	11.8731	-1.34298	0.020858
ENSMUSG00000079083	Jrkl	89.2506	78.76	82.3863	56.9645	50.3391	43.242	67.7804	48.8817	76.8403	52.5608	0.550298	0.0209208
ENSMUSG00000027579	Srms	13.2223	18.2493	10.9288	26.2913	11.4808	6.4403	4.98385	7.33226	17.1729	7.55931	1.16575	0.0210992
ENSMUSG00000085819	Ube4bos1	12.1204	3.84195	4.20338	6.57283	1.76628	0	1.99354	2.44409	6.68465	1.55098	2.13235	0.021166
ENSMUSG00000028496	Mllt3	69.4171	64.3527	71.4575	63.5374	37.0919	45.0821	60.803	41.5495	67.1911	46.1316	0.544268	0.0212268
ENSMUSG00000062991	Nrg1	66.1115	42.2615	33.627	59.1555	22.9617	43.242	29.9031	23.2188	50.2889	29.8314	0.738604	0.021242
ENSMUSG00000071178	Serpina1b	78594.5	96511.7	80683.9	89168.1	89630.9	96875.9	109522	129423	86239.5	106363	-0.30256	0.0216327
ENSMUSG00000026976	Pax8	5.50929	1.92098	1.68135	1.09547	6.18199	8.28038	9.9677	8.5543	2.55177	8.2461	-1.71589	0.0216566
ENSMUSG00000087136	Gm15864	4.40743	3.84195	0	3.28641	0	0	0	0	2.88395	0	3.96103	0.0219281
ENSMUSG00000027333	Smox	262.242	213.228	225.301	215.808	180.161	204.249	180.415	157.644	229.145	180.617	0.33881	0.0222846
ENSMUSG00000027661	Slc2a10	11.0186	4.80244	10.0881	13.1457	1.76628	3.68017	5.98062	1.22204	9.7637	3.16228	1.60439	0.0223193
ENSMUSG00000037493	Cib2	91.4543	84.5229	138.712	109.547	164.264	139.846	139.548	134.425	106.059	144.521	-0.443605	0.0223863
ENSMUSG00000083899	Gm12346	101.371	84.5229	66.4134	78.874	66.2356	117.765	146.525	179.64	82.7953	127.542	-0.620066	0.0225763
ENSMUSG00000067144	Slc22a7	191.723	161.362	258.088	208.14	308.216	189.529	369.802	669.68	204.828	384.307	-0.905992	0.0230232
ENSMUSG00000045629	Sh3tc2	34.1576	34.5776	42.0338	33.9596	22.0785	23.9211	24.9193	19.5527	36.1821	22.6179	0.677546	0.0231035
ENSMUSG00000023050	Map3k12	47.3799	43.2219	44.5558	43.8189	28.2605	27.6013	36.8805	23.2188	44.7441	28.9903	0.619978	0.0231223
ENSMUSG00000092075	Serpina4-ps1	15.426	8.64439	32.7864	27.3868	8.83142	23.9211	47.845	432.603	21.0609	128.3	-2.60445	0.0233877
ENSMUSG00000035725	Prkx	115.695	143.113	142.074	113.929	93.613	100.285	101.671	97.7635	128.703	98.3329	0.392929	0.0233954
ENSMUSG00000079015	Serpina1c	7890.41	10162	8327.74	8182.08	8764.3	8338.35	12675.9	18364.9	8640.55	12035.9	-0.478009	0.0235551
ENSMUSG00000040899	Ccr6	2.20372	3.84195	10.0881	3.28641	0.883142	1.84009	0	0	4.85505	0.680807	2.76783	0.0237661
ENSMUSG00000028427	Aqp7	35.2595	16.3283	23.5389	26.2913	7.06513	23.9211	10.9645	2.44409	25.3545	11.0987	1.16349	0.0238078
ENSMUSG00000080237	Gm14239	0	2.88146	0.840676	0	5.29885	0.920043	16.9451	2.44409	0.930535	6.40202	-2.73486	0.0240471
ENSMUSG00000039648	Kyat1	1162.46	1372.54	1225.71	1324.43	1555.21	1274.26	1544.99	1839.18	1271.28	1553.41	-0.288306	0.0244187
ENSMUSG00000100075	1700018L02Rik	61.7041	35.538	52.1219	36.1506	56.5211	55.2026	113.632	69.6565	46.3787	73.753	-0.667228	0.0244765
ENSMUSG00000026580	Selp	48.4818	62.4317	55.4846	51.4872	38.8582	32.2015	36.8805	41.5495	54.4713	37.3724	0.551097	0.0251128
ENSMUSG00000030382	Slc27a5	19153.6	17292.6	17694.6	19336.2	20873.9	19229.8	22039.6	22996.4	18369.2	21284.9	-0.212527	0.0252378
ENSMUSG00000018379	Srsf1	73.8245	63.3922	60.5287	64.6328	68.0019	58.8827	215.302	102.652	65.5946	111.21	-0.760926	0.0256769
ENSMUSG00000019579	Mydgf	1396.05	1406.15	1351.81	1470.12	1776	1600.87	1468.24	1709.64	1406.03	1638.69	-0.221132	0.0257405
ENSMUSG00000056665	Them6	291.993	215.149	261.45	289.204	235.799	215.29	201.348	174.752	264.449	206.797	0.349285	0.0260457
ENSMUSG00000004552	Ctse	57.2967	46.1034	69.7761	62.4419	31.7931	46.9222	42.8611	37.8833	58.9045	39.8649	0.56525	0.0260864
ENSMUSG00000062157	Ifnlr1	6.61115	11.5259	7.56608	9.85924	1.76628	0.920043	1.99354	7.33226	8.89058	3.00303	1.64582	0.026164
ENSMUSG00000030711	Sult1a1	7730.64	8220.81	6112.56	6002.09	8252.96	8728.44	7720.98	9726.24	7016.52	8607.16	-0.29473	0.0261845
ENSMUSG00000038174	Fam126b	576.272	552.28	532.989	589.364	480.429	629.309	902.077	1092.51	562.726	776.081	-0.462343	0.0264029
ENSMUSG00000090555	Gm8893	267.752	428.378	295.077	315.496	377.101	363.417	441.569	549.919	326.676	433.002	-0.403575	0.0264297
ENSMUSG00000112249	Gm30262	262.242	212.268	199.24	167.607	242.864	214.37	293.05	425.271	210.339	293.889	-0.479166	0.0264418
ENSMUSG00000082039	Gm15653	4.40743	0.960488	3.3627	3.28641	14.1303	3.68017	8.97093	9.77635	3.00426	9.13943	-1.61703	0.0264888
ENSMUSG00000028195	Cyr61	236.9	247.806	217.735	254.149	234.033	152.727	181.412	175.974	239.147	186.037	0.359116	0.0265207
ENSMUSG00000105512	Gm43714	16.5279	14.4073	10.0881	24.1004	25.6111	28.5213	32.8934	25.6629	16.2809	28.1722	-0.810336	0.0268474
ENSMUSG00000115111	AC139758.2	4.40743	3.84195	0	5.47736	0.883142	0	0	0	3.43169	0.220785	3.48696	0.02687
ENSMUSG00000103138	Gm2238	8.81487	3.84195	2.52203	8.76377	0	0.920043	2.99031	1.22204	5.98566	1.2831	2.23386	0.0269939
ENSMUSG00000057880	Abat	8508.55	8712.58	9687.95	8105.39	10295.7	10172.9	9665.68	10051.3	8753.62	10046.4	-0.198601	0.027247
ENSMUSG00000040998	Npnt	40.7688	24.9727	23.5389	48.2007	16.7797	25.7612	17.9419	18.3306	34.3703	19.7034	0.78854	0.0273399
ENSMUSG00000023345	Poc1a	50.6855	56.6688	73.9795	56.9645	112.159	66.2431	81.7352	81.8769	59.5746	85.5035	-0.517406	0.0274507
ENSMUSG00000009092	Derl3	66.1115	48.0244	33.627	38.3415	63.5862	32.2015	104.661	123.426	46.5261	80.9687	-0.796563	0.0275433
ENSMUSG00000021379	Id4	169.686	129.666	143.756	135.838	134.238	114.085	96.6867	86.7651	144.737	107.944	0.414837	0.0275992
ENSMUSG00000041355	Ssr2	1415.89	1295.7	1282.87	1412.06	1517.24	1503.35	1539.01	1686.42	1351.63	1561.51	-0.208175	0.0276162
ENSMUSG00000019768	Esr1	163.075	219.952	179.905	177.466	194.291	226.33	220.286	395.942	185.099	259.212	-0.480213	0.0276337
ENSMUSG00000044949	Ubtd2	22.0372	26.8937	26.061	26.2913	18.546	11.0405	13.9548	14.6645	25.3208	14.5514	0.799123	0.0277377
ENSMUSG00000030790	Adm	30.852	19.2098	26.061	25.1958	38.8582	42.322	37.8773	37.8833	25.3297	39.2352	-0.637006	0.0277397
ENSMUSG00000111394	AC160637.1	27.5465	24.0122	26.9016	41.6279	12.364	20.2409	17.9419	19.5527	30.0221	17.5249	0.778028	0.0278172
ENSMUSG00000038248	Sobp	13.2223	5.76293	9.24744	9.85924	1.76628	7.36034	0	2.44409	9.52298	2.89268	1.69465	0.0279772
ENSMUSG00000082644	Mup-ps19	1259.42	2164.94	2015.1	3211.92	5669.77	3063.74	1880.91	9860.67	2162.85	5118.77	-1.24282	0.028013
ENSMUSG00000078247	Airn	34.1576	33.6171	19.3355	43.8189	21.1954	16.5608	21.9289	15.8866	32.7323	18.8929	0.776942	0.0280821
ENSMUSG00000048087	Gm4737	11337	9415.66	10523.6	7944.36	12962.8	10949.4	11206.7	12429.4	9805.16	11887.1	-0.277739	0.0281575
ENSMUSG00000081958	Gm11594	0	0.960488	2.52203	1.09547	3.53257	7.36034	5.98062	4.88817	1.1445	5.44043	-2.17985	0.0283498
ENSMUSG00000025810	Nrp1	1256.12	981.618	1121.46	1221.45	1218.74	1078.29	1636.7	2296.22	1145.16	1557.49	-0.44295	0.0284174
ENSMUSG00000025006	Sorbs1	1112.88	1136.26	1225.71	1313.47	984.703	1144.53	1009.73	827.323	1197.08	991.572	0.270541	0.0284772
ENSMUSG00000053219	Raet1e	84.8431	104.693	123.579	115.025	60.0536	87.4041	94.6932	67.2124	107.035	77.3408	0.470606	0.0289271
ENSMUSG00000024222	Fkbp5	1505.14	1290.9	981.91	679.192	1362.69	1567.75	1235	2039.59	1114.28	1551.26	-0.476975	0.0293794
ENSMUSG00000029683	Lmod2	7.71301	6.72341	10.9288	2.19094	7.94827	15.6407	23.9225	17.1086	6.88904	16.155	-1.19991	0.029438
ENSMUSG00000029648	Flt1	249.02	211.307	215.213	211.426	235.799	282.453	284.08	290.846	221.742	273.294	-0.300838	0.0295293
ENSMUSG00000087440	4930577N17Rik	19.8335	16.3283	18.4949	26.2913	9.71456	11.0405	14.9516	6.11022	20.237	10.4542	0.933642	0.0296847
ENSMUSG00000085596	Gm11476	3.30558	6.72341	2.52203	8.76377	1.76628	0	0	2.44409	5.3287	1.05259	2.39117	0.0297339
ENSMUSG00000053646	Plxnb1	1315.62	1052.69	1186.19	1104.24	1303.52	1688.28	1430.37	1235.49	1164.69	1414.41	-0.280979	0.0298777
ENSMUSG00000112397	Gm10824	2.20372	0	5.04406	3.28641	0	0	0	0	2.63355	0	3.84975	0.0299527
ENSMUSG00000071550	Cfap44	11.0186	1.92098	4.20338	3.28641	0	0	2.99031	0	5.10734	0.747578	2.76377	0.0300727
ENSMUSG00000115082	AC156016.2	0	0	0	0	0.883142	0.920043	2.99031	4.88817	0	2.42042	-3.70111	0.0300882
ENSMUSG00000004931	Apba3	1679.23	1239.03	1495.56	1467.93	1949.98	2047.09	1535.03	1657.09	1470.44	1797.3	-0.290276	0.0300938
ENSMUSG00000042985	Upk3b	74.9264	145.034	104.244	67.9192	95.3793	68.0832	32.8934	41.5495	98.0308	59.4763	0.715704	0.0301039
ENSMUSG00000054404	Slfn5	410.993	454.311	523.741	441.475	352.374	404.819	407.679	343.394	457.63	377.066	0.280163	0.0301762
ENSMUSG00000097347	Gm17275	16.5279	9.60488	9.24744	7.6683	17.6628	12.8806	27.9096	25.6629	10.7621	21.029	-0.965095	0.0303485
ENSMUSG00000020644	Id2	2110.06	2177.43	2254.69	1346.33	2350.92	2091.26	2684.3	3116.21	1972.13	2560.67	-0.376104	0.0304586
ENSMUSG00000030641	Ddias	17.6297	20.1702	16.8135	20.814	8.83142	8.28038	3.98708	17.1086	18.8569	9.55187	1.00926	0.0304641
ENSMUSG00000028069	Gpatch4	236.9	211.307	198.4	182.944	248.163	253.012	242.215	279.848	207.388	255.809	-0.30171	0.0307698
ENSMUSG00000040247	Tbc1d10c	5.50929	12.4863	4.20338	5.47736	2.64942	0.920043	1.99354	2.44409	6.91909	2.00177	1.80024	0.0308586
ENSMUSG00000046415	B430212C06Rik	70.519	54.7478	70.6168	64.6328	37.0919	46.0021	62.7965	26.885	65.1291	43.1939	0.584893	0.0308686
ENSMUSG00000086308	G630016G05Rik	3.30558	3.84195	5.88473	4.38189	0	1.84009	0.99677	0	4.35354	0.709214	2.57589	0.0309454
ENSMUSG00000022439	Parvg	78.232	76.839	131.986	98.5924	75.9502	65.323	78.7449	46.4376	96.4124	66.6139	0.53093	0.0311637
ENSMUSG00000093599	Mir5620	14.3242	9.60488	6.72541	25.1958	8.83142	6.4403	2.99031	3.66613	13.9626	5.48204	1.30914	0.031254
ENSMUSG00000062960	Kdr	969.636	882.688	1002.09	999.07	1089.8	1113.25	1129.34	1096.17	963.37	1107.14	-0.20075	0.0320343
ENSMUSG00000089983	2010320O07Rik	4.40743	0	1.68135	4.38189	0	0	0	0	2.61767	0	3.82037	0.0321066
ENSMUSG00000096586	Gm22918	1.10186	1.92098	1.68135	0	3.53257	6.4403	3.98708	7.33226	1.17605	5.32305	-2.12144	0.0321085
ENSMUSG00000074771	Ankef1	4.40743	3.84195	0	2.19094	0	0	0	0	2.61008	0	3.81813	0.0322836
ENSMUSG00000021340	Gpld1	4282.92	3404.93	3791.45	3681.88	4882.89	4115.35	4479.49	4282.04	3790.3	4439.94	-0.228458	0.032375
ENSMUSG00000003190	Bcl2l12	114.593	86.4439	115.173	96.4015	172.213	123.286	127.587	123.426	103.153	136.628	-0.408086	0.0324141
ENSMUSG00000018821	Avpi1	696.375	666.578	795.28	628.801	983.82	872.2	726.646	801.66	696.758	846.082	-0.280043	0.0324588
ENSMUSG00000028995	Fam126a	418.706	463.916	394.277	449.143	350.607	423.22	333.918	237.076	431.511	336.205	0.356121	0.0325947
ENSMUSG00000048782	Insc	182.909	195.939	232.027	276.059	294.969	258.532	239.225	370.279	221.733	290.751	-0.388429	0.0330899
ENSMUSG00000038135	Crygn	48.4818	48.9849	65.5727	71.2057	96.2624	66.2431	85.7222	79.4328	58.5613	81.9151	-0.484057	0.0333296
ENSMUSG00000029656	C8b	1522.77	1397.51	1335.83	1282.8	1453.65	1607.31	2193.89	4570.44	1384.73	2456.32	-0.826645	0.0334839
ENSMUSG00000076587	Igkv6-20	4.40743	0.960488	0	5.47736	0	0	0	0	2.71132	0	3.86547	0.0336616
ENSMUSG00000027712	Anxa5	4614.58	5080.02	4607.75	4869.37	4301.78	4685.78	3612.3	2820.48	4792.93	3855.08	0.31374	0.033774
ENSMUSG00000021211	Akr1c12	1353.08	1660.68	1787.28	1592.82	1962.34	1749	1858.98	1979.71	1598.46	1887.51	-0.238935	0.0338259
ENSMUSG00000031538	Plat	48.4818	34.5776	68.9354	65.7283	31.7931	40.4819	41.8644	26.885	54.4308	35.2561	0.622547	0.0341816
ENSMUSG00000041828	Abca8a	853.941	731.892	976.025	993.593	844.283	1065.41	1384.51	1220.82	888.862	1128.76	-0.344029	0.0342843
ENSMUSG00000103693	Gm37529	3.30558	6.72341	1.68135	6.57283	0	0	1.99354	1.22204	4.57079	0.803896	2.5737	0.0343043
ENSMUSG00000030505	Prmt3	164.177	174.809	131.145	151.175	115.692	127.886	122.603	122.204	155.327	122.096	0.345321	0.0343084
ENSMUSG00000103270	Gm37915	1.10186	2.88146	2.52203	2.19094	0	0	0	0	2.17407	0	3.57413	0.0343597
ENSMUSG00000037210	Fam193a	345.984	365.946	322.82	363.697	280.839	249.332	291.057	332.396	349.611	288.406	0.280217	0.0343791
ENSMUSG00000028780	Sema3c	38.5651	45.1429	32.7864	24.1004	22.0785	27.6013	9.9677	23.2188	35.1487	20.7166	0.763309	0.0344867
ENSMUSG00000040724	Kcna2	112.39	144.073	115.173	107.356	83.8985	93.8444	109.645	70.8785	119.748	89.5665	0.416238	0.0345929
ENSMUSG00000005043	Sgsh	210.455	164.243	208.488	242.099	178.395	182.168	142.538	131.981	206.321	158.77	0.371845	0.034681
ENSMUSG00000103089	Gm38118	12.1204	0.960488	1.68135	2.19094	0	0.920043	0.99677	0	4.23831	0.479203	3.06431	0.034686
ENSMUSG00000065126	Snord104	31.9539	37.459	30.2643	32.8641	44.1571	36.8017	57.8127	59.8801	33.1354	49.6629	-0.576082	0.0347092
ENSMUSG00000022066	Entpd4b	12.1204	32.6566	11.7695	16.4321	22.0785	46.0021	31.8967	31.7731	18.2446	32.9376	-0.850604	0.0347819
ENSMUSG00000041747	Utp15	190.622	189.216	159.728	185.135	189.875	211.61	248.196	262.739	181.175	228.105	-0.330378	0.0348576
ENSMUSG00000026200	Glb1l	96.9636	97.9697	77.3422	88.7332	79.4827	53.3625	69.7739	62.3242	90.2522	66.2358	0.441174	0.0349255
ENSMUSG00000049723	Mmp12	300.807	287.186	380.826	369.174	197.824	335.816	284.08	162.532	334.498	245.063	0.44656	0.0349336
ENSMUSG00000015363	Trabd	2160.74	1823.01	2156.33	2029.91	2691.82	2320.35	2074.28	2600.51	2042.5	2421.74	-0.245636	0.0349408
ENSMUSG00000000340	Dbt	1607.61	1706.79	1742.72	1538.04	1732.72	1737.96	2132.09	2274.22	1648.79	1969.25	-0.255187	0.0349551
ENSMUSG00000097230	Gm26853	0	0	0	1.09547	0.883142	0.920043	7.97416	2.44409	0.273868	3.05536	-3.33478	0.0349736
ENSMUSG00000115819	AC108858.2	48.4818	42.2615	52.9626	51.4872	59.1705	69.0032	79.7416	63.5463	48.7982	67.8654	-0.475128	0.035011
ENSMUSG00000114438	AC154767.2	7.71301	9.60488	3.3627	9.85924	1.76628	3.68017	1.99354	2.44409	7.63496	2.47102	1.61365	0.0350419
ENSMUSG00000097354	2310001H17Rik	192.825	181.532	165.613	210.331	222.552	196.889	239.225	295.734	187.575	238.6	-0.345245	0.0353845
ENSMUSG00000054493	Gm9947	0	0.960488	0	0	0	3.68017	1.99354	7.33226	0.240122	3.25149	-3.40601	0.0353987
ENSMUSG00000056162	Cndp1	13.2223	26.8937	16.8135	32.8641	15.8965	8.28038	12.958	9.77635	22.4484	11.7278	0.925242	0.0354811
ENSMUSG00000110935	Gm8834	33.0558	31.6961	29.4237	51.4872	19.4291	28.5213	24.9193	15.8866	36.4157	22.1891	0.698571	0.0356275
ENSMUSG00000015083	C8g	6610.05	7602.26	7576.17	7839.19	8217.63	7875.57	8695.82	9764.13	7406.92	8638.29	-0.221663	0.0357242
ENSMUSG00000051344	Plekhm3	73.8245	78.76	79.0236	86.5423	66.2356	55.2026	43.8579	67.2124	79.5376	58.1271	0.454781	0.0358142
ENSMUSG00000024011	Pi16	23.139	22.0912	38.6711	13.1457	7.94827	18.4009	13.9548	10.9984	24.2618	12.8256	0.929369	0.0358646
ENSMUSG00000057228	Aadat	1365.2	1459.94	1440.92	1356.19	1541.08	1361.66	1932.74	2038.37	1405.56	1718.46	-0.289001	0.0358935
ENSMUSG00000053111	Fank1	5.50929	0.960488	1.68135	3.28641	0	0	0.99677	0	2.85939	0.249193	3.22293	0.0359187
ENSMUSG00000071497	Nutf2-ps1	29.7502	70.1156	41.1931	73.3966	25.6111	37.7217	26.9128	42.7715	53.6139	33.2543	0.695563	0.0361915
ENSMUSG00000050945	Zfp438	30.852	25.9332	42.8745	38.3415	41.5077	52.4424	61.7998	50.1038	34.5003	51.4634	-0.571019	0.0361932
ENSMUSG00000057425	Ugt2b37	79.3338	45.1429	59.688	100.783	75.9502	88.3241	126.59	130.759	71.237	105.406	-0.566741	0.0362488
ENSMUSG00000105449	Gm43379	34.1576	22.0912	13.4508	21.9094	14.1303	10.1205	11.9612	13.4425	22.9023	12.4136	0.873669	0.0363396
ENSMUSG00000018796	Acsl1	22768.8	24479	25233.7	22782.5	27153.1	23994.7	30410.5	28962.4	23816	27630.2	-0.214254	0.0365942
ENSMUSG00000027597	Ahcy	51862.3	47781.4	49571.3	37110.2	59207.6	50562.8	53359.1	59850.8	46581.3	55745.1	-0.259076	0.0366582
ENSMUSG00000073802	Cdkn2b	15.426	10.5654	7.56608	12.0502	5.29885	4.60021	5.98062	3.66613	11.4019	4.88645	1.19935	0.0369475
ENSMUSG00000024029	Tff3	12.1204	16.3283	13.4508	18.623	15.0134	50.6023	12.958	40.3274	15.1306	29.7253	-0.97096	0.0372278
ENSMUSG00000032083	Apoa1	121618	126438	118669	136683	129103	146174	142674	175681	125852	148408	-0.237833	0.0372666
ENSMUSG00000083355	Gm11581	2.20372	5.76293	4.20338	2.19094	0	0.920043	0.99677	0	3.59024	0.479203	2.85832	0.0372753
ENSMUSG00000034773	BC030867	3.30558	3.84195	12.6101	5.47736	2.64942	0.920043	0.99677	2.44409	6.30876	1.75258	1.87966	0.0375527
ENSMUSG00000079608	Stard6	1.10186	0.960488	0	0	3.53257	6.4403	1.99354	2.44409	0.515587	3.60262	-2.85985	0.0377567
ENSMUSG00000113775	CT025604.1	0	0.960488	0.840676	0	2.64942	9.20043	1.99354	1.22204	0.450291	3.76636	-2.96186	0.0379633
ENSMUSG00000028362	Tnfsf8	0	0.960488	0.840676	0	3.53257	3.68017	1.99354	4.88817	0.450291	3.52361	-2.83706	0.0381721
ENSMUSG00000108912	E230020D15Rik	3.30558	2.88146	3.3627	0	0	0	0	0	2.38744	0	3.71041	0.0381953
ENSMUSG00000087231	E230016M11Rik	13.2223	22.0912	18.4949	19.7185	12.364	7.36034	9.9677	9.77635	18.3817	9.86709	0.899132	0.0383275
ENSMUSG00000031995	St14	39.6669	32.6566	66.4134	30.6732	27.3774	28.5213	29.9031	19.5527	42.3525	26.3386	0.687399	0.0383975
ENSMUSG00000015451	C4a	813.172	613.752	667.497	718.629	728.592	704.753	1376.54	2345.1	703.262	1288.75	-0.873487	0.0384206
ENSMUSG00000060962	Dmkn	4.40743	4.80244	2.52203	4.38189	0.883142	0.920043	0.99677	0	4.02845	0.699989	2.45314	0.0385617
ENSMUSG00000029369	Afm	2283.05	2413.71	2189.96	2412.23	2322.66	2528.28	3152.78	3068.55	2324.74	2768.07	-0.251462	0.038577
ENSMUSG00000099009	Rdh16f1	0	1.92098	0	1.09547	9.71456	8.28038	1.99354	0	0.754112	4.99712	-2.76358	0.0386362
ENSMUSG00000104367	Gm38079	12.1204	9.60488	12.6101	7.6683	19.4291	21.161	24.9193	12.2204	10.5009	19.4324	-0.890983	0.038726
ENSMUSG00000080935	Got2-ps1	38.5651	46.1034	58.0066	55.869	72.4176	79.1237	57.8127	68.4344	49.636	69.4471	-0.481815	0.0387723
ENSMUSG00000031343	Gabra3	69.4171	68.1946	95.8371	52.5826	40.6245	56.1226	43.8579	59.8801	71.5079	50.1213	0.525608	0.0388959
ENSMUSG00000064372	mt-Tp	1465.47	1725.04	1106.33	1336.48	1721.24	1438.95	1748.34	2181.35	1408.33	1772.47	-0.331458	0.0389112
ENSMUSG00000024824	Rad9a	3.30558	1.92098	5.88473	7.6683	5.29885	34.0416	3.98708	10.9984	4.6949	13.5815	-1.53879	0.0389646
ENSMUSG00000070034	Sp110	52.8892	63.3922	92.4744	51.4872	37.9751	44.162	55.8191	40.3274	65.0607	44.5709	0.554386	0.0389977
ENSMUSG00000086292	Gm16052	1.10186	0.960488	0	0	2.64942	1.84009	4.98385	4.88817	0.515587	3.59038	-2.82785	0.0390174
ENSMUSG00000059810	Rgs3	323.946	199.781	380.826	193.898	275.54	426.9	383.757	433.825	274.613	380.005	-0.465952	0.0391741
ENSMUSG00000109784	Gm45493	1.10186	1.92098	1.68135	6.57283	0	0	0.99677	0	2.81925	0.249193	3.20805	0.0392021
ENSMUSG00000069668	Sult3a1	0	10.5654	2.52203	1.09547	7.94827	7.36034	19.9354	9.77635	3.54572	11.2551	-1.63739	0.039367
ENSMUSG00000026628	Atf3	174.094	171.927	149.64	130.361	97.1456	144.447	100.674	135.647	156.506	119.478	0.392458	0.0393999
ENSMUSG00000090925	1810064F22Rik	42.9725	44.1824	35.3084	37.246	20.3123	23.0011	37.8773	21.9968	39.9273	25.7968	0.628899	0.0398556
ENSMUSG00000078894	2210418O10Rik	20.9353	30.7356	21.8576	17.5275	6.18199	12.8806	20.9322	8.5543	22.764	12.1373	0.909659	0.0400162
ENSMUSG00000109222	Gm10297	40.7688	61.4712	46.2372	33.9596	55.6379	69.0032	54.8224	89.2092	45.6092	67.1682	-0.545492	0.0401146
ENSMUSG00000025511	Tspan4	1203.23	1251.52	1338.36	1092.19	1287.62	1321.18	1564.93	1625.32	1221.32	1449.76	-0.245935	0.0402246
ENSMUSG00000025289	Prdx4	718.412	944.159	849.083	839.131	941.429	926.483	994.777	1116.95	837.696	994.909	-0.246464	0.0406477
ENSMUSG00000028011	Tdo2	37091.9	41684.2	39048.6	33372.4	43086.7	38559.9	46032.8	50378.7	37799.3	44514.6	-0.235874	0.0406751
ENSMUSG00000107019	Gm43682	15.426	7.6839	3.3627	6.57283	2.64942	3.68017	0.99677	3.66613	8.26136	2.74812	1.57987	0.0406953
ENSMUSG00000074738	Fndc10	74.9264	58.5897	70.6168	79.9694	45.0402	68.0832	51.8321	25.6629	71.0256	47.6546	0.561517	0.0408477
ENSMUSG00000039452	Snx22	6.61115	8.64439	10.9288	14.2411	17.6628	11.0405	13.9548	41.5495	10.1064	21.0519	-1.03723	0.0409303
ENSMUSG00000022947	Cbr3	115.695	107.575	92.4744	121.597	77.7165	100.285	81.7352	26.885	109.335	71.6553	0.597447	0.0410111
ENSMUSG00000024164	C3	126411	104015	97405.8	103346	117297	119201	130193	139111	107794	126451	-0.230293	0.0410431
ENSMUSG00000049037	Clec4a1	57.2967	92.2068	78.1829	50.3917	36.2088	60.7228	57.8127	25.6629	69.5195	45.1018	0.620654	0.041164
ENSMUSG00000024883	Rin1	24.2409	15.3678	18.4949	14.2411	13.2471	2.76013	12.958	6.11022	18.0862	8.76887	1.0327	0.0412791
ENSMUSG00000025351	Cd63	686.458	578.214	730.548	569.645	456.584	667.031	501.375	283.514	641.216	477.126	0.424646	0.0413838
ENSMUSG00000078683	Mup1	42.9725	61.4712	52.1219	37.246	59.1705	22.081	78.7449	595.135	48.4529	188.783	-1.96024	0.0414379
ENSMUSG00000026065	Slc9a4	0	4.80244	6.72541	0	0	0	0	0	2.88196	0	3.9922	0.0417758
ENSMUSG00000041698	Slco1a1	119.001	235.319	255.566	198.28	467.182	150.887	184.403	1719.41	202.042	630.472	-1.64108	0.0418666
ENSMUSG00000075543	Urad	861.654	928.792	629.666	529.113	901.688	898.882	904.071	1047.29	737.306	937.983	-0.346892	0.0419739
ENSMUSG00000049832	Rbx1-ps	1.10186	5.76293	8.40676	3.28641	25.6111	5.52026	7.97416	10.9984	4.63949	12.526	-1.40493	0.0420503
ENSMUSG00000086628	Gm16157	282.076	416.852	334.589	249.768	409.778	355.136	417.647	444.824	320.821	406.846	-0.339579	0.0421321
ENSMUSG00000031443	F7	1706.78	1611.7	1472.86	1465.74	1707.11	1653.32	1892.87	2075.03	1564.27	1832.08	-0.227475	0.0422522
ENSMUSG00000039519	Cyp7b1	785.625	742.457	869.259	869.804	898.155	763.635	1508.11	2511.3	816.786	1420.3	-0.797724	0.0422898
ENSMUSG00000040389	Wdr47	65.0097	47.0639	39.5118	47.1053	31.7931	34.9616	37.8773	30.5511	49.6727	33.7958	0.546411	0.0424216
ENSMUSG00000070407	Hs3st3b1	1448.94	1359.09	1602.33	1473.41	1627.63	1868.61	1590.85	1705.97	1470.94	1698.26	-0.207051	0.0424955
ENSMUSG00000005514	Por	11939.7	9059.32	12682.4	9343.28	14762.6	11427.8	13942.8	12237.5	10756.2	13092.7	-0.283582	0.0425954
ENSMUSG00000024807	Syvn1	1613.12	1123.77	1009.65	1650.88	1318.53	1540.15	1660.62	2980.56	1349.35	1874.97	-0.474382	0.0427262
ENSMUSG00000109194	Gm44570	4.40743	4.80244	5.88473	4.38189	1.76628	1.84009	0.99677	0	4.86912	1.15078	2.01565	0.0427262
ENSMUSG00000106157	4930555A03Rik	0	2.88146	4.20338	2.19094	0	0	0	0	2.31895	0	3.6758	0.0429326
ENSMUSG00000033107	Rnf125	819.783	872.123	996.201	1157.91	742.722	748.915	953.909	673.346	961.505	779.723	0.30182	0.042938
ENSMUSG00000004707	Ly9	94.7598	105.654	147.959	100.783	99.795	89.2441	71.7675	72.1006	112.289	83.2268	0.432306	0.0431871
ENSMUSG00000022750	Klhl22	460.577	404.365	403.525	445.857	529.002	481.182	493.401	496.15	428.581	499.934	-0.224132	0.043239
ENSMUSG00000030402	Ppm1n	2.20372	5.76293	2.52203	3.28641	0	0.920043	0.99677	0	3.44377	0.479203	2.78782	0.0432779
ENSMUSG00000108472	Gm45212	4.40743	3.84195	1.68135	7.6683	2.64942	0	0	0	4.39976	0.662356	2.60977	0.0432828
ENSMUSG00000036931	Nfkbid	30.852	13.4468	26.9016	36.1506	10.5977	14.7207	19.9354	15.8866	26.8378	15.2851	0.812436	0.0436614
ENSMUSG00000020258	Glyctk	3114.95	2782.53	2995.33	2935.86	3154.58	3352.64	3253.46	3781	2957.17	3385.42	-0.194772	0.0437495
ENSMUSG00000093933	Gm25526	0	0	0	0	2.64942	0	2.99031	3.66613	0	2.32647	-3.65784	0.0442505
ENSMUSG00000022824	Muc13	2.20372	1.92098	22.6983	0	0	0	0	0	6.70574	0	5.19681	0.0442595
ENSMUSG00000069041	Slc25a31	0	0	0	0	2.64942	0	1.99354	19.5527	0	6.04891	-5.04107	0.0442809
ENSMUSG00000038648	Creb3l2	388.956	350.578	390.074	372.46	407.128	480.262	368.805	668.458	375.517	481.163	-0.354985	0.044411
ENSMUSG00000001131	Timp1	61.7041	45.1429	65.5727	40.5324	42.3908	35.8817	41.8644	13.4425	53.238	33.3948	0.659446	0.0445758
ENSMUSG00000103227	Gm37733	2.20372	1.92098	1.68135	2.19094	0	0	0	0	1.99925	0	3.44176	0.0446078
ENSMUSG00000049409	Prokr1	13.2223	8.64439	6.72541	8.76377	2.64942	3.68017	2.99031	6.11022	9.33897	3.85753	1.29727	0.0446183
ENSMUSG00000065954	Tacc1	882.589	716.524	636.392	572.932	718.877	710.273	919.022	1454.23	702.109	950.601	-0.436004	0.0446254
ENSMUSG00000093916	Gm379	1.10186	6.72341	0.840676	1.09547	4.41571	2.76013	8.97093	18.3306	2.44036	8.61935	-1.78593	0.0447354
ENSMUSG00000030787	Lyve1	502.448	437.022	495.158	461.194	351.49	434.26	445.556	344.616	473.955	393.981	0.265431	0.0447372
ENSMUSG00000111264	E030022I16Rik	12.1204	10.5654	5.88473	13.1457	4.41571	3.68017	4.98385	4.88817	10.4291	4.49198	1.20808	0.045016
ENSMUSG00000022032	Scara5	113.491	61.4712	36.1491	52.5826	40.6245	122.366	97.6835	591.469	65.9236	213.036	-1.69194	0.0450193
ENSMUSG00000088456	Gm26372	5.50929	1.92098	0	2.19094	0	0	0	0	2.4053	0	3.69457	0.0450314
ENSMUSG00000050335	Lgals3	650.097	635.843	932.31	683.574	581.99	682.672	599.059	397.164	725.456	565.221	0.359239	0.0451195
ENSMUSG00000113878	Gm19045	2.20372	1.92098	0	5.47736	0	0	0	0	2.40051	0	3.69222	0.0452245
ENSMUSG00000006736	Tspan31	4799.7	4459.54	4228.6	4540.73	5433.97	5194.56	4603.09	5325.66	4507.14	5139.32	-0.189522	0.0453132
ENSMUSG00000056394	Lig1	79.3338	77.7995	118.535	95.306	87.431	66.2431	66.7836	37.8833	92.7437	64.5853	0.514202	0.0455044
ENSMUSG00000045934	Mtmr11	70.519	65.3132	63.8914	94.2106	45.0402	60.7228	62.7965	14.6645	73.4835	45.806	0.667654	0.0455211
ENSMUSG00000039917	Rhbdd2	490.327	449.508	485.07	510.49	553.73	571.346	570.153	538.921	483.849	558.538	-0.208254	0.0456334
ENSMUSG00000060260	Pwwp2b	2.20372	5.76293	5.04406	2.19094	4.41571	34.0416	3.98708	4.88817	3.80041	11.8331	-1.62966	0.0459553
ENSMUSG00000029247	Paics	3768.36	3699.8	3068.47	3315.99	3733.04	3585.41	4051.87	5904.91	3463.15	4318.81	-0.318253	0.0459655
ENSMUSG00000024737	Slc15a3	515.67	449.508	617.897	518.158	450.402	500.503	411.666	337.284	525.308	424.964	0.304146	0.0460498
ENSMUSG00000020053	Igf1	7194.04	7612.83	6123.48	6508.2	7039.52	6928.84	9898.93	9624.81	6859.64	8373.03	-0.287511	0.0461258
ENSMUSG00000066366	Serpina1a	17014.9	19083.9	17372.6	18940.7	18397.6	18119.3	23428.1	29683.4	18103	22407.1	-0.307652	0.0461712
ENSMUSG00000106457	Gm42585	3.30558	2.88146	1.68135	2.19094	0.883142	0	0	0	2.51483	0.220785	3.04872	0.046537
ENSMUSG00000022849	Hspbap1	81.5375	82.6019	58.8473	52.5826	47.6896	51.5224	43.8579	54.9919	68.8924	49.5155	0.478265	0.0465946
ENSMUSG00000094158	Gm23264	0	0.960488	0	0	0.883142	1.84009	6.97739	1.22204	0.240122	2.73067	-3.18099	0.0466412
ENSMUSG00000030559	Rab38	5.50929	12.4863	5.88473	9.85924	16.7797	14.7207	16.9451	15.8866	8.4349	16.083	-0.933827	0.0467079
ENSMUSG00000101188	Eif4a-ps4	1204.33	1176.6	1145	1159.01	1354.74	1236.54	1298.79	1445.68	1171.23	1333.94	-0.187135	0.0467763
ENSMUSG00000113642	CT030170.6	9.91673	3.84195	0	3.28641	0	0	1.99354	0	4.26127	0.498385	3.05419	0.0469321
ENSMUSG00000051147	Nat2	271.057	317.921	327.023	243.195	363.854	336.736	339.899	360.503	289.799	350.248	-0.269838	0.0470224
ENSMUSG00000026117	Zap70	347.085	484.086	500.202	469.957	549.314	547.425	512.34	565.806	450.333	543.721	-0.269826	0.0472139
ENSMUSG00000038141	Tmem181a	179.603	166.164	136.19	136.934	119.224	113.165	144.532	107.54	154.723	121.115	0.349896	0.0472577
ENSMUSG00000085614	1700123M08Rik	0	0	0.840676	0	2.64942	1.84009	2.99031	2.44409	0.210169	2.48098	-3.0406	0.0472869
ENSMUSG00000097372	Gm26876	0	0	0	0	2.64942	0.920043	0.99677	3.66613	0	2.05809	-3.47897	0.047766
ENSMUSG00000026589	Sec16b	2388.83	2221.61	2184.08	2344.31	2492.23	2474.91	2739.12	2598.06	2284.71	2576.08	-0.173331	0.0477957
ENSMUSG00000051396	Gm45902	26.4446	20.1702	26.061	23.0049	11.4808	22.081	11.9612	9.77635	23.9202	13.8249	0.777423	0.0478384
ENSMUSG00000038079	Tmem237	109.084	135.429	120.217	170.894	87.431	118.686	100.674	102.652	133.906	102.36	0.386239	0.0479573
ENSMUSG00000040212	Emp3	93.658	112.377	140.393	98.5924	82.1322	81.8838	102.667	68.4344	111.255	83.7794	0.411357	0.0480714
ENSMUSG00000057729	Prtn3	11.0186	15.3678	5.88473	1.09547	5.29885	17.4808	13.9548	48.8817	8.34165	21.404	-1.34025	0.0481154
ENSMUSG00000023272	Creld2	727.227	657.934	507.768	716.438	619.965	805.037	1012.72	2166.68	652.342	1151.1	-0.818981	0.0481611
ENSMUSG00000025036	Sfxn2	1084.23	1035.41	920.54	859.945	1131.3	1095.77	1112.4	1187.83	975.03	1131.82	-0.214968	0.0482192
ENSMUSG00000024424	Ttc39c	3674.7	3867.88	5042.38	3953.56	5161.96	3892.7	5773.29	5394.1	4134.63	5055.51	-0.289793	0.0482889
ENSMUSG00000043110	Lrrn4	19.8335	29.7751	24.3796	23.0049	16.7797	19.3209	12.958	6.11022	24.2483	13.7922	0.791597	0.0483042
ENSMUSG00000110105	Gm45844	6.61115	13.4468	9.24744	12.0502	11.4808	18.4009	27.9096	19.5527	10.3389	19.336	-0.895223	0.0483788
ENSMUSG00000083087	Gm11249	103.575	165.204	172.339	115.025	204.889	186.769	159.483	177.196	139.035	182.084	-0.384275	0.0484019
ENSMUSG00000074865	Zfp934	9.91673	9.60488	10.0881	8.76377	2.64942	1.84009	5.98062	6.11022	9.59337	4.14509	1.24854	0.0485219
ENSMUSG00000080875	Gm7332	61.7041	45.1429	68.9354	79.9694	61.8199	31.2815	21.9289	50.1038	63.938	41.2835	0.630526	0.0486414
ENSMUSG00000108371	Gm38832	3.30558	8.64439	3.3627	4.38189	9.71456	11.0405	9.9677	13.4425	4.92364	11.0413	-1.15471	0.0487671
ENSMUSG00000039765	Cc2d2a	76.0283	87.4044	91.6337	101.879	63.5862	54.2825	86.719	61.1022	89.2363	66.4225	0.426737	0.0489567
ENSMUSG00000087436	Gm16156	0	3.84195	4.20338	1.09547	0	0	0	0	2.2852	0	3.65783	0.0491196
ENSMUSG00000107906	Gm5580	4.40743	1.92098	0.840676	1.09547	0	0	0	0	2.06614	0	3.48001	0.0491316
ENSMUSG00000083650	Gm13357	2.20372	0.960488	2.52203	2.19094	0	0	0	0	1.96929	0	3.42439	0.0493481
ENSMUSG00000022514	Il1rap	2373.4	2381.05	2234.52	2371.7	2516.95	2343.35	2853.75	3426.61	2340.17	2785.17	-0.250622	0.049461
ENSMUSG00000085982	9530051G07Rik	3.30558	2.88146	0.840676	1.09547	0	0	0	0	2.0308	0	3.46046	0.0494655
ENSMUSG00000104777	Gm4865	2.20372	2.88146	1.68135	1.09547	0	0	0	0	1.9655	0	3.42332	0.0494959
ENSMUSG00000021876	Rnase4	13108.8	14229.6	13852.7	13536.7	14457.9	12788.6	16984	26269	13682	17624.9	-0.365238	0.0495036
ENSMUSG00000024966	Stip1	1876.47	1754.81	1692.28	1418.64	1942.91	1920.13	1727.4	2703.16	1685.55	2073.4	-0.298087	0.0495487
ENSMUSG00000050075	Gpr171	0	0	1.68135	0	5.29885	1.84009	3.98708	2.44409	0.420338	3.39253	-2.82639	0.049622
ENSMUSG00000043336	Filip1l	146.547	154.639	147.118	161.034	90.9636	122.366	122.603	145.423	152.335	120.339	0.346616	0.049695
ENSMUSG00000083261	Gm7816	70.519	61.4712	56.3253	71.2057	80.3659	74.5235	95.69	91.6532	64.8803	85.5581	-0.401116	0.0497798
ENSMUSG00000026536	Ifi211	83.7413	78.76	95.8371	69.0147	40.6245	69.0032	70.7707	58.6581	81.8383	59.7641	0.459291	0.0498202
ENSMUSG00000043782	Bicdl2	11.0186	0.960488	2.52203	4.38189	0.883142	0.920043	0.99677	1.22204	4.72075	1.0055	2.22371	0.049854
ENSMUSG00000092103	Gm17039	0	0	0	1.09547	1.76628	0	5.98062	3.66613	0.273868	2.85326	-3.23002	0.0500299
ENSMUSG00000044986	Tst	4254.28	4886	5773.76	4705.05	6329.48	5353.73	5849.05	5479.64	4904.77	5752.97	-0.229949	0.0501224
ENSMUSG00000059422	Gm8116	156.464	135.429	148.8	115.025	103.328	92.0043	114.629	127.093	138.929	109.263	0.353257	0.0502145
ENSMUSG00000087281	Gm16015	8.81487	2.88146	2.52203	7.6683	0	0.920043	3.98708	0	5.47167	1.22678	2.12871	0.050826
ENSMUSG00000046747	Gm9812	1.10186	2.88146	1.68135	4.38189	0	0.920043	0	0	2.51164	0.230011	3.04782	0.0508677
ENSMUSG00000093622	Gm20703	8.81487	7.6839	17.6542	9.85924	3.53257	7.36034	4.98385	3.66613	11.0031	4.88572	1.17397	0.051074
ENSMUSG00000098589	Gm27353	3.30558	0.960488	0.840676	5.47736	0	0.920043	0	0	2.64602	0.230011	3.10641	0.051206
ENSMUSG00000028115	Bnipl	6.61115	3.84195	5.04406	0	0	0	1.99354	0	3.87429	0.498385	2.93957	0.051213
ENSMUSG00000041737	Tmem45b	36.3613	17.2888	34.4677	38.3415	26.4942	22.081	15.9483	6.11022	31.6148	17.6585	0.813355	0.0512393
ENSMUSG00000074482	Gm16589	31.9539	44.1824	46.2372	36.1506	28.2605	20.2409	37.8773	14.6645	39.631	25.2608	0.644391	0.0512737
ENSMUSG00000060548	Tnfrsf19	286.483	303.514	271.538	441.475	314.398	219.89	274.112	171.086	325.753	244.872	0.407231	0.0513355
ENSMUSG00000109199	Gm44996	1.10186	7.6839	4.20338	4.38189	0	0	2.99031	0	4.34276	0.747578	2.54678	0.0513701
ENSMUSG00000025041	Nt5c2	555.337	549.399	555.687	557.595	468.948	516.144	505.363	399.608	554.504	472.516	0.228533	0.0515992
ENSMUSG00000028441	1110017D15Rik	0	1.92098	2.52203	4.38189	0	0	0	0	2.20622	0	3.58966	0.0518391
ENSMUSG00000034765	Dusp5	51.7874	39.38	62.21	76.683	32.6762	50.6023	33.8902	40.3274	57.5151	39.3741	0.545237	0.0521807
ENSMUSG00000021270	Hsp90aa1	5626.09	5094.43	3841.05	4345.74	4244.38	5475.17	5808.18	9516.05	4726.83	6260.95	-0.405355	0.0523469
ENSMUSG00000075304	Sp5	179.603	153.678	167.295	168.703	174.862	113.165	130.577	90.4312	167.32	127.259	0.387203	0.0526086
ENSMUSG00000025823	Pdia4	2653.28	2636.54	2035.28	2567.79	2424.22	2597.28	3066.07	4629.1	2473.22	3179.17	-0.361932	0.0526168
ENSMUSG00000030762	Aqp8	2297.38	2599.08	2432.08	3592.05	2244.95	2678.24	2073.28	1696.2	2730.15	2173.17	0.328595	0.0527754
ENSMUSG00000008318	Relt	27.5465	21.1307	32.7864	20.814	19.4291	8.28038	13.9548	19.5527	25.5694	15.3042	0.7549	0.0530879
ENSMUSG00000027961	Lrrc39	87.0468	48.0244	65.5727	73.3966	49.4559	57.9627	35.8837	50.1038	68.5101	48.3515	0.496959	0.0531293
ENSMUSG00000020051	Pah	16343.9	17038.1	17512.1	14649.7	19612.8	15805.4	20575.3	20485.1	16386	19119.7	-0.222519	0.0532142
ENSMUSG00000071141	Rpl36a-ps3	23.139	22.0912	29.4237	27.3868	30.0268	26.6812	42.8611	62.3242	25.5102	40.4733	-0.647666	0.0534465
ENSMUSG00000033105	Lss	407.688	361.143	446.399	433.807	514.872	458.181	567.162	430.159	412.259	492.594	-0.2578	0.0534518
ENSMUSG00000104358	Gm37127	11.0186	4.80244	6.72541	8.76377	0	0	3.98708	6.11022	7.82755	2.52432	1.71064	0.0535483
ENSMUSG00000109564	Muc16	15.426	19.2098	9.24744	7.6683	6.18199	8.28038	5.98062	3.66613	12.8879	6.02728	1.07606	0.0535818
ENSMUSG00000096940	Gm4755	8.81487	6.72341	10.0881	7.6683	12.364	11.9606	24.9193	14.6645	8.32367	15.9771	-0.932206	0.0537505
ENSMUSG00000052974	Cyp2f2	12889.5	11891.8	11096.1	10557.1	11979.8	14024.2	13723.5	13469.4	11608.6	13299.2	-0.196146	0.053786
ENSMUSG00000036052	Dnajb5	92.5561	65.3132	121.057	84.3513	146.602	102.125	138.551	103.874	90.8195	122.788	-0.433922	0.0539232
ENSMUSG00000030889	Vwa3a	1.10186	0.960488	0	0	1.76628	3.68017	0.99677	7.33226	0.515587	3.44387	-2.75332	0.0542453
ENSMUSG00000053626	Tll1	1.10186	0.960488	10.0881	0	0.883142	0	0	0	3.03761	0.220785	3.35613	0.0544932
ENSMUSG00000029811	Aoc1	5.50929	9.60488	9.24744	6.57283	4.41571	0.920043	3.98708	2.44409	7.73361	2.94173	1.3963	0.0547198
ENSMUSG00000102875	Gm37139	9.91673	5.76293	4.20338	2.19094	0	2.76013	1.99354	1.22204	5.51849	1.49393	1.88287	0.0547357
ENSMUSG00000086140	Hnf1aos2	41.8706	30.7356	29.4237	56.9645	25.6111	21.161	29.9031	26.885	39.7486	25.89	0.611823	0.0548132
ENSMUSG00000076433	Cep295nl	3.30558	1.92098	3.3627	0	0	0	0	0	2.14731	0	3.55739	0.0549051
ENSMUSG00000044155	Lsm8	109.084	157.52	146.278	152.271	117.458	107.645	115.625	107.54	141.288	112.067	0.335411	0.0549276
ENSMUSG00000024077	Strn	295.298	284.304	284.149	310.018	230.5	246.571	260.157	259.073	293.442	249.075	0.237185	0.0551873
ENSMUSG00000002076	Hsf2bp	3.30558	9.60488	18.4949	7.6683	22.9617	10.1205	29.9031	17.1086	9.76841	20.0235	-1.00744	0.055755
ENSMUSG00000028479	Gne	3237.26	3048.59	3674.6	2784.69	4117.21	3339.75	3486.7	4022.97	3186.28	3741.66	-0.231443	0.0558453
ENSMUSG00000115200	AC122769.3	53.9911	63.3922	48.7592	75.5875	37.9751	53.3625	41.8644	39.1054	60.4325	43.0768	0.480806	0.0560382
ENSMUSG00000053985	Zfp14	39.6669	22.0912	24.3796	26.2913	18.546	8.28038	18.9386	21.9968	28.1073	16.9404	0.736732	0.0562639
ENSMUSG00000074805	Il1bos	0	4.80244	0.840676	3.28641	0	0	0	0	2.23238	0	3.60495	0.0563242
ENSMUSG00000055560	Zfp459	3.30558	0.960488	4.20338	4.38189	0.883142	0.920043	0	0	3.21283	0.450796	2.70612	0.0563278
ENSMUSG00000045294	Insig1	1272.65	1451.3	1446.8	1887.5	1875.79	1569.59	2101.19	1770.74	1514.56	1829.33	-0.272601	0.0563443
ENSMUSG00000021335	Slc17a1	191.723	210.347	163.091	209.235	226.967	207.01	249.193	262.739	193.599	236.477	-0.288325	0.0563736
ENSMUSG00000097242	Gm16907	31.9539	23.0517	19.3355	36.1506	21.1954	15.6407	11.9612	18.3306	27.6229	16.782	0.706868	0.0565636
ENSMUSG00000097008	Gm26860	5.50929	3.84195	7.56608	8.76377	1.76628	0	4.98385	1.22204	6.42028	1.99304	1.69021	0.056755
ENSMUSG00000061186	Sfmbt2	12.1204	6.72341	15.1322	9.85924	7.06513	0.920043	1.99354	8.5543	10.9588	4.63325	1.27439	0.056905
ENSMUSG00000026189	Pecr	3254.89	3725.73	3799.02	3262.31	4268.22	3522.84	4177.46	4217.27	3510.49	4046.45	-0.204606	0.0570708
ENSMUSG00000054161	Fam83e	0	5.76293	10.9288	0	0	0.920043	0	1.22204	4.17293	0.535521	3.08183	0.0571637
ENSMUSG00000037325	Bbs7	80.4357	70.1156	73.1388	71.2057	53.8716	66.2431	52.8288	48.8817	73.7239	55.4563	0.40453	0.0573205
ENSMUSG00000047428	Dlk2	0	0	0	0	0	4.60021	2.99031	1.22204	0	2.20314	-3.5955	0.0573336
ENSMUSG00000030109	Slc6a12	1246.2	1101.68	1137.43	1364.96	1403.31	1312.9	1530.04	1355.25	1212.57	1400.38	-0.208531	0.0573645
ENSMUSG00000049709	Nlrp10	12.1204	2.88146	5.88473	5.47736	2.64942	2.76013	1.99354	1.22204	6.591	2.15628	1.57279	0.057591
ENSMUSG00000074489	Bglap3	2.20372	5.76293	5.04406	5.47736	1.76628	1.84009	0.99677	0	4.62201	1.15078	1.94345	0.0576053
ENSMUSG00000000142	Axin2	308.52	273.739	274.901	247.577	282.605	191.369	232.247	173.53	276.184	219.938	0.324446	0.0577124
ENSMUSG00000034780	B3galt1	373.53	287.186	219.416	232.24	377.101	210.69	478.45	1253.82	278.093	580.014	-1.06002	0.0578426
ENSMUSG00000085663	Gm15718	0	0	0	1.09547	3.53257	0.920043	3.98708	1.22204	0.273868	2.41543	-3.01296	0.0578908
ENSMUSG00000027555	Car13	17.6297	24.9727	16.8135	12.0502	8.83142	10.1205	13.9548	6.11022	17.8665	9.75422	0.866266	0.0578988
ENSMUSG00000001774	Chordc1	1023.63	965.29	796.961	820.508	848.699	1046.09	1052.59	1671.76	901.597	1154.78	-0.356039	0.0580188
ENSMUSG00000020067	Mypn	1.10186	0	0	1.09547	5.29885	0	3.98708	4.88817	0.549333	3.54353	-2.79871	0.0581544
ENSMUSG00000060176	Kif27	8.81487	1.92098	6.72541	2.19094	2.64942	0.920043	0.99677	0	4.91305	1.14156	2.03564	0.0582767
ENSMUSG00000096105	Bhmt-ps1	301.909	315.04	257.247	249.768	290.554	340.416	341.892	384.944	280.991	339.451	-0.270552	0.0583289
ENSMUSG00000022364	Tbc1d31	347.085	364.985	341.314	411.897	264.059	296.254	381.763	248.075	366.321	297.538	0.29814	0.0583742
ENSMUSG00000025260	Hsd17b10	6376.46	7137.38	6696.83	5284.55	7564.99	7113.77	6625.53	8947.8	6373.81	7563.02	-0.246574	0.0584133
ENSMUSG00000109945	Gm45601	0	0	0	0	3.53257	2.76013	1.99354	0	0	2.07156	-3.52415	0.0584994
ENSMUSG00000035439	Haus8	256.733	298.712	337.952	276.059	229.617	299.934	223.277	124.648	292.364	219.369	0.411006	0.0585143
ENSMUSG00000031561	Tenm3	1106.27	921.108	917.178	1264.17	939.663	1013.89	777.481	706.341	1052.18	859.343	0.290133	0.0586376
ENSMUSG00000051503	Gm6583	5.50929	3.84195	6.72541	5.47736	1.76628	1.84009	1.99354	1.22204	5.3885	1.70549	1.64806	0.0586455
ENSMUSG00000027332	Ivd	4131.97	4180.04	4936.45	3840.72	5100.14	4740.98	4837.33	4883.28	4272.3	4890.43	-0.194666	0.0586636
ENSMUSG00000032009	Sesn3	472.697	510.019	485.911	572.932	424.791	466.462	445.556	415.495	510.39	438.076	0.218951	0.0586716
ENSMUSG00000024158	Hagh	5189.75	5678.4	6352.15	5567.19	7323.01	5909.43	6222.84	6826.33	5696.87	6570.4	-0.205631	0.0587501
ENSMUSG00000032366	Tpm1	990.571	1006.59	849.083	895	809.841	908.082	771.5	718.561	935.311	801.996	0.22027	0.058854
ENSMUSG00000029864	Gstk1	2858.22	3382.84	3068.47	3084.85	3499.89	3204.51	3522.59	3989.97	3098.59	3554.24	-0.197456	0.0589064
ENSMUSG00000090124	Ugt1a7c	36.3613	19.2098	33.627	33.9596	22.9617	19.3209	18.9386	17.1086	30.7894	19.5825	0.642871	0.0590907
ENSMUSG00000032816	Igdcc4	8.81487	4.80244	6.72541	5.47736	6.18199	24.8412	16.9451	7.33226	6.45502	13.8251	-1.11117	0.0595713
ENSMUSG00000020897	Aurkb	14.3242	7.6839	16.8135	15.3366	8.83142	5.52026	6.97739	6.11022	13.5395	6.85982	0.974235	0.0596497
ENSMUSG00000021696	Elovl7	27.5465	18.2493	34.4677	29.5777	10.5977	31.2815	9.9677	8.5543	27.4603	15.1003	0.848559	0.0598323
ENSMUSG00000111055	D030034A15Rik	4.40743	0.960488	5.04406	5.47736	0.883142	0	0	2.44409	3.97233	0.831807	2.36119	0.0598482
ENSMUSG00000097136	Gm26772	3.30558	9.60488	5.88473	10.9547	1.76628	2.76013	4.98385	1.22204	7.43748	2.68308	1.45614	0.0599104
ENSMUSG00000064364	mt-Th	51.7874	67.2341	37.8304	38.3415	11.4808	31.2815	35.8837	43.9936	48.7984	30.6599	0.684722	0.060069
ENSMUSG00000103094	Gm37558	2.20372	5.76293	2.52203	0	0.883142	0	0	0	2.62217	0.220785	3.12692	0.0600939
ENSMUSG00000054792	Klhl18	289.789	253.569	239.593	264.009	216.37	257.612	184.403	200.415	261.74	214.7	0.281732	0.060399
ENSMUSG00000019920	Lims1	390.058	409.168	368.216	394.37	342.659	329.375	349.866	326.286	390.453	337.047	0.210951	0.0606336
ENSMUSG00000100426	Gm4208	3.30558	4.80244	5.04406	2.19094	2.64942	0	0	0	3.83575	0.662356	2.43681	0.0609276
ENSMUSG00000029314	Gpat3	306.317	341.934	254.725	241.004	244.63	256.692	213.309	219.968	285.995	233.65	0.289803	0.0609562
ENSMUSG00000037913	Tmem156	17.6297	8.64439	6.72541	14.2411	4.41571	1.84009	3.98708	10.9984	11.8102	5.31032	1.18639	0.0612219
ENSMUSG00000041782	Lad1	190.622	213.228	159.728	190.612	211.071	264.052	239.225	205.303	188.548	229.913	-0.289706	0.0615438
ENSMUSG00000063696	Gm8730	117.899	143.113	174.02	178.562	202.239	204.249	183.406	174.752	153.398	191.162	-0.317388	0.0617038
ENSMUSG00000039585	Myo9a	135.529	174.809	159.728	159.939	91.8467	142.607	140.545	122.204	157.501	124.301	0.344243	0.0619037
ENSMUSG00000111528	Gm39460	3.30558	0.960488	4.20338	6.57283	0.883142	0	0.99677	1.22204	3.76057	0.775489	2.31363	0.0620774
ENSMUSG00000039670	Oxld1	298.604	376.511	407.728	342.883	316.165	321.095	287.07	262.739	356.431	296.767	0.264304	0.0622591
ENSMUSG00000026827	Gpd2	974.043	876.925	1002.93	1127.24	808.958	968.805	826.323	806.549	995.284	852.658	0.222258	0.06234
ENSMUSG00000085355	3010003L21Rik	5.50929	0.960488	5.88473	5.47736	8.83142	10.1205	7.97416	13.4425	4.45797	10.0921	-1.17282	0.062375
ENSMUSG00000027456	Sdcbp2	41.8706	41.301	58.8473	42.7234	21.1954	45.0821	36.8805	17.1086	46.1856	30.0666	0.613478	0.0624672
ENSMUSG00000041134	Cyyr1	66.1115	62.4317	85.749	76.683	98.9119	108.565	78.7449	92.8753	72.7438	94.7743	-0.380368	0.0624926
ENSMUSG00000083563	Gm13340	196.131	286.225	138.712	267.295	201.356	286.133	368.805	350.726	222.091	301.755	-0.442165	0.0625768
ENSMUSG00000046909	Tefm	210.455	267.016	227.823	194.994	245.513	247.491	277.102	345.838	225.072	278.986	-0.304202	0.0626123
ENSMUSG00000090305	Gm5459	0	0	0	0	1.76628	1.84009	0	4.88817	0	2.12364	-3.51821	0.0627709
ENSMUSG00000075025	Gm10804	59.5004	49.9454	46.2372	19.7185	32.6762	30.3614	30.8999	15.8866	43.8504	27.456	0.66559	0.0628423
ENSMUSG00000006389	Mpl	2.20372	1.92098	0	4.38189	0	0	0	0	2.12664	0	3.51751	0.0629741
ENSMUSG00000025911	Adhfe1	2551.9	2834.4	3010.46	2976.4	3001.8	3123.54	3370.08	3416.83	2843.29	3228.06	-0.182615	0.0630207
ENSMUSG00000025735	Rhbdl1	37.4632	21.1307	14.2915	31.7687	21.1954	15.6407	7.97416	14.6645	26.1635	14.8687	0.795433	0.0630246
ENSMUSG00000033377	Palmd	939.885	1130.49	1226.55	1074.66	920.234	946.724	1008.73	906.756	1092.9	945.611	0.209646	0.0630685
ENSMUSG00000062181	Ces3b	3561.21	2130.36	3129	2953.39	2610.57	3030.62	6321.52	7120.85	2943.49	4770.89	-0.696645	0.0631071
ENSMUSG00000021720	Rnf180	19.8335	22.0912	21.0169	33.9596	14.1303	17.4808	11.9612	15.8866	24.2253	14.8647	0.700144	0.0632809
ENSMUSG00000016529	Il10	2.20372	5.76293	5.88473	1.09547	1.76628	0.920043	0	0	3.73671	0.671581	2.40093	0.0634034
ENSMUSG00000089736	Tgfbr3l	40.7688	41.301	33.627	48.2007	28.2605	23.0011	30.8999	31.7731	40.9744	28.4837	0.525137	0.0635094
ENSMUSG00000087141	Plcxd2	1684.74	1223.66	1555.25	1379.2	1206.37	1481.27	2401.22	2611.51	1460.71	1925.09	-0.397693	0.063617
ENSMUSG00000112614	Gm9030	11.0186	17.2888	16.8135	24.1004	34.4425	24.8412	26.9128	23.2188	17.3053	27.3538	-0.667702	0.0637995
ENSMUSG00000046876	Atxn1	206.048	180.572	153.003	194.994	169.563	299.014	211.315	259.073	183.654	234.741	-0.355115	0.0638058
ENSMUSG00000068085	Cyp2d11	22.0372	112.377	62.21	25.1958	47.6896	17.4808	23.9225	32.9952	55.455	30.522	0.866203	0.0641313
ENSMUSG00000113196	AC159193.2	4.40743	1.92098	2.52203	3.28641	0.883142	0	0.99677	0	3.03421	0.469978	2.60061	0.0642979
ENSMUSG00000105315	Gm18635	31.9539	38.4195	31.9457	35.0551	21.1954	11.0405	26.9128	30.5511	34.3435	22.4249	0.63139	0.0643584
ENSMUSG00000052934	Fbxo31	3237.26	2428.11	2890.24	2090.16	3397.45	3391.28	2485.95	3862.88	2661.44	3284.39	-0.303228	0.0645684
ENSMUSG00000021123	Rdh12	0	0	3.3627	0	5.29885	3.68017	7.97416	1.22204	0.840676	4.54381	-2.31744	0.0646728
ENSMUSG00000082029	H3f3c	46.2781	42.2615	53.8033	73.3966	44.1571	34.9616	27.9096	43.9936	53.9348	37.7555	0.514311	0.0647699
ENSMUSG00000000567	Sox9	103.575	87.4044	110.969	76.683	114.808	115.005	124.596	125.87	94.6578	120.07	-0.337364	0.0648028
ENSMUSG00000025203	Scd2	191.723	196.9	206.806	180.753	164.264	146.287	194.37	112.428	194.046	154.337	0.326823	0.064842
ENSMUSG00000009108	Gnat2	19.8335	11.5259	12.6101	16.4321	11.4808	7.36034	6.97739	6.11022	15.1004	7.9822	0.893935	0.0649205
ENSMUSG00000079523	Tmsb10	258.937	367.867	497.68	318.782	299.385	322.015	278.099	219.968	360.817	279.867	0.366976	0.0649692
ENSMUSG00000027805	Pfn2	52.8892	77.7995	58.8473	50.3917	45.0402	48.7623	35.8837	45.2156	59.9819	43.7255	0.459061	0.0649911
ENSMUSG00000030737	Slco2b1	2803.13	2631.74	2613.66	2603.94	2973.54	3031.54	2876.68	2924.35	2663.12	2951.53	-0.148589	0.0650643
ENSMUSG00000037798	Mat1a	120869	112257	98894.6	89580	119424	112959	118837	143259	105400	123620	-0.230023	0.0650653
ENSMUSG00000030207	Fam234b	712.903	527.308	488.433	417.375	624.381	606.308	644.91	779.664	536.504	663.816	-0.306802	0.0651531
ENSMUSG00000025525	Apool	402.178	559.964	495.158	477.626	601.419	522.584	561.182	601.245	483.732	571.608	-0.239053	0.0651541
ENSMUSG00000073460	Pnldc1	444.049	406.286	440.514	545.545	377.101	401.139	431.602	314.065	459.099	380.977	0.266152	0.0652877
ENSMUSG00000092286	Dtnbos	0	0	0	0	1.76628	2.76013	0	3.66613	0	2.04814	-3.47555	0.0653317
ENSMUSG00000101942	Gm19582	1.10186	0	12.6101	3.28641	0.883142	0.920043	0.99677	0	4.2496	0.699989	2.57464	0.0655757
ENSMUSG00000036744	Olfr701	0	0	0	1.09547	0	0	3.98708	8.5543	0.273868	3.13535	-3.35032	0.0655783
ENSMUSG00000072115	Ang	3135.89	3424.14	2807.86	2829.6	3136.04	2829.13	3439.85	6953.43	3049.37	4089.61	-0.423099	0.0655939
ENSMUSG00000036461	Elf1	398.873	380.353	385.87	388.892	273.774	350.536	327.937	367.835	388.497	330.021	0.237752	0.0656525
ENSMUSG00000055730	Ces2a	1386.14	1439.77	1817.54	1565.43	1725.66	1539.23	1943.7	2214.34	1552.22	1855.73	-0.256555	0.0656849
ENSMUSG00000084659	Gm22720	3.30558	3.84195	2.52203	2.19094	0.883142	0.920043	0	0	2.96512	0.450796	2.59118	0.0657889
ENSMUSG00000025271	Pfkfb1	770.199	820.256	715.415	526.922	685.318	864.84	990.79	947.084	708.198	872.008	-0.298996	0.0658141
ENSMUSG00000033713	Foxn3	684.254	631.04	717.937	737.252	832.803	785.716	750.568	789.44	692.621	789.632	-0.189507	0.065895
ENSMUSG00000082431	Tdpx-ps1	4.40743	4.80244	5.88473	7.6683	0.883142	0	3.98708	2.44409	5.69073	1.82858	1.68036	0.0659129
ENSMUSG00000086124	A530076I17Rik	0	0.960488	0	0	1.76628	2.76013	0.99677	3.66613	0.240122	2.29733	-2.91713	0.0659827
ENSMUSG00000029096	Htra3	156.464	116.219	198.4	127.075	136.004	126.046	94.6932	98.9855	149.539	113.932	0.391219	0.0659978
ENSMUSG00000029851	Tcaf2	29.7502	31.6961	33.627	30.6732	20.3123	17.4808	26.9128	19.5527	31.4366	21.0646	0.580688	0.066011
ENSMUSG00000085249	Gm12847	0	5.76293	1.68135	0	7.94827	4.60021	7.97416	4.88817	1.86107	6.35271	-1.73055	0.0661474
ENSMUSG00000098068	Gm7909	0	0	0	0	0.883142	0.920043	1.99354	3.66613	0	1.86571	-3.32644	0.0663377
ENSMUSG00000037053	Azgp1	30397	30682.8	29377.4	28496.5	33955.9	30272.2	32385.1	38245.1	29738.4	33714.6	-0.180999	0.0663484
ENSMUSG00000097597	Gm26674	1.10186	1.92098	1.68135	1.09547	1.76628	2.76013	2.99031	14.6645	1.44991	5.54531	-1.87633	0.0664152
ENSMUSG00000037808	Fam76b	172.992	174.809	113.491	178.562	92.7299	119.606	159.483	116.094	159.963	121.978	0.389026	0.0667273
ENSMUSG00000027347	Rasgrp1	34.1576	42.2615	56.3253	56.9645	34.4425	41.4019	24.9193	30.5511	47.4272	32.8287	0.529083	0.0670951
ENSMUSG00000017344	Vtn	32993	32351.1	31559	32394.2	36411.9	35743.7	32767.8	40312.8	32324.3	36309	-0.167686	0.0672187
ENSMUSG00000070720	Tmem200b	168.584	110.456	152.162	123.788	135.121	106.725	106.654	56.214	138.748	101.179	0.446961	0.0673138
ENSMUSG00000040473	Cfap69	25.3428	16.3283	20.1762	4.38189	4.41571	9.20043	9.9677	9.77635	16.5573	8.34005	1.00506	0.0673299
ENSMUSG00000030518	Fam189a1	7.71301	3.84195	5.04406	8.76377	1.76628	2.76013	0.99677	3.66613	6.3407	2.29733	1.47946	0.0674174
ENSMUSG00000070354	Evi2	5.50929	2.88146	10.9288	3.28641	0	4.60021	0	1.22204	5.65149	1.45556	1.95487	0.0674976
ENSMUSG00000083878	Gm12034	0	3.84195	5.04406	1.09547	4.41571	4.60021	8.97093	12.2204	2.49537	7.55182	-1.51905	0.0675052
ENSMUSG00000000326	Comt	441.845	426.457	467.416	548.831	532.534	567.666	539.253	549.919	471.137	547.343	-0.217037	0.067674
ENSMUSG00000053063	Clec12a	105.778	184.414	232.867	136.934	127.172	138.926	121.606	106.318	164.998	123.506	0.420818	0.0677129
ENSMUSG00000020122	Egfr	2052.76	1263.04	785.191	1142.58	1258.48	1155.57	2323.47	8120.48	1310.89	3214.5	-1.294	0.0677736
ENSMUSG00000030104	Edem1	2626.83	2723.94	2484.2	2688.29	2822.52	2893.53	2792.95	3608.69	2630.81	3029.42	-0.2031	0.0678661
ENSMUSG00000104164	Gm38248	3.30558	5.76293	9.24744	8.76377	10.5977	9.20043	22.9257	12.2204	6.76993	13.7361	-1.00499	0.0679305
ENSMUSG00000102418	Sh2d1b1	9.91673	6.72341	10.9288	10.9547	5.29885	1.84009	7.97416	1.22204	9.63091	4.08379	1.21378	0.0681791
ENSMUSG00000087695	Gm16291	19.8335	12.4863	9.24744	12.0502	7.06513	1.84009	12.958	2.44409	13.4044	6.07683	1.12084	0.0683159
ENSMUSG00000080772	Gm12543	2.20372	1.92098	0.840676	2.19094	0	0	0	0	1.78908	0	3.27462	0.0684297
ENSMUSG00000044197	Gpr146	2411.97	2260.03	2538.84	2485.62	2663.56	2715.05	2846.78	2599.29	2424.12	2706.17	-0.158863	0.0688567
ENSMUSG00000085708	Gm16063	1.10186	3.84195	5.88473	4.38189	14.1303	1.84009	11.9612	10.9984	3.80261	9.7325	-1.32921	0.0689464
ENSMUSG00000026384	Ptpn4	186.214	216.11	184.949	198.28	136.887	174.808	179.419	156.422	196.388	161.884	0.279085	0.0690222
ENSMUSG00000082321	Gm14253	27.5465	44.1824	41.1931	42.7234	45.0402	58.8827	46.8482	68.4344	38.9114	54.8014	-0.482494	0.069164
ENSMUSG00000097239	Gm27029	0	0	0	1.09547	0.883142	3.68017	1.99354	2.44409	0.273868	2.25023	-2.89683	0.0692512
ENSMUSG00000031298	Adgrg2	69.4171	59.5502	74.8202	110.643	60.9368	48.7623	65.7868	54.9919	78.6075	57.6195	0.443975	0.0692704
ENSMUSG00000081249	Gm11517	0	2.88146	2.52203	4.38189	0	0	0.99677	0	2.44634	0.249193	3.01867	0.0694461
ENSMUSG00000031870	Pgr	1.10186	0	0	0	2.64942	2.76013	0.99677	2.44409	0.275465	2.2126	-2.87837	0.0694645
ENSMUSG00000024660	Incenp	47.3799	64.3527	70.6168	62.4419	52.9885	46.9222	48.8417	21.9968	61.1978	42.6873	0.508962	0.0695473
ENSMUSG00000003934	Efnb3	0	0.960488	0.840676	1.09547	2.64942	0.920043	1.99354	9.77635	0.724159	3.83484	-2.34492	0.0695634
ENSMUSG00000037386	Rims2	5.50929	0.960488	4.20338	9.85924	0	3.68017	0.99677	0	5.1331	1.16924	2.07544	0.0697499
ENSMUSG00000066072	Cyp4a10	24368.7	22559.9	15935	16412.4	19783.3	23148.3	24749.8	30303	19819	24496.1	-0.305646	0.069783
ENSMUSG00000010064	Slc38a3	29119.9	26343.3	31703.6	29757.4	36599.2	31087.3	32848.6	31864.8	29231	33100	-0.179335	0.0698501
ENSMUSG00000001025	S100a6	62.8059	75.8785	99.1998	63.5374	59.1705	62.5629	56.8159	46.4376	75.3554	56.2467	0.423849	0.0700584
ENSMUSG00000005493	Msh4	0	0	0	0	0	2.76013	6.97739	0	0	2.43438	-3.74059	0.0701824
ENSMUSG00000029445	Hpd	42298.2	45803.7	46832.4	34786.7	57994.1	42000.9	47375.5	53475.4	42430.2	50211.5	-0.242902	0.0705029
ENSMUSG00000030278	Cidec	4416.25	3528.83	4300.06	4542.92	2618.52	4874.39	3029.18	2854.69	4197.02	3344.19	0.327514	0.0705481
ENSMUSG00000101823	Gm29438	17.6297	8.64439	12.6101	14.2411	3.53257	9.20043	9.9677	3.66613	13.2814	6.59171	0.993043	0.0706074
ENSMUSG00000107411	Gm19040	3.30558	2.88146	1.68135	4.38189	1.76628	0	0	0	3.06257	0.441571	2.63563	0.0706239
ENSMUSG00000082676	Gm11843	47.3799	54.7478	37.8304	28.4823	22.0785	43.242	26.9128	15.8866	42.1101	27.03	0.62851	0.0707685
ENSMUSG00000030774	Pak1	95.8617	76.839	97.5184	74.4921	70.6513	70.8433	68.7772	54.9919	86.1778	66.3159	0.373826	0.070828
ENSMUSG00000078597	Cyp4a12b	35.2595	39.38	47.0779	36.1506	28.2605	61.6429	26.9128	354.393	39.467	117.802	-1.5746	0.0712381
ENSMUSG00000096687	Mfsd4b4	102.473	84.5229	79.0236	86.5423	112.159	95.6844	122.603	112.428	88.1404	110.719	-0.331794	0.0713742
ENSMUSG00000079481	Nhsl2	36.3613	31.6961	44.5558	36.1506	39.7414	57.0426	61.7998	48.8817	37.191	51.8664	-0.474577	0.0715226
ENSMUSG00000041120	Nbl1	60.6022	65.3132	88.271	30.6732	62.7031	39.5618	18.9386	32.9952	61.2149	38.5497	0.665595	0.0716016
ENSMUSG00000115846	AC107711.6	0	1.92098	1.68135	1.09547	4.41571	0.920043	3.98708	9.77635	1.17445	4.77479	-1.9543	0.0717485
ENSMUSG00000114617	AC140397.1	3.30558	2.88146	1.68135	0	0	0	0	0	1.9671	0	3.42384	0.0718443
ENSMUSG00000104927	Gm43388	5.50929	1.92098	0.840676	1.09547	0	0	0.99677	0	2.3416	0.249193	2.93503	0.0719356
ENSMUSG00000063687	Pcdhb5	7.71301	2.88146	5.04406	1.09547	0.883142	0	1.99354	1.22204	4.1835	1.02468	2.06018	0.0722149
ENSMUSG00000015656	Hspa8	27011	24581.8	23143	21660.8	21991.1	29623.5	26442.3	40827.2	24099.1	29721.1	-0.302459	0.0722231
ENSMUSG00000097368	Gm10390	1.10186	8.64439	7.56608	2.19094	0.883142	0	1.99354	2.44409	4.87582	1.33019	1.95376	0.0722819
ENSMUSG00000023349	Clec4n	85.945	170.967	147.959	99.6879	79.4827	102.125	108.648	86.7651	126.14	94.2551	0.425102	0.0723383
ENSMUSG00000012705	Retn	4.40743	6.72341	4.20338	0	1.76628	0.920043	0	0	3.83356	0.671581	2.43319	0.0723715
ENSMUSG00000089686	Mnd1-ps	0	0.960488	0	12.0502	0.883142	0	0	0	3.25267	0.220785	3.41185	0.0723806
ENSMUSG00000006345	Ggt1	1.10186	6.72341	5.88473	1.09547	1.76628	0.920043	0	0	3.70137	0.671581	2.39282	0.0723851
ENSMUSG00000038764	Ptpn3	601.615	658.895	550.643	512.681	612.9	649.55	665.843	823.657	580.958	687.988	-0.241956	0.0724852
ENSMUSG00000072664	Ugt3a1	1735.43	1928.66	1602.33	1910.5	1976.47	1661.6	2316.49	2687.27	1794.23	2160.46	-0.267488	0.0725468
ENSMUSG00000108660	Gm21284	9.91673	3.84195	13.4508	8.76377	1.76628	5.52026	1.99354	6.11022	8.99332	3.84757	1.25655	0.0725656
ENSMUSG00000097388	Gm3200	12.1204	7.6839	15.1322	13.1457	7.94827	7.36034	4.98385	3.66613	12.0205	5.98965	0.982973	0.0725742
ENSMUSG00000047730	Fcgbp	7.71301	18.2493	26.9016	1.09547	0.883142	3.68017	0.99677	13.4425	13.4898	4.75064	1.56778	0.0726451
ENSMUSG00000113737	BB123696	2.20372	0.960488	2.52203	0	1.76628	10.1205	1.99354	7.33226	1.42156	5.30314	-1.86123	0.0726479
ENSMUSG00000002983	Relb	123.408	131.587	158.888	134.743	130.705	126.046	93.6964	58.6581	137.156	102.276	0.41578	0.0728113
ENSMUSG00000018427	Ypel2	245.714	240.122	220.257	178.562	173.979	224.49	161.477	151.533	221.164	177.87	0.311432	0.0728581
ENSMUSG00000024211	Grm8	2.20372	4.80244	4.20338	4.38189	15.0134	3.68017	6.97739	10.9984	3.89786	9.16734	-1.22288	0.0728709
ENSMUSG00000096108	Ighv11-2	0	2.88146	0	17.5275	1.76628	0	0.99677	0	5.10225	0.690763	2.82068	0.0729573
ENSMUSG00000020400	Tnip1	290.891	293.909	353.925	316.591	272.008	295.334	243.212	251.741	313.829	265.574	0.240791	0.0730793
ENSMUSG00000082087	Gm12138	1.10186	1.92098	1.68135	2.19094	5.29885	5.52026	5.98062	3.66613	1.72378	5.11646	-1.57607	0.073195
ENSMUSG00000097926	Gm26575	2.20372	2.88146	2.52203	1.09547	0	0.920043	0	0	2.17567	0.230011	2.85482	0.073203
ENSMUSG00000098076	Gm6981	4.40743	9.60488	6.72541	8.76377	15.0134	3.68017	26.9128	15.8866	7.37537	15.3732	-1.05154	0.0733206
ENSMUSG00000031842	Pde4c	58.3985	66.2737	48.7592	66.8238	132.471	62.5629	84.7255	57.436	60.0638	84.2989	-0.498545	0.0733568
ENSMUSG00000032377	Plscr4	146.547	174.809	175.701	217.999	119.224	149.967	172.441	128.315	178.764	142.487	0.326323	0.0733937
ENSMUSG00000102148	Gm38059	1.10186	1.92098	1.68135	2.19094	0	0	0	0	1.72378	0	3.23293	0.0734553
ENSMUSG00000080002	Gm5566	2.20372	0.960488	2.52203	4.38189	6.18199	4.60021	5.98062	9.77635	2.51703	6.63479	-1.39887	0.073564
ENSMUSG00000101356	Gm28876	0	1.92098	0	1.09547	3.53257	2.76013	3.98708	3.66613	0.754112	3.48648	-2.22067	0.0740016
ENSMUSG00000064356	mt-Atp8	168.584	174.809	154.684	169.798	119.224	754.435	313.983	172.308	166.969	339.987	-1.02642	0.0749332
ENSMUSG00000057346	Apol9a	1717.8	1660.68	2194.16	1852.44	2720.08	1956.93	1970.61	2180.13	1856.27	2206.94	-0.249479	0.0749777
ENSMUSG00000113616	Gm45941	1.10186	2.88146	1.68135	4.38189	5.29885	7.36034	4.98385	8.5543	2.51164	6.54934	-1.38678	0.0749859
ENSMUSG00000041237	Pklr	9434.11	7419.77	7652.67	8138.26	7244.41	8613.44	5939.75	4725.64	8161.2	6630.81	0.299353	0.0750521
ENSMUSG00000023073	Slc10a2	415.401	467.758	255.566	356.028	316.165	506.023	589.091	1037.51	373.688	612.199	-0.711598	0.0751169
ENSMUSG00000029368	Alb	1.10021e+06	1.24167e+06	851483	1.09269e+06	1.08072e+06	1.22182e+06	1.373e+06	1.38257e+06	1.07151e+06	1.26453e+06	-0.238946	0.0752516
ENSMUSG00000056749	Nfil3	364.715	339.052	257.247	201.567	368.27	321.095	290.06	559.696	290.645	384.78	-0.402703	0.0752792
ENSMUSG00000032353	Tmed3	290.891	297.751	325.342	287.014	355.906	305.454	346.876	411.829	300.249	355.016	-0.237568	0.0754241
ENSMUSG00000028980	H6pd	12351.8	9912.23	9351.68	10269	11316.6	12768.4	11048.2	13300.7	10471.2	12108.5	-0.209627	0.0755244
ENSMUSG00000064366	mt-Tl2	208.251	199.781	149.64	181.848	188.992	220.81	244.209	249.297	184.88	225.827	-0.288814	0.0755756
ENSMUSG00000023979	Guca1b	12.1204	3.84195	5.88473	4.38189	10.5977	14.7207	11.9612	13.4425	6.55725	12.6805	-0.96421	0.0756106
ENSMUSG00000039286	Fndc3b	599.411	610.87	627.985	620.037	604.069	739.714	662.852	911.644	614.576	729.57	-0.245283	0.0756142
ENSMUSG00000114926	AC124581.4	0	0	0.840676	0	3.53257	2.76013	2.99031	0	0.210169	2.32075	-2.96834	0.0762481
ENSMUSG00000030317	Timp4	5.50929	0	3.3627	1.09547	0	0.920043	0	0	2.49187	0.230011	3.03865	0.0763621
ENSMUSG00000038879	Nipal2	15.426	6.72341	8.40676	7.6683	2.64942	0.920043	8.97093	3.66613	9.55612	4.05163	1.24471	0.077025
ENSMUSG00000019883	Echdc1	251.224	296.791	247.999	276.059	293.203	268.652	387.744	343.394	268.018	323.248	-0.268664	0.077032
ENSMUSG00000085087	Gm13528	8.81487	5.76293	0.840676	8.76377	2.64942	1.84009	1.99354	1.22204	6.04556	1.92627	1.6054	0.0773014
ENSMUSG00000082925	Gm13135	9.91673	5.76293	10.0881	5.47736	9.71456	17.4808	10.9645	20.7747	7.81128	14.7336	-0.896042	0.0773367
ENSMUSG00000042357	Gjb5	8.81487	0.960488	0	1.09547	0.883142	0	0	0	2.71771	0.220785	3.14572	0.0773639
ENSMUSG00000103749	Pcdhgb5	2.20372	2.88146	0	3.28641	1.76628	5.52026	6.97739	10.9984	2.0929	6.31558	-1.61005	0.0774299
ENSMUSG00000040187	Arntl2	15.426	20.1702	8.40676	27.3868	11.4808	5.52026	15.9483	2.44409	17.8475	8.84838	0.984073	0.0775315
ENSMUSG00000035836	Ugt2b1	3042.23	3430.86	3332.44	3573.43	3495.47	3277.19	3862.48	5732.61	3344.74	4091.94	-0.290464	0.0777465
ENSMUSG00000020473	Aebp1	164.177	156.559	203.444	118.311	170.446	133.406	90.7061	76.9887	160.623	117.887	0.441921	0.0778446
ENSMUSG00000105519	E430021H15Rik	4.40743	2.88146	2.52203	4.38189	0	0.920043	0	2.44409	3.5482	0.841032	2.18605	0.0778619
ENSMUSG00000031740	Mmp2	155.362	108.535	189.152	152.271	125.406	129.726	128.583	80.6549	151.33	116.093	0.378092	0.0779153
ENSMUSG00000100819	Gm2693	1.10186	4.80244	1.68135	1.09547	8.83142	2.76013	4.98385	8.5543	2.17028	6.28242	-1.50635	0.0780566
ENSMUSG00000078427	Sarnp	58.3985	118.14	61.3694	39.437	85.6647	113.165	58.8094	166.198	69.3362	105.959	-0.604472	0.0780859
ENSMUSG00000032443	Zcwpw2	5.50929	2.88146	3.3627	7.6683	0	0	1.99354	3.66613	4.85544	1.41492	1.87501	0.0782388
ENSMUSG00000069755	Zfp125	35.2595	48.0244	29.4237	46.0098	43.2739	45.0821	43.8579	109.984	39.6793	60.5495	-0.599725	0.0783214
ENSMUSG00000000078	Klf6	448.456	384.195	319.457	366.983	288.787	356.977	294.047	332.396	379.773	318.052	0.25455	0.0783338
ENSMUSG00000022377	Asap1	445.151	416.852	398.48	467.766	415.077	368.937	333.918	366.613	432.062	371.136	0.216796	0.0783974
ENSMUSG00000035237	Lcat	7774.72	7449.54	7774.57	6937.62	9626.24	8268.42	7545.55	8512.75	7484.11	8488.24	-0.181645	0.0784477
ENSMUSG00000099481	Xndc1	49.5836	45.1429	30.2643	37.246	23.8448	23.0011	40.8676	21.9968	40.5592	27.4276	0.55758	0.0784891
ENSMUSG00000022010	Tsc22d1	1660.5	2819.03	2682.6	3229.45	2394.2	1897.13	2425.14	1167.05	2597.9	1970.88	0.398145	0.0785037
ENSMUSG00000030871	Ears2	297.502	264.134	316.935	262.913	335.594	311.894	322.954	370.279	285.371	335.18	-0.22881	0.0785334
ENSMUSG00000059689	Zfp637	265.548	283.344	236.23	244.29	302.918	287.973	274.112	355.615	257.353	305.154	-0.243701	0.0787466
ENSMUSG00000031517	Gpm6a	83.7413	124.863	57.166	51.4872	51.2222	65.323	56.8159	50.1038	79.3145	55.8662	0.503846	0.0787681
ENSMUSG00000042842	Serpinb6b	91.4543	139.271	130.305	105.165	90.9636	93.8444	83.7287	101.43	116.549	92.4916	0.340844	0.0789954
ENSMUSG00000086003	B230206L02Rik	65.0097	43.2219	40.3525	55.869	63.5862	52.4424	82.7319	78.2108	51.1133	69.2428	-0.441535	0.0791328
ENSMUSG00000027313	Chac1	115.695	48.9849	87.4303	77.7785	73.3008	90.1642	95.69	250.519	82.4722	127.418	-0.622207	0.079185
ENSMUSG00000053740	Gm6457	60.6022	29.7751	57.166	58.06	32.6762	37.7217	23.9225	47.6597	51.4008	35.495	0.540142	0.0793937
ENSMUSG00000053289	Ddx10	165.279	215.149	180.745	176.371	208.421	198.729	210.319	293.29	184.386	227.69	-0.298303	0.0794585
ENSMUSG00000025724	Sec11a	881.487	913.424	764.175	798.599	894.623	882.321	989.793	1124.28	839.421	972.754	-0.211671	0.0795135
ENSMUSG00000067225	Cyp2c54	337.169	832.743	904.567	471.053	1131.3	535.465	959.89	2160.57	636.383	1196.81	-0.910626	0.0795247
ENSMUSG00000031444	F10	6294.92	6968.34	6454.71	6695.52	7682.45	6922.4	7067.1	7670.77	6603.37	7335.68	-0.15165	0.0797271
ENSMUSG00000030793	Pycard	34.1576	49.9454	53.8033	35.0551	24.728	35.8817	35.8837	24.4409	43.2403	30.2336	0.520673	0.0798027
ENSMUSG00000050234	Gja4	144.343	116.219	211.85	176.371	163.381	258.532	192.377	224.856	162.196	209.786	-0.368091	0.0798357
ENSMUSG00000112709	Gm19395	1.10186	0.960488	2.52203	0	2.64942	2.76013	5.98062	6.11022	1.14609	4.3751	-1.85179	0.079952
ENSMUSG00000022351	Sqle	157.566	260.292	188.311	364.792	242.864	286.133	430.605	349.504	242.74	327.277	-0.431209	0.0800274
ENSMUSG00000069520	Tmem19	2649.97	2847.85	2653.17	2715.67	2973.54	2842.01	2945.46	3518.26	2716.67	3069.82	-0.175796	0.080049
ENSMUSG00000020572	Nampt	1474.29	1754.81	1868.82	1355.1	1786.6	1643.2	2254.69	1976.04	1613.25	1915.13	-0.246599	0.0801489
ENSMUSG00000069272	Hist1h2ae	18.7316	13.4468	12.6101	9.85924	3.53257	7.36034	10.9645	7.33226	13.662	7.29741	0.912486	0.0803175
ENSMUSG00000062785	Kcnc3	178.501	145.994	121.057	179.657	177.511	190.449	234.241	172.308	156.302	193.627	-0.31469	0.0804498
ENSMUSG00000029279	Brdt	18.7316	24.0122	17.6542	20.814	8.83142	9.20043	10.9645	20.7747	20.303	12.4428	0.73621	0.080473
ENSMUSG00000031848	Lsm4	225.881	323.684	339.633	257.436	393.881	482.102	231.251	375.167	286.659	370.6	-0.369249	0.0805446
ENSMUSG00000068877	Selenbp2	287.585	362.104	534.67	560.881	474.247	522.584	531.279	724.672	436.31	563.195	-0.366225	0.0806074
ENSMUSG00000027612	Mmp24	5.50929	3.84195	1.68135	6.57283	1.76628	0.920043	1.99354	0	4.40136	1.16997	1.84002	0.0807333
ENSMUSG00000087721	Gm26280	1.10186	7.6839	1.68135	2.19094	0	0	1.99354	0	3.16451	0.498385	2.64858	0.0807396
ENSMUSG00000024799	Tm7sf2	1273.75	1648.2	1517.42	1635.54	1697.4	1780.28	1749.33	1705.97	1518.73	1733.25	-0.19042	0.0807696
ENSMUSG00000074358	Ccdc61	255.631	178.651	226.142	211.426	190.759	196.889	184.403	127.093	217.962	174.786	0.312421	0.0807833
ENSMUSG00000024563	Smad2	285.381	320.803	315.254	303.446	275.54	262.212	260.157	261.517	306.221	264.857	0.209962	0.0809956
ENSMUSG00000113613	Gm40893	3.30558	4.80244	2.52203	6.57283	9.71456	10.1205	4.98385	12.2204	4.30072	9.25983	-1.11723	0.0810281
ENSMUSG00000037787	Apopt1	364.715	437.022	423.701	352.742	377.985	318.335	330.928	320.175	394.545	336.856	0.228638	0.0811038
ENSMUSG00000042961	Egflam	18.7316	14.4073	18.4949	26.2913	16.7797	9.20043	13.9548	2.44409	19.4813	10.5947	0.84504	0.0811216
ENSMUSG00000100455	Gm29170	8.81487	12.4863	11.7695	16.4321	8.83142	0.920043	9.9677	3.66613	12.3757	5.84632	1.07035	0.0811937
ENSMUSG00000042029	Ncapg2	40.7688	47.0639	62.21	66.8238	40.6245	38.6418	46.8482	30.5511	54.2166	39.1664	0.465116	0.0812604
ENSMUSG00000024990	Rbp4	75685.6	73182.4	73739.1	69624.9	87036.3	73231.7	78627.2	89066.2	73058	81990.3	-0.1664	0.0813072
ENSMUSG00000020255	D10Wsu102e	323.946	331.368	295.918	292.491	367.387	370.777	313.983	400.83	310.931	363.244	-0.223385	0.0813392
ENSMUSG00000074623	Gm826	57.2967	42.2615	42.0338	44.9143	54.7548	49.6823	66.7836	81.8769	46.6266	63.2744	-0.435783	0.0814135
ENSMUSG00000041229	Phf8	243.511	197.86	191.674	166.512	181.044	193.209	235.238	519.368	199.889	282.215	-0.493658	0.0815821
ENSMUSG00000058258	Idi1	138.834	283.344	214.372	353.837	290.554	263.132	516.327	295.734	247.597	341.437	-0.463807	0.081686
ENSMUSG00000071652	Ints5	247.918	199.781	238.752	220.19	319.697	260.372	226.267	282.292	226.66	272.157	-0.264627	0.0817344
ENSMUSG00000018401	Mtmr4	1286.97	1296.66	1176.11	1223.64	1331.78	1416.87	1290.82	1669.31	1245.84	1427.19	-0.195307	0.0817457
ENSMUSG00000067736	Gm10222	263.344	125.824	123.579	235.526	177.511	243.811	314.979	526.701	187.068	315.751	-0.755252	0.0821147
ENSMUSG00000030162	Olr1	11.0186	0.960488	5.88473	7.6683	4.41571	0	0.99677	2.44409	6.38303	1.96414	1.6861	0.0824409
ENSMUSG00000040809	Chil3	28.6483	69.1551	30.2643	37.246	29.1437	29.4414	30.8999	18.3306	41.3285	26.9539	0.609405	0.0825295
ENSMUSG00000106099	Gm42664	13.2223	12.4863	15.1322	8.76377	5.29885	8.28038	7.97416	4.88817	12.4011	6.61039	0.906113	0.0826189
ENSMUSG00000028036	Ptgfr	34.1576	28.8146	15.9728	24.1004	11.4808	29.4414	9.9677	7.33226	25.7614	14.5555	0.799537	0.082768
ENSMUSG00000100257	C4bp-ps1	2.20372	2.88146	0	4.38189	0	0	0.99677	0	2.36677	0.249193	2.95016	0.082801
ENSMUSG00000081071	Gm9836	3.30558	6.72341	5.88473	2.19094	0.883142	3.68017	0	0	4.52617	1.14083	1.9321	0.0828508
ENSMUSG00000086165	Gm15690	41.8706	22.0912	28.583	82.1604	22.9617	31.2815	23.9225	30.5511	43.6763	27.1792	0.677981	0.0830365
ENSMUSG00000042834	Nrep	263.344	201.702	548.121	164.321	421.259	281.533	1071.53	520.59	294.372	573.728	-0.96189	0.0832917
ENSMUSG00000026479	Lamc2	34.1576	24.9727	32.7864	16.4321	17.6628	22.081	16.9451	12.2204	27.0872	17.2273	0.645219	0.0833288
ENSMUSG00000031389	Arhgap4	226.983	194.019	205.125	194.994	194.291	150.887	183.406	153.977	205.28	170.64	0.263379	0.0834297
ENSMUSG00000019558	Slc6a8	368.021	298.712	316.094	381.224	274.657	370.777	242.215	202.859	341.013	272.627	0.318301	0.0834767
ENSMUSG00000025212	Sfxn3	77.1301	81.6415	105.085	83.2558	69.7682	73.6034	75.7545	46.4376	86.778	66.3909	0.382051	0.0834775
ENSMUSG00000029816	Gpnmb	463.883	321.763	550.643	411.897	253.462	394.698	463.498	166.198	437.047	319.464	0.450778	0.0836548
ENSMUSG00000022498	Txndc11	581.781	526.347	520.378	635.374	627.914	596.188	624.975	819.991	565.97	667.267	-0.236611	0.0838182
ENSMUSG00000040209	Zfp704	229.187	206.505	226.983	304.541	203.123	226.33	202.344	144.201	241.804	194	0.311755	0.0839598
ENSMUSG00000029161	Cgref1	217.066	153.678	136.19	196.089	115.692	159.167	136.558	146.645	175.756	139.515	0.33001	0.0840497
ENSMUSG00000103925	B230112G18Rik	1.10186	0.960488	0	2.19094	6.18199	1.84009	6.97739	1.22204	1.06332	4.05538	-2.00707	0.0841131
ENSMUSG00000046532	Ar	381.243	349.618	296.759	259.627	255.228	299.934	279.096	229.744	321.812	266	0.272383	0.0843306
ENSMUSG00000033502	Cdc14a	58.3985	47.0639	41.1931	55.869	39.7414	27.6013	39.8708	40.3274	50.6311	36.8852	0.454498	0.0844141
ENSMUSG00000080205	Gm15526	1.10186	6.72341	2.52203	5.47736	1.76628	0	0.99677	1.22204	3.95616	0.996274	1.99661	0.0844942
ENSMUSG00000110148	5830408C22Rik	6.61115	2.88146	3.3627	1.09547	0	0.920043	1.99354	0	3.4877	0.728396	2.23421	0.0848322
ENSMUSG00000108352	Usf2-ps1	0	0.960488	0.840676	0	0.883142	6.4403	2.99031	1.22204	0.450291	2.88395	-2.57225	0.0848903
ENSMUSG00000033688	1300017J02Rik	8863.35	8736.6	8697.63	8646.56	9665.99	9196.75	9297.87	10268.8	8736.03	9607.36	-0.137058	0.084967
ENSMUSG00000053460	Ggcx	106.88	118.14	69.7761	110.643	22.9617	94.7644	40.8676	103.874	101.36	65.6168	0.632773	0.0850287
ENSMUSG00000057103	Nat8f1	1425.81	1559.83	1979.79	1866.68	2150.45	1538.31	2473.98	2097.03	1708.03	2064.94	-0.273377	0.0850662
ENSMUSG00000038357	Camp	0	1.92098	5.04406	0	1.76628	9.20043	0.99677	15.8866	1.74126	6.96251	-1.90949	0.0850788
ENSMUSG00000029250	Polr2b	801.051	899.016	798.642	885.141	872.544	865.76	1144.29	1049.74	845.963	983.083	-0.215968	0.0851721
ENSMUSG00000037681	Esyt3	1.10186	4.80244	1.68135	6.57283	0.883142	0	1.99354	0	3.53962	0.719171	2.25943	0.0852834
ENSMUSG00000030357	Fkbp4	4784.27	4411.52	4733.85	4435.56	6432.8	4865.19	4699.77	5143.58	4591.3	5285.34	-0.203204	0.085331
ENSMUSG00000021670	Hmgcr	436.336	387.077	433.789	568.55	444.22	540.065	603.046	609.8	456.438	549.283	-0.26688	0.0857232
ENSMUSG00000097567	Gm26637	2.20372	3.84195	5.04406	7.6683	1.76628	1.84009	1.99354	0	4.68951	1.39998	1.69052	0.0858978
ENSMUSG00000094417	Gm13243	1.10186	2.88146	4.20338	5.47736	0.883142	0	1.99354	0	3.41602	0.719171	2.21943	0.0859045
ENSMUSG00000088015	Mir1932	4.40743	0	1.68135	0	6.18199	5.52026	5.98062	2.44409	1.5222	5.03174	-1.7602	0.0859195
ENSMUSG00000035385	Ccl2	34.1576	41.301	75.6608	58.06	40.6245	37.7217	43.8579	18.3306	52.2949	35.1337	0.568246	0.0859306
ENSMUSG00000053040	Aph1c	6.61115	13.4468	10.9288	4.38189	15.8965	16.5608	15.9483	14.6645	8.84216	15.7675	-0.814981	0.0859789
ENSMUSG00000060147	Serpinb6a	409.891	538.834	475.823	415.184	371.803	409.419	423.627	367.835	459.933	393.171	0.227205	0.0860162
ENSMUSG00000047368	Abhd17b	298.604	261.253	315.254	265.104	264.059	315.575	382.76	433.825	285.054	349.055	-0.288047	0.0861446
ENSMUSG00000054400	Cklf	23.139	29.7751	40.3525	41.6279	30.91	21.161	23.9225	10.9984	33.7236	21.748	0.617695	0.0861706
ENSMUSG00000027323	Rad51	7.71301	13.4468	15.9728	21.9094	9.71456	6.4403	7.97416	8.5543	14.7605	8.17083	0.85525	0.0861999
ENSMUSG00000099618	Gm28118	1.10186	4.80244	1.68135	0	0	0	0	0	1.89641	0	3.38084	0.0863842
ENSMUSG00000030088	Aldh1l1	19775.1	19439.3	23087.5	18969.2	25878.7	22274.2	22259.9	21702.3	20317.8	23028.8	-0.180684	0.0865399
ENSMUSG00000036523	Greb1	1.10186	0	2.52203	1.09547	6.18199	8.28038	0.99677	2.44409	1.17984	4.47581	-1.90844	0.0865793
ENSMUSG00000089991	Gm16332	247.918	276.62	159.728	226.763	196.057	249.332	347.873	405.718	227.757	299.745	-0.394585	0.0865976
ENSMUSG00000113743	Gm8712	5.50929	4.80244	1.68135	1.09547	9.71456	4.60021	5.98062	10.9984	3.27214	7.82345	-1.26082	0.0867581
ENSMUSG00000097317	Gm17281	42.9725	30.7356	29.4237	36.1506	19.4291	25.7612	25.916	25.6629	34.8206	24.1923	0.523048	0.0868189
ENSMUSG00000046186	Cd109	6.61115	0	0	4.38189	0	0	0	1.22204	2.74826	0.305511	3.16179	0.0869372
ENSMUSG00000026368	F13b	3236.16	3824.66	3451.82	3845.11	3570.54	3712.37	4632.99	4768.41	3589.44	4171.08	-0.216345	0.0872225
ENSMUSG00000012429	Mplkip	257.835	250.687	272.379	221.285	294.969	295.334	296.041	279.848	250.547	291.548	-0.217506	0.0872306
ENSMUSG00000048752	Prss50	18.7316	24.0122	13.4508	9.85924	9.71456	8.28038	7.97416	12.2204	16.5135	9.54738	0.802475	0.0872809
ENSMUSG00000044156	Hepacam2	7.71301	8.64439	6.72541	0	0.883142	0.920043	1.99354	3.66613	5.7707	1.86571	1.69197	0.0872974
ENSMUSG00000059743	Fdps	20.9353	22.0912	16.8135	31.7687	22.9617	27.6013	41.8644	46.4376	22.9022	34.7162	-0.597264	0.0875235
ENSMUSG00000030243	Recql	110.186	140.231	113.491	153.366	110.393	100.285	99.677	107.54	129.319	104.474	0.306256	0.0875539
ENSMUSG00000019774	Mtrf1l	124.51	127.745	119.376	124.884	155.433	133.406	152.506	155.199	124.129	149.136	-0.264255	0.0876244
ENSMUSG00000041130	Zfp598	1659.4	1148.74	1363.58	1403.3	1866.08	1488.63	1731.39	1466.45	1393.75	1638.14	-0.233911	0.0876533
ENSMUSG00000069609	Cd300ld4	1.10186	0	0.840676	1.09547	3.53257	3.68017	1.99354	3.66613	0.759502	3.2181	-2.10777	0.087688
ENSMUSG00000026107	Nabp1	415.401	338.092	284.149	477.626	227.851	344.096	302.021	338.506	378.817	303.118	0.320899	0.0877635
ENSMUSG00000054764	Mtnr1a	73.8245	62.4317	56.3253	94.2106	85.6647	96.6045	92.6996	91.6532	71.698	91.6555	-0.362231	0.087817
ENSMUSG00000098363	Mir6993	0	0.960488	0.840676	1.09547	0	4.60021	5.98062	3.66613	0.724159	3.56174	-2.26962	0.0878314
ENSMUSG00000060969	Irx1	20.9353	17.2888	27.7423	33.9596	45.0402	14.7207	47.845	51.3258	24.9815	39.7329	-0.664145	0.0878993
ENSMUSG00000073599	Ecscr	56.1948	51.8663	69.7761	39.437	45.0402	32.2015	45.8514	35.4393	54.3186	39.6331	0.458566	0.0879133
ENSMUSG00000035337	Uchl4	4.40743	8.64439	4.20338	3.28641	9.71456	13.8006	11.9612	6.11022	5.1354	10.3967	-1.02217	0.0879141
ENSMUSG00000096959	4930509G22Rik	1.10186	0	1.68135	3.28641	2.64942	2.76013	6.97739	7.33226	1.51741	4.9298	-1.70061	0.0879209
ENSMUSG00000040990	Sh3kbp1	73.8245	70.1156	86.5896	69.0147	48.5728	63.4829	64.7901	56.214	74.8861	58.2649	0.366437	0.0880018
ENSMUSG00000004933	Matk	41.8706	28.8146	46.2372	38.3415	34.4425	31.2815	22.9257	17.1086	38.816	26.4396	0.539157	0.0880059
ENSMUSG00000040017	Saa4	6745.58	6547.64	6619.48	5983.47	6063.65	7456.95	9161.32	17844.3	6474.04	10131.5	-0.646052	0.0881328
ENSMUSG00000073555	Gm4951	1954.7	2172.62	1857.89	1974.04	1881.09	2101.38	2414.18	3139.43	1989.81	2384.02	-0.260091	0.0882402
ENSMUSG00000068349	Gml	5.50929	0.960488	1.68135	3.28641	0	0.920043	0.99677	0	2.85939	0.479203	2.49624	0.0882503
ENSMUSG00000025405	Inhbc	903.524	886.53	986.113	1097.66	1242.58	978.925	1030.66	1248.93	968.457	1125.27	-0.216196	0.088253
ENSMUSG00000025912	Mybl1	19.8335	30.7356	21.8576	40.5324	11.4808	15.6407	27.9096	15.8866	28.2398	17.7294	0.67118	0.0884151
ENSMUSG00000044211	Gm7887	141.038	100.851	105.925	97.497	124.523	138.006	143.535	142.979	111.328	137.261	-0.303157	0.0884481
ENSMUSG00000021629	Slc30a5	819.783	764.548	712.053	666.047	749.787	778.356	813.365	1311.25	740.608	913.19	-0.300596	0.0890339
ENSMUSG00000058579	Cela2a	4.40743	2.88146	1.68135	0	0	0	0	1.22204	2.24256	0.305511	2.88757	0.089155
ENSMUSG00000030424	Zfp939	31.9539	31.6961	27.7423	24.1004	44.1571	29.4414	44.8547	43.9936	28.8732	40.6117	-0.488418	0.0893648
ENSMUSG00000031712	Il15	38.5651	34.5776	31.105	46.0098	30.0268	23.9211	23.9225	28.107	37.5644	26.4944	0.497378	0.0895552
ENSMUSG00000030878	Cdr2	30.852	29.7751	44.5558	26.2913	26.4942	24.8412	19.9354	18.3306	32.8686	22.4004	0.552449	0.0896106
ENSMUSG00000022769	Sdf2l1	471.596	418.773	401.843	336.31	409.778	445.301	513.337	1206.16	407.13	643.643	-0.65976	0.0896479
ENSMUSG00000027261	Hao1	3658.17	4160.83	3607.34	3558.09	3914.08	3862.34	4184.44	5637.29	3746.11	4399.54	-0.231538	0.089679
ENSMUSG00000028906	Epb41	3380.5	2944.86	2814.58	2908.48	3505.19	2973.58	3486.7	3738.23	3012.1	3425.93	-0.185679	0.0897436
ENSMUSG00000022415	Syngr1	12.1204	19.2098	19.3355	13.1457	9.71456	7.36034	11.9612	8.5543	15.9529	9.39761	0.773111	0.0897485
ENSMUSG00000089817	Gm7162	7.71301	7.6839	4.20338	15.3366	2.64942	5.52026	0	6.11022	8.73422	3.56997	1.299	0.0898111
ENSMUSG00000021453	Gadd45g	184.01	114.298	226.983	193.898	186.343	496.823	150.512	381.278	179.797	303.739	-0.755947	0.090067
ENSMUSG00000070644	Etnk2	8548.22	7455.31	9517.29	8906.18	12571.5	9543.6	9162.31	8990.57	8606.75	10067	-0.226173	0.0901519
ENSMUSG00000041247	Lamp3	3.30558	4.80244	5.04406	5.47736	1.76628	0	2.99031	1.22204	4.65736	1.49466	1.64749	0.0901925
ENSMUSG00000058809	Hspd1-ps3	174.094	223.794	344.677	190.612	373.569	405.739	213.309	251.741	233.294	311.089	-0.413839	0.0902038
ENSMUSG00000023039	Krt7	31.9539	40.3405	42.0338	25.1958	30.0268	20.2409	26.9128	18.3306	34.881	23.8778	0.545573	0.090207
ENSMUSG00000041329	Atp1b2	17.6297	22.0912	10.0881	12.0502	8.83142	11.0405	4.98385	9.77635	15.4648	8.65803	0.833339	0.0902784
ENSMUSG00000054074	Skida1	15.426	16.3283	20.1762	12.0502	30.91	15.6407	37.8773	18.3306	15.9952	25.6897	-0.679275	0.0903929
ENSMUSG00000001763	Tspan33	177.399	141.192	148.8	156.652	171.329	160.087	166.461	312.843	156.011	202.68	-0.3728	0.090422
ENSMUSG00000072849	Serpina1e	770.199	1398.47	1403.93	868.709	1267.31	922.803	1779.24	4340.7	1110.33	2077.51	-0.903538	0.0904758
ENSMUSG00000014418	Hps5	447.355	458.153	420.338	446.952	332.061	389.178	422.631	395.942	443.199	384.953	0.204166	0.090488
ENSMUSG00000032932	Hspa13	544.318	518.663	442.196	571.836	513.105	517.064	655.875	867.651	519.253	638.424	-0.296716	0.0904931
ENSMUSG00000024481	Lvrn	5.50929	2.88146	0	1.09547	0.883142	0	0	0	2.37156	0.220785	2.9537	0.0905011
ENSMUSG00000042396	Rbm7	882.589	978.737	882.71	926.769	1005.02	1028.61	992.783	1075.4	917.701	1025.45	-0.159663	0.090544
ENSMUSG00000022883	Robo1	392.262	337.131	358.128	356.028	290.554	394.698	278.099	179.64	360.887	285.748	0.332697	0.0907307
ENSMUSG00000021466	Ptch1	528.892	528.268	447.24	496.249	460.117	589.747	666.839	645.239	500.162	590.486	-0.238772	0.0907413
ENSMUSG00000038508	Gdf15	1160.26	796.244	485.07	1192.97	833.686	700.152	590.088	647.683	908.635	692.902	0.389585	0.0911605
ENSMUSG00000052520	Cyp2j5	10234.1	11451.9	9138.15	10423.4	10232.1	10644	12238.3	15764.4	10311.9	12219.7	-0.244788	0.0912898
ENSMUSG00000035085	1700020L24Rik	6.61115	7.6839	7.56608	5.47736	2.64942	2.76013	3.98708	2.44409	6.83462	2.96018	1.20961	0.0913193
ENSMUSG00000078688	Mup2	34.1576	56.6688	143.756	53.6781	124.523	82.8038	116.622	204.081	72.065	132.008	-0.867087	0.0914248
ENSMUSG00000107076	Gm43480	1.10186	3.84195	2.52203	3.28641	0.883142	0.920043	0	0	2.68806	0.450796	2.45572	0.091445
ENSMUSG00000031445	Proz	7733.95	7422.65	7323.13	7535.75	7901.47	7908.69	8799.49	8427.21	7503.87	8259.21	-0.138342	0.0914597
ENSMUSG00000105071	Gm43336	3.30558	4.80244	1.68135	4.38189	0	0	2.99031	0	3.54281	0.747578	2.23773	0.0915785
ENSMUSG00000080848	Gm9385	83.7413	124.863	92.4744	95.306	114.808	114.085	133.567	131.981	99.0963	123.61	-0.314381	0.0916139
ENSMUSG00000019478	Rab4a	617.041	675.223	569.978	549.927	542.249	586.987	467.485	485.151	603.042	520.468	0.211173	0.0916937
ENSMUSG00000080972	Gm16061	12.1204	11.5259	13.4508	15.3366	8.83142	7.36034	6.97739	6.11022	13.1084	7.31984	0.828491	0.0916988
ENSMUSG00000087455	5330411J11Rik	2.20372	1.92098	1.68135	2.19094	0.883142	0	0	0	1.99925	0.220785	2.71964	0.0917433
ENSMUSG00000031671	Setd6	374.632	335.21	343.837	369.174	359.439	303.614	281.089	267.627	355.713	302.942	0.227541	0.091746
ENSMUSG00000032279	Idh3a	708.495	756.864	711.212	739.443	653.525	650.47	672.82	630.574	729.004	651.847	0.160884	0.0922994
ENSMUSG00000022766	Serpind1	6902.04	6816.58	5905.75	6915.71	6372.75	7120.21	8643.99	8501.76	6635.02	7659.68	-0.207115	0.0928458
ENSMUSG00000034595	Ppp1r18	245.714	245.885	342.996	227.858	234.916	246.571	198.357	191.861	265.613	217.926	0.286068	0.0928841
ENSMUSG00000037287	Tbcel	1526.07	1623.22	1637.64	1727.56	1644.41	1427.91	1409.43	1215.93	1628.62	1424.42	0.192292	0.0928954
ENSMUSG00000059908	Mug1	32176.5	28878	28498.9	32149.9	30222	29940	37668	46159	30425.8	35997.2	-0.242557	0.092902
ENSMUSG00000009733	Tfcp2	157.566	162.322	174.861	138.029	138.653	149.047	110.642	122.204	158.195	130.136	0.281131	0.0929454
ENSMUSG00000073834	Mup11	128.917	224.754	762.493	204.853	592.588	117.765	419.64	3246.97	330.254	1094.24	-1.72778	0.0929798
ENSMUSG00000104585	4921511C10Rik	4.40743	0	0	4.38189	0	0	0	0	2.19733	0	3.56346	0.0930516
ENSMUSG00000051065	Mb21d2	436.336	372.669	392.596	380.129	428.324	437.94	446.553	503.482	395.432	454.075	-0.198199	0.093249
ENSMUSG00000021728	Emb	40.7688	37.459	52.1219	42.7234	29.1437	41.4019	28.9063	24.4409	43.2683	30.9732	0.477455	0.0932937
ENSMUSG00000050141	Fam205c	0	1.92098	0.840676	0	3.53257	0.920043	3.98708	4.88817	0.690413	3.33197	-2.19004	0.0933515
ENSMUSG00000029663	Gngt1	13.2223	13.4468	4.20338	20.814	9.71456	1.84009	7.97416	4.88817	12.9216	6.10424	1.0601	0.0933939
ENSMUSG00000003053	Cyp2c29	5746.19	8044.08	5548.46	7797.57	7247.94	6602.23	8637.01	10692.9	6784.08	8295.02	-0.289986	0.093469
ENSMUSG00000023017	Asic1	40.7688	45.1429	42.0338	47.1053	65.3525	45.0821	81.7352	45.2156	43.7627	59.3463	-0.444234	0.0935689
ENSMUSG00000057605	Gm6807	46.2781	36.4985	34.4677	33.9596	49.4559	44.162	49.8385	59.8801	37.801	50.8342	-0.425412	0.0936659
ENSMUSG00000031849	Comp	1.10186	0	19.3355	2.19094	2.64942	1.84009	0	0	5.65709	1.12238	2.29524	0.0936731
ENSMUSG00000036983	Tfb1m	125.612	139.271	160.569	97.497	134.238	142.607	178.422	213.858	130.737	167.281	-0.34601	0.0937137
ENSMUSG00000022031	Elp3	489.225	520.584	471.619	556.5	548.431	560.306	572.146	648.905	509.482	582.447	-0.192264	0.0937291
ENSMUSG00000032065	Tex12	15.426	17.2888	20.1762	12.0502	26.4942	11.9606	25.916	42.7715	16.2353	26.7856	-0.698244	0.0937682
ENSMUSG00000035179	Ppp1r32	3.30558	0	0.840676	3.28641	0	0	0	0	1.85817	0	3.32215	0.0937871
ENSMUSG00000040147	Maob	4330.3	5029.11	4547.22	4484.86	5102.79	4644.38	5753.36	5202.24	4597.87	5175.69	-0.17063	0.0940184
ENSMUSG00000104872	1700008B11Rik	9.91673	5.76293	2.52203	5.47736	2.64942	1.84009	2.99031	1.22204	5.91976	2.17547	1.40589	0.0940777
ENSMUSG00000026836	Acvr1	202.742	169.046	212.691	223.476	230.5	232.771	261.154	229.744	201.989	238.542	-0.240839	0.0941336
ENSMUSG00000040462	Os9	5673.47	4404.8	5135.69	5148.72	6157.26	5638.94	5453.33	5728.94	5090.67	5744.62	-0.174513	0.0943517
ENSMUSG00000025075	Habp2	3261.5	3110.06	2810.38	3353.24	3465.45	3265.23	3607.31	3682.02	3133.79	3505	-0.161653	0.0947075
ENSMUSG00000027750	Postn	365.817	387.077	371.579	370.269	226.967	363.417	357.841	295.734	373.685	310.99	0.265446	0.0947702
ENSMUSG00000033533	Acsm1	5065.24	5635.18	5709.87	6129.16	6650.94	5549.7	6451.1	6836.11	5634.87	6371.96	-0.177221	0.094827
ENSMUSG00000039099	Wdr93	65.0097	70.1156	71.4575	85.4468	58.2873	69.0032	53.8256	41.5495	73.0074	55.6664	0.380611	0.0948593
ENSMUSG00000020964	Sel1l	2218.04	2129.4	1735.16	2096.73	1960.57	2300.11	2339.42	3112.54	2044.83	2428.16	-0.247533	0.0948978
ENSMUSG00000105837	Gm35986	66.1115	93.1673	83.2269	76.683	77.7165	64.403	43.8579	57.436	79.7972	60.8533	0.388737	0.0949727
ENSMUSG00000049988	Lrrc25	126.714	198.821	207.647	141.316	137.77	151.807	146.525	79.4328	168.624	128.884	0.385709	0.094994
ENSMUSG00000037022	Mmaa	506.855	555.162	476.663	452.43	575.808	574.107	502.372	651.349	497.777	575.909	-0.208908	0.0951148
ENSMUSG00000094626	Tmem121b	0	0.960488	0	1.09547	2.64942	2.76013	3.98708	1.22204	0.51399	2.65467	-2.41715	0.0952079
ENSMUSG00000114733	AC131187.2	1.10186	1.92098	0.840676	4.38189	0	0	0	1.22204	2.06135	0.305511	2.75342	0.0953119
ENSMUSG00000033436	Armcx2	60.6022	64.3527	82.3863	59.1555	60.9368	57.9627	44.8547	35.4393	66.6242	49.7983	0.41378	0.0953156
ENSMUSG00000044017	Adgrd1	23.139	38.4195	42.8745	27.3868	30.0268	23.0011	15.9483	19.5527	32.955	22.1322	0.575409	0.0953232
ENSMUSG00000025786	Zdhhc3	526.688	545.557	532.989	511.585	655.291	663.351	516.327	591.469	529.205	606.609	-0.197618	0.0953508
ENSMUSG00000079427	Mthfsl	397.771	515.782	433.789	375.747	491.91	483.022	464.495	591.469	430.772	507.724	-0.234209	0.0954567
ENSMUSG00000013698	Pea15a	686.458	786.639	741.476	763.544	702.981	716.713	615.007	554.808	744.529	647.377	0.199987	0.0954585
ENSMUSG00000026249	Serpine2	95.8617	65.3132	85.749	89.8287	88.3142	70.8433	106.654	212.636	84.1881	119.612	-0.499555	0.0954843
ENSMUSG00000111250	AC159886.2	7.71301	0.960488	1.68135	7.6683	0.883142	1.84009	1.99354	0	4.50579	1.17919	1.8676	0.0954882
ENSMUSG00000079494	Nat8f5	88.1487	145.994	137.871	112.834	161.615	109.485	223.277	142.979	121.212	159.339	-0.391019	0.0955127
ENSMUSG00000027327	1700037H04Rik	273.261	293.909	345.518	333.023	287.904	318.335	221.283	173.53	311.428	250.263	0.311729	0.0955282
ENSMUSG00000032079	Apoa5	26613.2	19594.9	27194.2	25061.1	30750.1	28088	27636.5	26715.1	24615.8	28297.4	-0.201104	0.0955363
ENSMUSG00000081210	Gm12933	2.20372	0	0.840676	4.38189	0	0	0	0	1.85657	0	3.3214	0.0957631
ENSMUSG00000059481	Plg	34544.4	34392.2	32372.8	34178.7	35890	37046.4	35053.4	44499.5	33872	38122.3	-0.170509	0.0958899
ENSMUSG00000113853	CT009757.5	5.50929	3.84195	1.68135	2.19094	0	0.920043	1.99354	0	3.30588	0.728396	2.14922	0.0959799
ENSMUSG00000076652	Ighv7-3	3.30558	1.92098	1.68135	1.09547	0.883142	0	0	0	2.00084	0.220785	2.72062	0.0959853
ENSMUSG00000021974	Fgf9	4.40743	14.4073	11.7695	17.5275	2.64942	11.9606	5.98062	0	12.0279	5.14765	1.1944	0.0960925
ENSMUSG00000074269	Rec114	12.1204	48.0244	10.9288	15.3366	52.1054	22.081	26.9128	48.8817	21.6026	37.4952	-0.7902	0.0961212
ENSMUSG00000023032	Slc4a8	17.6297	23.0517	15.9728	8.76377	20.3123	22.081	30.8999	29.329	16.3545	25.6556	-0.635519	0.0961354
ENSMUSG00000057069	Ero1lb	734.94	736.694	547.28	606.891	589.939	663.351	819.345	1292.92	656.451	841.389	-0.356755	0.0963883
ENSMUSG00000022818	Cyp2ab1	2.20372	5.76293	0.840676	2.19094	0.883142	0	0.99677	0	2.74957	0.469978	2.46585	0.0964277
ENSMUSG00000109005	Gm45221	16.5279	5.76293	3.3627	10.9547	4.41571	1.84009	4.98385	4.88817	9.15206	4.03195	1.1736	0.0964381
ENSMUSG00000029191	Rfc1	468.29	496.572	506.087	483.103	427.441	407.579	462.501	430.159	488.513	431.92	0.178772	0.0965752
ENSMUSG00000025352	Gdf11	15.426	4.80244	3.3627	6.57283	5.29885	3.68017	1.99354	0	7.541	2.74314	1.38688	0.09658
ENSMUSG00000083524	Mup-ps21	1.10186	1.92098	4.20338	8.76377	8.83142	5.52026	0	68.4344	3.9975	20.6965	-2.36846	0.0968711
ENSMUSG00000046062	Ppp1r15b	1904.01	1863.35	1825.95	1711.13	1878.44	1956.01	2083.25	2280.33	1826.11	2049.51	-0.165752	0.0969721
ENSMUSG00000086432	B430119L08Rik	113.491	99.8907	138.712	143.507	101.561	143.527	157.49	268.85	123.9	167.857	-0.43141	0.0970854
ENSMUSG00000107118	Gm42986	7.71301	6.72341	6.72541	9.85924	1.76628	2.76013	5.98062	3.66613	7.75527	3.54329	1.14022	0.0971376
ENSMUSG00000043635	Adamts3	8.81487	4.80244	10.9288	7.6683	1.76628	5.52026	5.98062	0	8.0536	3.31679	1.25014	0.0972141
ENSMUSG00000025537	Phkg1	16.5279	3.84195	4.20338	6.57283	4.41571	2.76013	3.98708	1.22204	7.78651	3.09624	1.28355	0.0975405
ENSMUSG00000099309	Mir7085	2.20372	0	0	0	0.883142	1.84009	2.99031	6.11022	0.550929	2.95594	-2.51343	0.0975727
ENSMUSG00000036528	Ppfibp2	567.457	563.806	541.395	548.831	557.262	502.343	453.53	409.384	555.373	480.63	0.205603	0.0975956
ENSMUSG00000031808	Slc27a1	890.302	717.484	802.005	817.222	971.456	848.279	1021.69	848.098	806.753	922.381	-0.194334	0.0976005
ENSMUSG00000025889	Snca	33.0558	28.8146	29.4237	46.0098	37.9751	48.7623	64.7901	39.1054	34.326	47.6582	-0.482197	0.0976569
ENSMUSG00000014905	Dnajb9	916.746	966.251	767.537	897.191	779.814	1052.53	919.022	1771.96	886.931	1130.83	-0.349448	0.0977795
ENSMUSG00000020974	Pole2	9.91673	15.3678	10.9288	8.76377	7.06513	4.60021	8.97093	2.44409	11.2443	5.77009	0.945358	0.0978421
ENSMUSG00000109555	Gm44891	1.10186	0	0.840676	7.6683	0	0	0	1.22204	2.40271	0.305511	2.96992	0.0978648
ENSMUSG00000040451	Sgms1	473.799	444.706	364.853	496.249	360.322	357.897	411.666	394.72	444.902	381.151	0.221925	0.0979584
ENSMUSG00000051579	Tceal8	696.375	867.32	676.744	779.976	608.485	770.076	647.901	546.253	755.104	643.179	0.230027	0.0980292
ENSMUSG00000022186	Oxct1	78.232	127.745	135.349	127.075	97.1456	102.125	91.7029	76.9887	117.1	91.9905	0.347748	0.0981175
ENSMUSG00000102881	Gm3807	29.7502	19.2098	21.8576	29.5777	15.8965	10.1205	25.916	10.9984	25.0988	15.7329	0.662277	0.0982225
ENSMUSG00000067818	Myl9	144.343	93.1673	82.3863	77.7785	181.044	126.046	116.622	100.208	99.4189	130.98	-0.40565	0.0982797
ENSMUSG00000028986	Klhl7	350.391	451.429	294.237	319.878	248.163	292.574	290.06	342.172	353.984	293.242	0.273863	0.0983802
ENSMUSG00000081885	Gm13231	1.10186	1.92098	2.52203	2.19094	0	0	0	1.22204	1.93395	0.305511	2.68491	0.0986294
ENSMUSG00000036764	Dnajc12	201.64	201.702	204.284	207.044	244.63	232.771	188.39	331.174	203.668	249.241	-0.28734	0.0987992
ENSMUSG00000085016	Gm11335	0	0	0	1.09547	2.64942	1.84009	1.99354	1.22204	0.273868	1.92627	-2.68848	0.0991548
ENSMUSG00000087652	Gm15918	7.71301	1.92098	1.68135	2.19094	0.883142	0	1.99354	0	3.37657	0.719171	2.18095	0.0993525
ENSMUSG00000100337	Gm5066	0	0.960488	0	0	1.76628	2.76013	1.99354	1.22204	0.240122	1.9355	-2.69355	0.0994529
ENSMUSG00000040118	Cacna2d1	31.9539	29.7751	35.3084	29.5777	20.3123	21.161	16.9451	30.5511	31.6538	22.2424	0.526107	0.0994545
ENSMUSG00000086773	Gm16192	4.40743	0	3.3627	4.38189	0	1.84009	0	0	3.03801	0.460021	2.61372	0.0994614
ENSMUSG00000097772	5430416N02Rik	15.426	20.1702	18.4949	29.5777	18.546	30.3614	48.8417	30.5511	20.9172	32.0751	-0.616914	0.0995133
ENSMUSG00000048279	Sacs	17.6297	13.4468	31.105	20.814	23.8448	24.8412	51.8321	29.329	20.7489	32.4618	-0.633725	0.0995716
ENSMUSG00000041671	Pyroxd1	82.6394	72.9971	81.5456	119.406	98.9119	92.0043	128.583	139.313	89.1471	114.703	-0.362094	0.0996309
ENSMUSG00000001518	Itfg2	232.492	227.636	199.24	215.808	269.358	221.73	249.193	288.402	218.794	257.171	-0.23234	0.0997179
ENSMUSG00000029659	Medag	13.2223	12.4863	18.4949	6.57283	8.83142	7.36034	7.97416	2.44409	12.6941	6.6525	0.916483	0.0999677
ENSMUSG00000105842	Gm43329	1.10186	0	0	0	0.883142	0	9.9677	0	0.275465	2.71271	-3.17337	0.100054
ENSMUSG00000056962	Jmjd6	531.096	431.259	431.267	507.203	531.651	577.787	456.521	684.344	475.206	562.576	-0.243212	0.100218
ENSMUSG00000067038	Rps12-ps3	767.996	885.57	654.887	558.69	523.703	550.186	624.975	695.343	716.786	598.552	0.261648	0.100233
ENSMUSG00000114349	AC140462.1	41.8706	37.459	42.8745	32.8641	60.0536	56.1226	44.8547	45.2156	38.7671	51.5616	-0.414457	0.10027
ENSMUSG00000020807	4933427D14Rik	89.2506	70.1156	60.5287	75.5875	53.8716	65.323	47.845	61.1022	73.8706	57.0355	0.368589	0.10035
ENSMUSG00000087734	Gm24646	1.10186	1.92098	2.52203	2.19094	0	0	0.99677	0	1.93395	0.249193	2.68479	0.100362
ENSMUSG00000093387	Gm20732	3.30558	5.76293	4.20338	3.28641	0	0.920043	2.99031	1.22204	4.13957	1.2831	1.72543	0.100439
ENSMUSG00000016386	Mpped2	7.71301	11.5259	4.20338	8.76377	15.8965	11.9606	15.9483	12.2204	8.0515	14.0065	-0.814411	0.100523
ENSMUSG00000022148	Fyb	252.326	267.016	251.362	173.085	141.303	205.17	238.228	171.086	235.947	188.947	0.322002	0.100557
ENSMUSG00000094983	Gm23726	0	0.960488	0	2.19094	2.64942	0	2.99031	9.77635	0.787858	3.85402	-2.30452	0.100637
ENSMUSG00000048186	Bend7	113.491	110.456	121.898	133.648	113.925	158.247	147.522	168.642	119.873	147.084	-0.291368	0.101001
ENSMUSG00000061175	Fnip2	697.477	716.524	756.608	656.187	695.032	683.592	556.198	459.488	706.699	598.578	0.237675	0.101304
ENSMUSG00000075268	Gm10819	79.3338	105.654	125.261	104.07	130.705	188.609	117.619	98.9855	103.58	133.98	-0.37204	0.10144
ENSMUSG00000074491	Clec4g	1382.83	1376.38	1435.87	1426.3	1677.97	1437.11	1505.12	1639.98	1405.35	1565.05	-0.154959	0.101541
ENSMUSG00000106475	Gm43011	1.10186	4.80244	2.52203	4.38189	1.76628	0	0.99677	0	3.20205	0.690763	2.14594	0.10158
ENSMUSG00000036504	Phpt1	5.50929	7.6839	7.56608	2.19094	6.18199	9.20043	15.9483	14.6645	5.73756	11.4988	-0.968247	0.101714
ENSMUSG00000014846	Tppp3	36.3613	30.7356	29.4237	14.2411	21.1954	19.3209	18.9386	12.2204	27.6904	17.9188	0.618125	0.101755
ENSMUSG00000031928	Mre11a	116.797	152.718	108.447	136.934	124.523	100.285	81.7352	105.096	128.724	102.91	0.320026	0.101781
ENSMUSG00000007989	Fzd3	7.71301	3.84195	3.3627	6.57283	0.883142	2.76013	1.99354	2.44409	5.37262	2.02022	1.41118	0.10192
ENSMUSG00000030805	Stx4a	772.403	800.086	815.456	859.945	758.619	678.991	633.946	791.884	811.973	715.86	0.182587	0.102012
ENSMUSG00000017453	Pipox	4453.71	4752.49	5331.57	4756.54	5762.5	5052.87	5663.65	5105.7	4823.58	5396.18	-0.16174	0.1021
ENSMUSG00000101995	Gm29480	3.30558	6.72341	3.3627	7.6683	2.64942	1.84009	1.99354	1.22204	5.265	1.92627	1.42018	0.102125
ENSMUSG00000099632	2900093K20Rik	37.4632	30.7356	13.4508	18.623	12.364	20.2409	14.9516	14.6645	25.0682	15.5552	0.678193	0.10261
ENSMUSG00000109652	Gm45555	2.20372	4.80244	0.840676	3.28641	0	1.84009	0	0	2.78331	0.460021	2.48698	0.1028
ENSMUSG00000035171	1110059E24Rik	306.317	422.615	354.765	318.782	353.257	377.217	435.589	521.812	350.62	421.969	-0.263216	0.102874
ENSMUSG00000014601	Strip1	385.651	291.988	358.969	370.269	340.893	313.735	276.105	260.295	351.719	297.757	0.236507	0.102901
ENSMUSG00000021033	Gstz1	11825.1	14245	15363.4	13787.6	15628.1	14281.8	16036	16358.3	13805.3	15576.1	-0.173992	0.102936
ENSMUSG00000090230	Gm16315	9.91673	2.88146	4.20338	2.19094	0	1.84009	2.99031	1.22204	4.79813	1.51311	1.66877	0.102943
ENSMUSG00000050064	Zfp697	45.1762	49.9454	47.0779	59.1555	63.5862	55.2026	72.7642	68.4344	50.3387	64.9969	-0.368092	0.103232
ENSMUSG00000083708	Gm13123	9.91673	3.84195	26.9016	6.57283	49.4559	17.4808	3.98708	29.329	11.8083	25.0632	-1.07114	0.103537
ENSMUSG00000038930	Rccd1	84.8431	66.2737	61.3694	66.8238	58.2873	34.9616	67.7804	48.8817	69.8275	52.4778	0.408436	0.103604
ENSMUSG00000087719	Gm26464	1.10186	0.960488	1.68135	0	3.53257	1.84009	1.99354	7.33226	0.935925	3.67461	-1.89919	0.103674
ENSMUSG00000039556	Ppp1r3f	26.4446	20.1702	12.6101	16.4321	7.94827	8.28038	18.9386	9.77635	18.9143	11.2359	0.74724	0.103731
ENSMUSG00000031434	Morc4	197.233	170.967	131.986	141.316	137.77	172.968	84.7255	94.0973	160.375	122.39	0.383078	0.103781
ENSMUSG00000023873	1700010I14Rik	7.71301	15.3678	11.7695	13.1457	6.18199	8.28038	6.97739	4.88817	11.999	6.58199	0.858954	0.103872
ENSMUSG00000020288	Ahsa2	331.659	341.934	235.389	282.632	312.632	319.255	347.873	475.375	297.904	363.784	-0.286487	0.103892
ENSMUSG00000032827	Ppp1r9a	242.409	170.967	174.861	223.476	219.902	173.888	287.07	358.059	202.928	259.73	-0.354349	0.103906
ENSMUSG00000031574	Star	48.4818	39.38	35.3084	50.3917	26.4942	33.1215	41.8644	21.9968	43.3905	30.8692	0.478213	0.103917
ENSMUSG00000106194	Gm43569	0	0	0	2.19094	0	0.920043	4.98385	7.33226	0.547736	3.30904	-2.66967	0.104045
ENSMUSG00000091803	Cox16	242.409	308.317	297.599	255.245	323.23	331.215	281.089	361.725	275.892	324.315	-0.229417	0.104146
ENSMUSG00000074419	Gm15448	8.81487	9.60488	5.88473	2.19094	1.76628	3.68017	1.99354	3.66613	6.62386	2.77653	1.27324	0.10425
ENSMUSG00000088475	Gm23084	1.10186	0	0.840676	0	0.883142	1.84009	2.99031	4.88817	0.485634	2.65043	-2.40349	0.104318
ENSMUSG00000019577	Pdk4	399.975	347.697	152.162	260.722	151.017	216.21	201.348	293.29	290.139	215.466	0.430287	0.104429
ENSMUSG00000027832	Ptx3	0	0.960488	0	0	0.883142	3.68017	3.98708	0	0.240122	2.1376	-2.8421	0.104493
ENSMUSG00000105929	Gm43693	3.30558	0.960488	1.68135	5.47736	0	0	0	2.44409	2.85619	0.611022	2.46633	0.104574
ENSMUSG00000110754	4930405J17Rik	4.40743	3.84195	0	0	0	0	0	0	2.06235	0	3.48357	0.104764
ENSMUSG00000079243	Xirp1	5.50929	7.6839	7.56608	5.47736	5.29885	8.28038	15.9483	21.9968	6.55916	12.8811	-0.939156	0.10484
ENSMUSG00000051098	Mblac2	71.6208	120.061	102.562	86.5423	125.406	101.205	130.577	122.204	95.1966	119.848	-0.326037	0.104916
ENSMUSG00000030717	Nupr1	66.1115	97.9697	57.166	71.2057	49.4559	64.403	54.8224	54.9919	73.1132	55.9183	0.385591	0.104971
ENSMUSG00000073538	E330020D12Rik	2.20372	0.960488	2.52203	1.09547	2.64942	5.52026	4.98385	6.11022	1.69543	4.81594	-1.47904	0.105111
ENSMUSG00000097494	4933406C10Rik	3.30558	4.80244	0.840676	13.1457	0.883142	0	4.98385	0	5.52359	1.46675	1.88607	0.105252
ENSMUSG00000043165	Lor	35.2595	45.1429	66.4134	56.9645	45.9234	42.322	28.9063	29.329	50.9451	36.6202	0.472604	0.105344
ENSMUSG00000018983	E2f2	42.9725	35.538	49.5999	35.0551	31.7931	33.1215	34.887	10.9984	40.7914	27.7	0.543734	0.105456
ENSMUSG00000042743	Sgtb	89.2506	72.9971	79.0236	76.683	57.4042	77.2836	63.7933	50.1038	79.4885	62.1462	0.347318	0.105524
ENSMUSG00000058022	Adtrp	2350.26	2455.97	2196.69	2439.62	2367.7	2324.03	2857.74	3481.6	2360.63	2757.77	-0.223808	0.105555
ENSMUSG00000023089	Ndufa5	1550.32	1704.87	1529.19	1368.24	2025.93	1601.79	1624.74	1767.07	1538.15	1754.88	-0.190091	0.105881
ENSMUSG00000081679	Gm11874	1.10186	0	4.20338	3.28641	0	0	0.99677	0	2.14791	0.249193	2.83687	0.105883
ENSMUSG00000075324	Fign	130.019	125.824	137.03	81.0649	90.0804	113.165	102.667	48.8817	118.485	88.6987	0.41248	0.106044
ENSMUSG00000005251	Ripk4	176.297	143.113	160.569	177.466	219.902	167.448	209.322	185.751	164.361	195.606	-0.254327	0.106046
ENSMUSG00000026728	Vim	896.913	1089.19	1477.91	896.096	929.065	1027.69	886.129	761.333	1090.03	901.054	0.275073	0.106072
ENSMUSG00000029275	Gfi1	1.10186	0.960488	1.68135	1.09547	4.41571	2.76013	9.9677	0	1.20979	4.28588	-1.82682	0.106121
ENSMUSG00000031557	Plekha2	121.204	79.7205	123.579	109.547	77.7165	90.1642	107.651	61.1022	108.513	84.1585	0.361904	0.106255
ENSMUSG00000040412	5330417C22Rik	55.0929	50.9058	59.688	50.3917	23.8448	59.8028	44.8547	21.9968	54.0196	37.6248	0.51458	0.10631
ENSMUSG00000112902	AC153821.2	7.71301	4.80244	1.68135	4.38189	8.83142	2.76013	18.9386	9.77635	4.64467	10.0766	-1.13649	0.106336
ENSMUSG00000087334	AW495222	2.20372	1.92098	2.52203	4.38189	3.53257	12.8806	7.97416	2.44409	2.75715	6.70785	-1.30887	0.106458
ENSMUSG00000024924	Vldlr	295.298	283.344	238.752	314.4	244.63	272.333	246.202	174.752	282.949	234.479	0.264813	0.10691
ENSMUSG00000047446	Arl4a	648.995	694.433	527.104	554.309	558.146	721.313	696.742	942.195	606.21	729.599	-0.265845	0.107053
ENSMUSG00000022203	Efs	12.1204	12.4863	15.1322	20.814	11.4808	8.28038	10.9645	3.66613	15.1382	8.59796	0.788714	0.107215
ENSMUSG00000015957	Wnt11	1.10186	2.88146	2.52203	1.09547	4.41571	7.36034	4.98385	3.66613	1.90021	5.10651	-1.40353	0.10733
ENSMUSG00000033083	Tbc1d4	98.0654	97.0093	120.217	86.5423	78.5996	77.2836	101.671	58.6581	100.458	79.053	0.344358	0.107337
ENSMUSG00000062410	Hsd3b3	1958	2171.66	2903.7	2638.99	2910.83	2565.08	3279.37	2604.17	2418.09	2839.87	-0.231756	0.107349
ENSMUSG00000069324	Gm5096	14265.8	15722.2	11895.6	11093.8	12762.3	16306.8	15079.1	18054.5	13244.3	15550.7	-0.231541	0.107362
ENSMUSG00000021336	Slc17a4	834.107	1023.88	811.252	1115.19	669.421	891.521	782.465	877.427	946.107	805.209	0.232859	0.107401
ENSMUSG00000037827	Gm5884	174.094	173.848	211.85	222.381	278.19	245.651	202.344	210.191	195.543	234.094	-0.262014	0.107429
ENSMUSG00000015452	Ager	5.50929	4.80244	9.24744	9.85924	6.18199	3.68017	1.99354	0	7.3546	2.96393	1.25364	0.107468
ENSMUSG00000006585	Cdt1	66.1115	60.5107	85.749	83.2558	79.4827	57.9627	47.845	24.4409	73.9068	52.4328	0.482296	0.107593
ENSMUSG00000109293	Dcst2	12.1204	14.4073	15.1322	28.4823	9.71456	11.0405	7.97416	13.4425	17.5355	10.5429	0.73723	0.107685
ENSMUSG00000089670	Gm16581	5.50929	1.92098	2.52203	1.09547	0	0	1.99354	0	2.76194	0.498385	2.44053	0.108012
ENSMUSG00000049493	Pls1	61.7041	56.6688	56.3253	81.0649	36.2088	77.2836	40.8676	19.5527	63.9408	43.4782	0.542409	0.108092
ENSMUSG00000073676	Hspe1	2962.9	3611.43	2902.01	2802.22	3376.25	3273.51	3296.32	4158.61	3069.64	3526.17	-0.199605	0.108209
ENSMUSG00000024665	Fads2	12909.4	10647	12257.1	16223.9	16127	16276.5	14892.7	13304.4	13009.3	15150.2	-0.219899	0.10837
ENSMUSG00000098286	Mir8091	1.10186	0	1.68135	1.09547	2.64942	0.920043	3.98708	7.33226	0.969671	3.7222	-1.89627	0.108627
ENSMUSG00000069170	Adgrv1	274.363	231.478	399.321	365.888	309.983	189.529	190.383	306.733	317.762	249.157	0.352915	0.108816
ENSMUSG00000070368	Prok1	26.4446	14.4073	36.1491	31.7687	54.7548	9.20043	65.7868	52.5479	27.1924	45.5725	-0.740673	0.108899
ENSMUSG00000113003	AC125409.1	2.20372	0	2.52203	7.6683	0	0	1.99354	0	3.09851	0.498385	2.59639	0.108928
ENSMUSG00000020218	Wif1	2.20372	4.80244	5.04406	1.09547	7.94827	0.920043	3.98708	23.2188	3.28642	9.01856	-1.40317	0.109047
ENSMUSG00000001672	Marveld3	25.3428	11.5259	18.4949	13.1457	9.71456	35.8817	23.9225	45.2156	17.1273	28.6836	-0.73427	0.10912
ENSMUSG00000113432	AC154828.2	3.30558	0.960488	4.20338	0	0.883142	0	0	0	2.11736	0.220785	2.82083	0.10929
ENSMUSG00000024579	Pcyox1l	31.9539	15.3678	23.5389	23.0049	30.0268	37.7217	44.8547	23.2188	23.4664	33.9555	-0.545453	0.109328
ENSMUSG00000110715	Gm5131	1.10186	3.84195	4.20338	3.28641	7.06513	12.8806	0.99677	9.77635	3.1084	7.67971	-1.28325	0.109377
ENSMUSG00000104882	Gm43096	13.2223	4.80244	7.56608	8.76377	2.64942	8.28038	2.99031	1.22204	8.58865	3.78554	1.14002	0.109455
ENSMUSG00000026357	Rgs18	4.40743	3.84195	1.68135	1.09547	6.18199	6.4403	7.97416	4.88817	2.75655	6.37116	-1.22523	0.109544
ENSMUSG00000028369	Svep1	62.8059	48.0244	71.4575	26.2913	45.0402	38.6418	36.8805	24.4409	52.1448	36.2508	0.520822	0.109712
ENSMUSG00000107726	Gm44037	2.20372	1.92098	0.840676	1.09547	0	0	0	0	1.51521	0	3.03888	0.10977
ENSMUSG00000115686	AC154528.2	2.20372	1.92098	0.840676	1.09547	0	0	0	0	1.51521	0	3.03888	0.10977
ENSMUSG00000026566	Mpzl1	76.0283	91.2463	70.6168	75.5875	53.8716	67.1631	53.8256	73.3226	78.3697	62.0457	0.342572	0.10979
ENSMUSG00000095545	Zfp969	8.81487	21.1307	1.68135	6.57283	5.29885	18.4009	36.8805	18.3306	9.54995	19.7277	-1.04756	0.109818
ENSMUSG00000084230	Gm14388	33.0558	28.8146	31.9457	25.1958	37.0919	33.1215	46.8482	46.4376	29.753	40.8748	-0.44923	0.109909
ENSMUSG00000038980	Rbbp8nl	1.10186	1.92098	0.840676	2.19094	0	0	0	0	1.51361	0	3.03777	0.109962
ENSMUSG00000023987	Pgc	1.10186	1.92098	0.840676	2.19094	0	0	0	0	1.51361	0	3.03777	0.109962
ENSMUSG00000021484	Lman2	5463.02	5429.64	5130.65	5433.54	5851.7	5913.11	5517.12	6238.53	5364.21	5880.12	-0.132449	0.109981
ENSMUSG00000020733	Slc9a3r1	5333	5480.54	8376.5	6112.73	9473.46	6901.24	7161.79	6792.12	6325.69	7582.15	-0.261322	0.110094
ENSMUSG00000070692	Rps12-ps10	1.10186	0.960488	3.3627	2.19094	0	0.920043	0	0	1.904	0.230011	2.6671	0.110418
ENSMUSG00000037949	Ano10	291.993	325.605	242.955	290.3	229.617	291.654	232.247	216.302	287.713	242.455	0.243471	0.110471
ENSMUSG00000103585	Pcdhgb4	6.61115	2.88146	2.52203	4.38189	7.94827	11.0405	12.958	2.44409	4.09913	8.59772	-1.11003	0.110646
ENSMUSG00000081372	Gm16171	1.10186	0.960488	0.840676	3.28641	0	0	0	0	1.54736	0	3.06246	0.110669
ENSMUSG00000039182	AW209491	249.02	257.411	236.23	242.099	264.942	319.255	230.254	361.725	246.19	294.044	-0.253697	0.110833
ENSMUSG00000110459	Gm31717	3.30558	6.72341	3.3627	4.38189	3.53257	9.20043	8.97093	15.8866	4.4434	9.39762	-1.05588	0.110929
ENSMUSG00000074768	Bhmt	101457	114249	82938.6	76926.2	92139.1	115747	105693	129330	93892.7	110727	-0.237916	0.11105
ENSMUSG00000023927	Satb1	15.426	22.0912	26.9016	17.5275	7.94827	9.20043	18.9386	15.8866	20.4866	12.9935	0.683907	0.111098
ENSMUSG00000029591	Ung	179.603	214.189	205.966	185.135	231.383	230.931	184.403	304.289	196.223	237.751	-0.271633	0.111177
ENSMUSG00000025375	Aatk	303.011	329.447	554.006	549.927	627.914	454.501	536.262	554.808	434.098	543.371	-0.32309	0.111304
ENSMUSG00000042680	Garem1	848.431	645.448	769.219	718.629	737.423	1058.97	832.303	852.986	745.432	870.42	-0.223989	0.111371
ENSMUSG00000108528	Gm8319	3.30558	7.6839	5.88473	6.57283	3.53257	2.76013	1.99354	1.22204	5.86176	2.37707	1.27399	0.111377
ENSMUSG00000049872	Fam26e	22.0372	13.4468	19.3355	13.1457	14.1303	9.20043	11.9612	4.88817	16.9913	10.045	0.73608	0.111396
ENSMUSG00000023992	Trem2	252.326	168.085	305.165	210.331	204.006	234.611	156.493	142.979	233.977	184.522	0.340365	0.111547
ENSMUSG00000096986	4930509E16Rik	3.30558	1.92098	2.52203	5.47736	13.2471	11.9606	2.99031	2.44409	3.30648	7.66052	-1.25582	0.111599
ENSMUSG00000068246	Apol9b	2199.31	2439.64	2876.79	2397.99	3572.31	2597.28	2507.87	2868.14	2478.43	2886.4	-0.219671	0.111675
ENSMUSG00000079012	Serpina3m	6712.52	7905.77	5522.4	6040.43	6353.32	7063.17	7356.16	10865.2	6545.28	7909.46	-0.272962	0.111687
ENSMUSG00000081988	Gm15746	51.7874	43.2219	53.8033	31.7687	45.0402	46.0021	74.7578	84.321	45.1453	62.5303	-0.455955	0.111784
ENSMUSG00000020048	Hsp90b1	8277.16	8417.71	6018.4	7648.58	6486.68	7483.63	9754.39	14657.2	7590.46	9595.47	-0.338059	0.11185
ENSMUSG00000047797	Gjb1	11036.2	10251.3	12047.7	12658.2	13354	12843.8	12121.7	12907.2	11498.4	12806.7	-0.155487	0.111856
ENSMUSG00000040329	Il7	13.2223	5.76293	12.6101	5.47736	5.29885	3.68017	1.99354	7.33226	9.26818	4.57621	1.043	0.111891
ENSMUSG00000034457	Eda2r	121.204	75.8785	62.21	82.1604	50.3391	76.3635	46.8482	80.6549	85.3633	63.5514	0.425482	0.111899
ENSMUSG00000022245	Skor1	2.20372	0	7.56608	0	0	0.920043	0	0	2.44245	0.230011	3.03507	0.111984
ENSMUSG00000047965	Rpl9-ps7	114.593	143.113	158.047	113.929	100.678	108.565	130.577	89.2092	132.421	107.257	0.306128	0.112012
ENSMUSG00000089940	Gm4117	7.71301	2.88146	3.3627	9.85924	4.41571	0.920043	2.99031	0	5.95411	2.08152	1.4479	0.112179
ENSMUSG00000033006	Sox10	0	0	0	0	1.76628	2.76013	1.99354	0	0	1.62999	-3.17611	0.112247
ENSMUSG00000107894	Gm10388	5.50929	1.92098	0.840676	2.19094	0.883142	0	0.99677	0	2.61547	0.469978	2.37489	0.112289
ENSMUSG00000030946	Lhpp	2940.86	2792.14	3415.67	3386.1	4492.54	3348.96	3421.91	3234.75	3133.69	3624.54	-0.210145	0.112456
ENSMUSG00000106035	Gm43545	3.30558	5.76293	1.68135	4.38189	0	0	1.99354	2.44409	3.78294	1.10941	1.85761	0.112503
ENSMUSG00000059237	Ppp1r2-ps4	3.30558	4.80244	8.40676	1.09547	3.53257	7.36034	11.9612	17.1086	4.40256	9.99069	-1.12395	0.112572
ENSMUSG00000093894	Ighv1-53	4.40743	0	0.840676	3.28641	0	0	0	1.22204	2.13363	0.305511	2.79527	0.112627
ENSMUSG00000074643	Cpne1	2.20372	0	0	1.09547	5.29885	0.920043	5.98062	1.22204	0.824797	3.35539	-2.12416	0.112664
ENSMUSG00000108090	Gm6637	0	0	0	0	0.883142	1.84009	1.99354	1.22204	0	1.4847	-3.02291	0.112742
ENSMUSG00000067653	Ankrd23	12.1204	6.72341	2.52203	8.76377	4.41571	1.84009	1.99354	4.88817	7.53242	3.28438	1.19361	0.113246
ENSMUSG00000044627	Swi5	1562.44	1719.27	1820.9	1489.84	1975.59	1876.89	1707.47	1840.4	1648.11	1850.08	-0.166284	0.113413
ENSMUSG00000025726	Slc28a1	25.3428	31.6961	32.7864	53.6781	23.8448	23.0011	30.8999	21.9968	35.8758	24.9356	0.519323	0.113425
ENSMUSG00000073988	Ttpa	10452.2	12526.7	9876.26	9750.79	10667.5	11928.4	11968.2	14315	10651.5	12219.8	-0.198041	0.113522
ENSMUSG00000031776	Arl2bp	119.001	177.69	113.491	120.502	110.393	106.725	105.658	107.54	132.671	107.579	0.302898	0.113534
ENSMUSG00000030789	Itgax	116.797	111.417	237.071	127.075	107.743	117.765	134.564	90.4312	148.09	112.626	0.39775	0.113539
ENSMUSG00000067870	Rpl31-ps8	641.282	602.226	707.009	559.786	647.343	808.718	715.681	700.231	627.576	717.993	-0.193249	0.113807
ENSMUSG00000004558	Ndrg2	26384	29400.5	35260.5	27541.3	39733.4	29191.1	33608.1	34104.8	29646.6	34159.4	-0.204385	0.113963
ENSMUSG00000006205	Htra1	99.1673	75.8785	94.9964	53.6781	72.4176	73.6034	55.8191	39.1054	80.9301	60.2364	0.418527	0.114256
ENSMUSG00000042195	Slc35f2	123.408	119.1	90.793	111.738	62.7031	126.046	83.7287	69.6565	111.26	85.5335	0.373482	0.114412
ENSMUSG00000078653	Cntd1	1.10186	0	0	1.09547	1.76628	1.84009	3.98708	2.44409	0.549333	2.50938	-2.30609	0.114452
ENSMUSG00000086040	Wipf3	512.364	392.839	541.395	650.71	422.142	553.866	407.679	323.841	524.327	426.882	0.294217	0.114468
ENSMUSG00000052688	Rab7b	58.3985	49.9454	76.5015	66.8238	41.5077	63.4829	47.845	36.6613	62.9173	47.3742	0.405223	0.114478
ENSMUSG00000017718	Afmid	572.967	534.992	949.123	601.414	926.416	740.634	928.99	672.124	664.624	817.041	-0.29716	0.11448
ENSMUSG00000041498	Kif14	5.50929	0	3.3627	4.38189	1.76628	0.920043	0	0	3.31347	0.671581	2.20522	0.114604
ENSMUSG00000103473	Gm37696	0	0.960488	0	0	0	1.84009	3.98708	2.44409	0.240122	2.06781	-2.76546	0.11461
ENSMUSG00000097643	A130051J06Rik	8.81487	8.64439	10.0881	12.0502	7.94827	3.68017	2.99031	6.11022	9.89939	5.18224	0.931447	0.114864
ENSMUSG00000057561	Eif1a	923.358	958.567	813.774	797.503	748.021	1005.61	896.097	1796.4	873.301	1111.53	-0.34676	0.115043
ENSMUSG00000025991	Cps1	51982.4	41590.1	31982.7	29628.1	34362.2	43514.3	50490.4	65684.8	38795.8	48512.9	-0.322455	0.115082
ENSMUSG00000089735	Gm8428	2.20372	0.960488	0	5.47736	0	0	0.99677	0	2.16039	0.249193	2.8116	0.115381
ENSMUSG00000112824	AC164624.1	5.50929	4.80244	4.20338	4.38189	1.76628	3.68017	0.99677	0	4.72425	1.61081	1.48617	0.115445
ENSMUSG00000066245	Gm10156	5.50929	7.6839	17.6542	7.6683	16.7797	21.161	14.9516	13.4425	9.62892	16.5837	-0.762374	0.115634
ENSMUSG00000100763	Gm28777	1.10186	0	0	0	0	0	5.98062	3.66613	0.275465	2.41169	-2.98309	0.115688
ENSMUSG00000062545	Tlr12	693.069	822.177	812.934	983.733	830.153	754.435	684.781	422.827	827.978	673.049	0.296974	0.11586
ENSMUSG00000044968	Napepld	48.4818	60.5107	51.2812	44.9143	40.6245	45.0821	38.874	30.5511	51.297	38.7829	0.397423	0.116283
ENSMUSG00000029209	Gnpda2	63.9078	52.8268	52.9626	62.4419	36.2088	42.322	51.8321	48.8817	58.0348	44.8111	0.375358	0.116455
ENSMUSG00000061815	Rufy4	48.4818	52.8268	36.1491	88.7332	37.0919	42.322	51.8321	28.107	56.5477	39.8382	0.492724	0.116471
ENSMUSG00000028782	Adgrb2	5.50929	0.960488	6.72541	6.57283	0.883142	2.76013	0.99677	2.44409	4.942	1.77103	1.49714	0.116506
ENSMUSG00000058569	Tmed9	1491.92	1372.54	1204.69	1425.21	1593.19	1471.15	1401.46	1769.52	1373.59	1558.83	-0.182589	0.116512
ENSMUSG00000114610	AC100729.1	4.40743	4.80244	4.20338	5.47736	0.883142	0.920043	2.99031	2.44409	4.72265	1.8094	1.41776	0.116564
ENSMUSG00000078528	Gm17068	1.10186	0	3.3627	2.19094	0	0	0	0	1.66388	0	3.18961	0.116578
ENSMUSG00000032290	Ptpn9	490.327	530.189	393.436	488.58	388.582	460.021	363.821	425.271	475.633	409.424	0.215247	0.116677
ENSMUSG00000060371	Caln1	81.5375	90.2858	110.129	113.929	162.498	101.205	124.596	107.54	98.9702	123.96	-0.326822	0.116682
ENSMUSG00000058706	0610030E20Rik	13.2223	13.4468	9.24744	9.85924	15.0134	16.5608	24.9193	15.8866	11.444	18.095	-0.66557	0.116726
ENSMUSG00000068629	Gm6155	3.30558	7.6839	6.72541	5.47736	2.64942	1.84009	2.99031	2.44409	5.79806	2.48098	1.2377	0.116852
ENSMUSG00000022871	Fetub	3652.66	4517.17	4335.37	3807.86	4346.82	4246	4306.05	6140.77	4078.27	4759.91	-0.222509	0.116872
ENSMUSG00000097879	Gm26869	2.20372	2.88146	0.840676	3.28641	5.29885	3.68017	4.98385	8.5543	2.30307	5.62929	-1.29918	0.116993
ENSMUSG00000097253	Gm26770	11.0186	3.84195	8.40676	5.47736	3.53257	4.60021	0.99677	3.66613	7.18616	3.19892	1.16198	0.117046
ENSMUSG00000082896	Gm5844	11.0186	4.80244	3.3627	7.6683	11.4808	11.9606	5.98062	20.7747	6.71301	12.5492	-0.913425	0.117062
ENSMUSG00000113852	AC159193.3	16.5279	5.76293	5.04406	6.57283	2.64942	0	6.97739	4.88817	8.47692	3.62875	1.23887	0.117084
ENSMUSG00000062582	Rpl30-ps8	8.81487	34.5776	14.2915	13.1457	0.883142	1.84009	9.9677	20.7747	17.7074	8.36642	1.12631	0.117118
ENSMUSG00000081957	Ak3l2-ps	40.7688	56.6688	82.3863	41.6279	85.6647	80.9638	97.6835	42.7715	55.3629	76.7709	-0.46849	0.117465
ENSMUSG00000109032	Gm7972	1.10186	0	0.840676	3.28641	3.53257	1.84009	8.97093	2.44409	1.30724	4.19692	-1.72987	0.117717
ENSMUSG00000053263	Gm12592	4.40743	2.88146	2.52203	2.19094	0	1.84009	0.99677	0	3.00047	0.709214	2.02938	0.117771
ENSMUSG00000042524	Sun2	2409.77	2026.63	2142.04	2181.08	2517.84	2445.47	2317.49	2408.65	2189.88	2422.36	-0.145998	0.117817
ENSMUSG00000048450	Msx1	5.50929	3.84195	7.56608	2.19094	0.883142	0	4.98385	0	4.77707	1.46675	1.70044	0.118033
ENSMUSG00000035299	Mid1	94.7598	41.301	39.5118	33.9596	39.7414	34.9616	44.8547	20.7747	52.3831	35.0831	0.564727	0.118179
ENSMUSG00000022385	Gtse1	24.2409	22.0912	24.3796	33.9596	28.2605	17.4808	11.9612	8.5543	26.1678	16.5642	0.632227	0.118296
ENSMUSG00000082044	Snrpert	56.1948	81.6415	45.3965	64.6328	52.1054	54.2825	25.916	48.8817	61.9664	45.2964	0.448505	0.118317
ENSMUSG00000084098	Gm13422	4.40743	0.960488	1.68135	3.28641	2.64942	4.60021	5.98062	12.2204	2.58392	6.36267	-1.30254	0.118572
ENSMUSG00000109429	Gm45223	9.91673	2.88146	4.20338	6.57283	0	0.920043	1.99354	6.11022	5.8936	2.25595	1.46336	0.118624
ENSMUSG00000001420	Tmem79	51.7874	60.5107	48.7592	62.4419	75.9502	49.6823	82.7319	80.6549	55.8748	72.2548	-0.369225	0.118657
ENSMUSG00000114709	AC157650.3	9.91673	5.76293	7.56608	17.5275	5.29885	8.28038	3.98708	2.44409	10.1933	5.0026	0.987073	0.118753
ENSMUSG00000025738	Fbxl16	15.426	12.4863	15.9728	16.4321	6.18199	11.9606	10.9645	7.33226	15.0793	9.10982	0.721613	0.118921
ENSMUSG00000049184	Purg	47.3799	37.459	34.4677	42.7234	27.3774	34.0416	30.8999	26.885	40.5075	29.801	0.433107	0.119035
ENSMUSG00000061313	Ddhd2	690.865	610.87	596.039	649.615	531.651	560.306	574.14	602.467	636.847	567.141	0.16732	0.119043
ENSMUSG00000104669	Gm38411	2.20372	3.84195	4.20338	4.38189	10.5977	7.36034	12.958	1.22204	3.65773	8.03452	-1.1481	0.119153
ENSMUSG00000103409	Lsmem2	7.71301	3.84195	0.840676	6.57283	0	1.84009	1.99354	2.44409	4.74212	1.56943	1.61412	0.119156
ENSMUSG00000096751	Gm28373	8.81487	3.84195	2.52203	3.28641	0	0	4.98385	0	4.61632	1.24596	1.87848	0.119245
ENSMUSG00000027204	Fbn1	152.057	133.508	182.427	166.512	129.822	145.367	138.551	114.872	158.626	132.153	0.261667	0.119276
ENSMUSG00000108555	Gm18310	0	0.960488	0.840676	0	3.53257	1.84009	4.98385	0	0.450291	2.58913	-2.42598	0.119336
ENSMUSG00000087338	Scpep1os	0	2.88146	0.840676	1.09547	5.29885	0.920043	2.99031	7.33226	1.2044	4.13537	-1.73977	0.119344
ENSMUSG00000014077	Chp1	7556.55	8109.4	7512.28	6909.14	8275.92	7410.94	8296.12	10133.2	7521.84	8529.04	-0.181079	0.119421
ENSMUSG00000006850	Tmco6	126.714	111.417	116.013	117.215	148.368	124.206	145.528	141.757	117.84	139.965	-0.249171	0.119584
ENSMUSG00000067575	Rpl35a-ps3	0	2.88146	3.3627	3.28641	6.18199	7.36034	2.99031	7.33226	2.38265	5.96623	-1.29495	0.119636
ENSMUSG00000027429	Sec23b	787.829	870.202	767.537	892.809	840.751	834.479	969.858	1228.15	829.594	968.31	-0.221692	0.119648
ENSMUSG00000074676	Foxs1	11.0186	14.4073	12.6101	20.814	7.06513	8.28038	7.97416	12.2204	14.7125	8.88503	0.741038	0.11968
ENSMUSG00000020021	Fgd6	654.504	629.119	716.256	719.725	702.981	803.197	749.571	796.772	679.901	763.13	-0.165771	0.11983
ENSMUSG00000040481	Bptf	717.31	700.196	700.283	736.157	590.822	621.949	662.852	684.344	713.486	639.992	0.157938	0.119881
ENSMUSG00000034761	Map4k5	296.4	276.62	248.84	290.3	267.592	279.693	396.715	383.722	278.04	331.93	-0.254035	0.119922
ENSMUSG00000071064	Zfp827	4.40743	8.64439	15.1322	12.0502	6.18199	2.76013	6.97739	4.88817	10.0585	5.20192	0.964393	0.12
ENSMUSG00000022526	Zfp251	27.5465	33.6171	36.9897	38.3415	46.8065	52.4424	53.8256	30.5511	34.1237	45.9064	-0.434295	0.12003
ENSMUSG00000107549	Gm43961	14.3242	11.5259	2.52203	3.28641	0	3.68017	6.97739	1.22204	7.91461	2.9699	1.40294	0.120062
ENSMUSG00000028469	Npr2	1746.45	1162.19	1791.48	1773.57	2140.74	1485.87	2069.3	2027.37	1618.42	1930.82	-0.254601	0.120117
ENSMUSG00000046610	Oacyl	0	0	0	0	0.883142	2.76013	0.99677	1.22204	0	1.46552	-3.00821	0.120281
ENSMUSG00000054752	Fsd1l	7.71301	2.88146	2.52203	6.57283	8.83142	4.60021	10.9645	14.6645	4.92233	9.76516	-1.00223	0.120328
ENSMUSG00000039396	Neil3	2.20372	2.88146	5.04406	10.9547	1.76628	1.84009	2.99031	1.22204	5.27099	1.95468	1.41251	0.120421
ENSMUSG00000078190	Dnm3os	36.3613	17.2888	8.40676	14.2411	6.18199	11.9606	18.9386	3.66613	19.0745	10.1868	0.883377	0.12044
ENSMUSG00000110369	Gm45349	4.40743	2.88146	0.840676	4.38189	1.76628	0	0	1.22204	3.12787	0.747082	2.05433	0.120485
ENSMUSG00000022026	Olfm4	2.20372	21.1307	6.72541	0	0	6.4403	0.99677	1.22204	7.51496	2.16478	1.79021	0.120545
ENSMUSG00000106219	5830416I19Rik	0	0	0	0	0	1.84009	0	6.11022	0	1.98758	-3.41543	0.120594
ENSMUSG00000032528	Vipr1	950.904	916.305	1168.54	838.036	1162.21	1249.42	931.98	1153.61	968.446	1124.31	-0.214483	0.120691
ENSMUSG00000006958	Chrd	210.455	126.784	116.854	193.898	199.59	189.529	209.322	201.637	161.998	200.019	-0.309787	0.120707
ENSMUSG00000107017	Gm43196	2.20372	0.960488	0	1.09547	2.64942	0.920043	4.98385	6.11022	1.06492	3.66588	-1.82035	0.121027
ENSMUSG00000089984	Fbxo24	14.3242	10.5654	4.20338	4.38189	1.76628	2.76013	7.97416	2.44409	8.3687	3.73617	1.15622	0.121163
ENSMUSG00000084865	Gm15723	0	0	0	0	2.64942	2.76013	0.99677	0	0	1.60158	-3.15477	0.121178
ENSMUSG00000087305	A430035B10Rik	39.6669	54.7478	56.3253	42.7234	30.91	25.7612	50.8353	35.4393	48.3659	35.7364	0.446948	0.121183
ENSMUSG00000048970	C1galt1c1	296.4	320.803	316.094	290.3	317.931	322.935	343.886	448.49	305.899	358.31	-0.223387	0.121347
ENSMUSG00000058441	Panx2	1.10186	1.92098	0	1.09547	4.41571	0.920043	3.98708	4.88817	1.02958	3.55275	-1.80839	0.121356
ENSMUSG00000016487	Ppfibp1	1149.24	1138.18	991.157	965.11	839.868	1030.45	736.613	1049.74	1060.92	914.166	0.215338	0.121444
ENSMUSG00000062590	Armc9	155.362	141.192	114.332	154.461	118.341	113.165	106.654	130.759	141.337	117.23	0.267935	0.121702
ENSMUSG00000113165	AC115037.1	2.20372	0	1.68135	0	3.53257	0.920043	3.98708	6.11022	0.971267	3.63748	-1.87343	0.12205
ENSMUSG00000084923	Gm15611	33.0558	34.5776	30.2643	36.1506	24.728	44.162	45.8514	78.2108	33.5121	48.2381	-0.512733	0.12216
ENSMUSG00000056413	Adap1	122.306	118.14	153.003	111.738	128.056	116.845	86.719	36.6613	126.297	92.0703	0.448332	0.122419
ENSMUSG00000032122	Slc37a2	115.695	98.9302	116.854	106.261	75.9502	96.6045	105.658	79.4328	109.435	89.4113	0.290608	0.122442
ENSMUSG00000087590	Epb41l4aos	107.982	148.876	137.871	116.12	172.213	151.807	128.583	166.198	127.712	154.7	-0.272227	0.122448
ENSMUSG00000044313	Mab21l3	24.2409	6.72341	15.1322	9.85924	10.5977	11.0405	4.98385	2.44409	13.9889	7.26654	0.909639	0.122492
ENSMUSG00000032565	Nudt16	200.538	218.991	179.905	167.607	173.979	169.288	165.464	138.091	191.76	161.705	0.242122	0.122567
ENSMUSG00000072573	Gm10369	5.50929	6.72341	3.3627	5.47736	1.76628	0	3.98708	2.44409	5.26819	2.04936	1.38223	0.122877
ENSMUSG00000026688	Mgst3	587.291	679.065	603.605	762.448	565.211	640.35	614.011	347.06	658.102	541.658	0.278557	0.122916
ENSMUSG00000010067	Rassf1	175.196	129.666	116.854	116.12	101.561	105.805	97.6835	131.981	134.459	109.258	0.301274	0.122987
ENSMUSG00000028133	Rwdd3	120.103	101.812	110.129	104.07	80.3659	88.3241	113.632	69.6565	109.028	87.9946	0.304984	0.122991
ENSMUSG00000097222	1010001N08Rik	30.852	27.8541	25.2203	23.0049	34.4425	34.9616	37.8773	37.8833	26.7328	36.2912	-0.440214	0.123004
ENSMUSG00000050930	Map10	9.91673	10.5654	12.6101	7.6683	17.6628	15.6407	15.9483	15.8866	10.1901	16.2846	-0.666038	0.123053
ENSMUSG00000043740	B430306N03Rik	115.695	119.1	116.854	125.979	87.431	119.606	89.7093	97.7635	119.407	98.6273	0.274644	0.123169
ENSMUSG00000030861	Acadsb	1992.16	2282.12	2100.01	1887.5	2080.68	2014.89	2474.98	3072.22	2065.45	2410.69	-0.222158	0.123343
ENSMUSG00000083822	Hmgb1-ps5	0	2.88146	1.68135	3.28641	0	0.920043	0	0	1.96231	0.230011	2.70022	0.123405
ENSMUSG00000024013	Fgd2	232.492	202.663	258.928	199.376	186.343	209.77	212.312	103.874	223.365	178.075	0.322805	0.123445
ENSMUSG00000029499	Pxmp2	1747.55	1811.48	2106.73	1607.06	2436.59	1939.45	1891.87	2046.92	1818.2	2078.71	-0.19285	0.123461
ENSMUSG00000053522	Lgals7	7.71301	0.960488	0.840676	3.28641	0.883142	0	0.99677	1.22204	3.20015	0.775489	2.05581	0.123585
ENSMUSG00000038253	Hoxa5	19.8335	17.2888	22.6983	33.9596	11.4808	13.8006	14.9516	21.9968	23.445	15.5575	0.60554	0.123585
ENSMUSG00000037890	Wdr19	70.519	72.9971	58.8473	55.869	41.5077	54.2825	64.7901	36.6613	64.5581	49.3104	0.383028	0.123632
ENSMUSG00000040524	Zfp609	555.337	425.496	435.47	389.988	509.573	458.181	611.02	532.811	451.573	527.896	-0.225458	0.123636
ENSMUSG00000107997	Gm44243	15.426	19.2098	13.4508	8.76377	9.71456	5.52026	8.97093	9.77635	14.2126	8.49552	0.753294	0.123646
ENSMUSG00000024521	Pmaip1	30.852	40.3405	38.6711	19.7185	23.8448	23.0011	22.9257	21.9968	32.3955	22.9421	0.505319	0.123647
ENSMUSG00000024036	Slc37a1	113.491	85.4834	70.6168	92.0196	66.2356	126.966	90.7061	221.19	90.4028	126.274	-0.477922	0.12365
ENSMUSG00000038773	Kdm3b	734.94	632.961	566.616	630.992	683.552	668.871	744.587	839.544	641.377	734.138	-0.194565	0.123681
ENSMUSG00000081277	Gm15285	3.30558	5.76293	3.3627	1.09547	0.883142	1.84009	0.99677	0	3.38167	0.929999	1.81448	0.123695
ENSMUSG00000103983	Gm20045	37.4632	16.3283	21.8576	27.3868	8.83142	11.0405	27.9096	17.1086	25.759	16.2225	0.670078	0.123718
ENSMUSG00000102553	D930036K23Rik	3.30558	2.88146	1.68135	4.38189	0	0	1.99354	1.22204	3.06257	0.803896	1.98681	0.123719
ENSMUSG00000017631	Abr	299.706	252.608	320.298	294.682	231.383	281.533	274.112	206.525	291.823	248.388	0.230318	0.123733
ENSMUSG00000003534	Ddr1	210.455	115.259	234.549	144.602	138.653	168.368	149.516	54.9919	176.216	127.882	0.45822	0.123787
ENSMUSG00000021838	Samd4	136.63	118.14	109.288	124.884	108.626	115.005	89.7093	87.9871	122.236	100.332	0.276381	0.123893
ENSMUSG00000089838	Gm2962	66.1115	67.2341	57.166	66.8238	110.393	70.8433	69.7739	74.5446	64.3339	81.3886	-0.346472	0.123962
ENSMUSG00000028961	Pgd	1003.79	1001.79	1102.97	1191.87	1050.06	1018.49	930.983	662.347	1075.11	915.468	0.230278	0.124036
ENSMUSG00000084127	Gm13169	8.81487	11.5259	7.56608	14.2411	3.53257	7.36034	5.98062	6.11022	10.537	5.74594	0.873847	0.12417
ENSMUSG00000033933	Vhl	238.001	224.754	211.01	223.476	249.929	264.052	252.183	259.073	224.31	256.309	-0.193728	0.124199
ENSMUSG00000040964	Arhgef10l	704.088	506.177	634.71	766.83	850.465	718.553	695.746	777.22	652.951	760.496	-0.221118	0.124269
ENSMUSG00000033883	D3Ertd254e	76.0283	80.681	71.4575	66.8238	48.5728	50.6023	77.7481	54.9919	73.7476	57.9788	0.349728	0.124341
ENSMUSG00000006529	Itih1	7764.8	7367.9	7529.94	8857.98	8659.2	8680.6	8586.18	8815.82	7880.15	8685.45	-0.140471	0.124437
ENSMUSG00000037217	Syn1	35.2595	15.3678	33.627	14.2411	14.1303	21.161	12.958	14.6645	24.6239	15.7284	0.646851	0.124526
ENSMUSG00000091957	Rps2-ps10	382.345	464.876	530.467	452.43	571.393	517.064	479.447	540.143	457.529	527.012	-0.202014	0.124532
ENSMUSG00000038260	Trpm4	163.075	115.259	178.223	154.461	128.939	129.726	146.525	83.0989	152.755	122.072	0.318434	0.124656
ENSMUSG00000086108	Gm5602	12.1204	10.5654	17.6542	13.1457	12.364	9.20043	5.98062	1.22204	13.3714	7.19177	0.859727	0.124676
ENSMUSG00000030353	Tead4	15.426	12.4863	12.6101	14.2411	17.6628	20.2409	25.916	18.3306	13.6909	20.5376	-0.591313	0.124688
ENSMUSG00000097335	Gm26563	2.20372	5.76293	4.20338	4.38189	0	1.84009	0	3.66613	4.13798	1.37655	1.68027	0.124724
ENSMUSG00000062098	Btbd3	130.019	129.666	170.657	129.266	123.64	123.286	105.658	113.65	139.902	116.558	0.265938	0.124731
ENSMUSG00000005800	Mmp8	1.10186	2.88146	6.72541	2.19094	2.64942	11.0405	5.98062	10.9984	3.22492	7.66724	-1.19237	0.124853
ENSMUSG00000052562	Slc22a30	1375.12	1398.47	1180.31	1621.3	1466.9	1145.45	2113.15	2065.25	1393.8	1697.69	-0.284277	0.125192
ENSMUSG00000019027	Dnah1	5.50929	2.88146	1.68135	0	1.76628	3.68017	8.97093	12.2204	2.51803	6.65945	-1.39001	0.125265
ENSMUSG00000074671	Tspyl3	13.2223	11.5259	15.9728	4.38189	20.3123	14.7207	19.9354	18.3306	11.2757	18.3247	-0.683469	0.125335
ENSMUSG00000023912	Slc25a27	30.852	29.7751	13.4508	38.3415	16.7797	18.4009	19.9354	19.5527	28.1049	18.6672	0.580456	0.125343
ENSMUSG00000073002	Vamp5	15.426	7.6839	9.24744	9.85924	12.364	11.9606	54.8224	3.66613	10.5542	20.7033	-0.982598	0.12542
ENSMUSG00000023805	Synj2	330.558	293.909	363.172	360.41	308.216	322.015	291.057	230.966	337.012	288.064	0.222913	0.12546
ENSMUSG00000031327	Chic1	18.7316	19.2098	21.8576	23.0049	30.0268	24.8412	26.9128	35.4393	20.701	29.305	-0.493466	0.125468
ENSMUSG00000040978	Gm11992	29.7502	31.6961	32.7864	21.9094	25.6111	20.2409	21.9289	12.2204	29.0355	20.0004	0.526295	0.125491
ENSMUSG00000044748	Defb1	148.751	153.678	105.085	92.0196	91.8467	126.046	64.7901	103.874	124.883	96.6391	0.369202	0.125704
ENSMUSG00000029126	Nsg1	25.3428	20.1702	45.3965	16.4321	21.1954	15.6407	16.9451	17.1086	26.8354	17.7225	0.609516	0.125719
ENSMUSG00000006457	Actn3	0	0.960488	1.68135	0	4.41571	0.920043	3.98708	2.44409	0.66046	2.94173	-2.05676	0.125868
ENSMUSG00000026104	Stat1	445.151	508.098	577.544	480.912	413.31	408.499	381.763	530.367	502.926	433.485	0.21834	0.125991
ENSMUSG00000073102	Drc1	23.139	19.2098	26.061	20.814	38.8582	26.6812	36.8805	23.2188	22.3059	31.4097	-0.498443	0.126074
ENSMUSG00000026175	Vil1	15.426	4.80244	10.9288	6.57283	4.41571	6.4403	1.99354	6.11022	9.43252	4.73994	0.99622	0.126144
ENSMUSG00000039193	Nlrc4	20.9353	19.2098	10.9288	19.7185	13.2471	12.8806	10.9645	6.11022	17.6981	10.8006	0.681236	0.126442
ENSMUSG00000023723	Mrps23	7.71301	26.8937	27.7423	13.1457	14.1303	11.9606	4.98385	13.4425	18.8737	11.1293	0.777568	0.126541
ENSMUSG00000096647	Gm6223	3.30558	2.88146	1.68135	3.28641	7.06513	3.68017	2.99031	12.2204	2.7887	6.48901	-1.21349	0.126575
ENSMUSG00000000056	Narf	1122.79	1118.01	1208.05	1354	1158.68	1413.19	1222.04	1872.17	1200.71	1416.52	-0.23753	0.126605
ENSMUSG00000060803	Gstp1	159.77	190.177	199.24	151.175	175.745	114.085	114.629	167.42	175.09	142.97	0.296915	0.12663
ENSMUSG00000021922	Itih4	30490.6	31628.9	22730.2	25388.6	26670	31338.5	28112.9	47146.4	27559.6	33317	-0.273671	0.126771
ENSMUSG00000020651	Slc26a4	5.50929	3.84195	10.0881	10.9547	14.1303	11.0405	17.9419	9.77635	7.59852	13.2222	-0.801248	0.126832
ENSMUSG00000049382	Krt8	10025.8	10225.4	11128.9	11088.4	10295.7	10654.1	8643.99	7861.4	10617.1	9363.79	0.181079	0.126955
ENSMUSG00000040121	Rep15	8.81487	3.84195	7.56608	7.6683	5.29885	1.84009	1.99354	3.66613	6.9728	3.19965	1.11615	0.126995
ENSMUSG00000028773	Fabp3	12.1204	8.64439	10.0881	9.85924	2.64942	5.52026	8.97093	4.88817	10.178	5.5072	0.890226	0.127051
ENSMUSG00000065599	Mir23b	0	0	0	2.19094	2.64942	0.920043	1.99354	4.88817	0.547736	2.6128	-2.34241	0.127183
ENSMUSG00000029700	Slc13a1	0	0	0	0	4.41571	0	2.99031	0	0	1.8515	-3.35538	0.127272
ENSMUSG00000070031	Sp140	52.8892	53.7873	95.8371	72.3011	52.1054	54.2825	51.8321	53.7699	68.7037	52.9975	0.381528	0.127418
ENSMUSG00000030378	Sult2a8	4022.89	6207.63	8579.1	5693.17	8181.42	5261.72	8685.86	13510.9	6125.7	8909.98	-0.540445	0.127434
ENSMUSG00000045545	Krt14	3.30558	6.72341	0.840676	0	0	0.920043	0.99677	0	2.71742	0.479203	2.44254	0.127475
ENSMUSG00000064281	Rpl19-ps1	2.20372	4.80244	3.3627	4.38189	9.71456	6.4403	8.97093	4.88817	3.68769	7.50349	-1.03358	0.12759
ENSMUSG00000086938	4930481A15Rik	104.677	62.4317	82.3863	108.452	143.069	92.0043	90.7061	131.981	89.4866	114.44	-0.358268	0.127593
ENSMUSG00000013419	Zfp651	77.1301	49.9454	89.1117	71.2057	55.6379	72.6834	48.8417	40.3274	71.8482	54.3726	0.395495	0.127622
ENSMUSG00000062624	Cyp2c67	3387.11	3557.65	2959.18	3448.54	3149.28	3199.91	4207.37	5318.33	3338.12	3968.72	-0.249318	0.127957
ENSMUSG00000021214	Akr1c18	4.40743	5.76293	3.3627	6.57283	1.76628	3.68017	1.99354	0	5.02647	1.86	1.37344	0.12797
ENSMUSG00000031751	Amfr	6407.31	6359.39	6250.43	6200.37	7022.74	6948.16	6392.29	7059.74	6304.37	6855.73	-0.120944	0.127974
ENSMUSG00000082383	Gm9670	9.91673	11.5259	10.0881	8.76377	6.18199	4.60021	2.99031	8.5543	10.0736	5.5817	0.874351	0.128048
ENSMUSG00000005413	Hmox1	827.496	953.764	997.883	735.061	786.879	815.158	729.636	754.001	878.551	771.418	0.188548	0.128096
ENSMUSG00000056666	Retsat	18766.9	17427.1	15549.1	15513	19596.9	18649.3	18024.6	18236.6	16814	18626.8	-0.147776	0.128117
ENSMUSG00000034551	Hdx	8.81487	3.84195	0.840676	0	0	0.920043	0.99677	1.22204	3.37437	0.784714	2.13385	0.128236
ENSMUSG00000097185	Gm26596	2.20372	4.80244	0	1.09547	0	0.920043	0	0	2.02541	0.230011	2.73751	0.128259
ENSMUSG00000074653	Lrrc31	0	6.72341	0	1.09547	0	0	0	0	1.95472	0	3.41678	0.128268
ENSMUSG00000052551	Adarb2	1.10186	0.960488	0	0	0.883142	2.76013	4.98385	1.22204	0.515587	2.46229	-2.2981	0.128412
ENSMUSG00000113441	Gm40438	61.7041	80.681	65.5727	72.3011	88.3142	75.4435	95.69	86.7651	70.0647	86.5532	-0.303451	0.128517
ENSMUSG00000090306	Adh6-ps1	414.299	442.785	468.257	513.776	398.297	475.662	565.169	829.767	459.779	567.224	-0.300414	0.128576
ENSMUSG00000060198	Gm11353	29.7502	30.7356	21.8576	32.8641	19.4291	19.3209	16.9451	25.6629	28.8019	20.3395	0.504932	0.128639
ENSMUSG00000093629	Prox2os	2.20372	0.960488	1.68135	2.19094	0	0	0	1.22204	1.75913	0.305511	2.53218	0.128691
ENSMUSG00000038224	Serpinf2	10337.6	10806.4	9560.17	10448.6	11518.8	11299	10147.1	12765.5	10288.2	11432.6	-0.152117	0.128693
ENSMUSG00000032463	Faim	132.223	166.164	131.145	117.215	109.51	114.085	103.664	128.315	136.687	113.893	0.268088	0.128738
ENSMUSG00000094356	Igkv8-28	0	0	3.3627	0	1.76628	1.84009	8.97093	2.44409	0.840676	3.75535	-2.03999	0.128794
ENSMUSG00000057969	Sema3b	135.529	122.942	158.888	208.14	121.874	150.887	138.551	78.2108	156.375	122.381	0.346999	0.128971
ENSMUSG00000078651	Aoc2	24.2409	11.5259	8.40676	15.3366	22.0785	17.4808	18.9386	34.2172	14.8775	23.1788	-0.646868	0.129007
ENSMUSG00000018395	Kif3a	109.084	100.851	87.4303	109.547	73.3008	96.6045	76.7513	85.543	101.728	83.0499	0.28955	0.129046
ENSMUSG00000020889	Nr1d1	1798.23	1687.58	1394.68	1846.97	1493.39	1514.39	1096.45	1661.98	1681.86	1441.55	0.222301	0.129105
ENSMUSG00000039982	Dtx4	386.752	313.119	321.979	374.651	268.475	369.857	249.193	295.734	349.125	295.815	0.23706	0.129123
ENSMUSG00000026721	Rabgap1l	698.578	778.956	713.734	747.112	590.822	677.151	680.794	683.122	734.595	657.972	0.159886	0.129169
ENSMUSG00000026890	Lhx6	138.834	170.006	156.366	159.939	163.381	124.206	131.574	89.2092	156.286	127.092	0.291711	0.129311
ENSMUSG00000087357	Gm12498	4.40743	0.960488	2.52203	0	0	0	0.99677	0	1.97249	0.249193	2.70476	0.129432
ENSMUSG00000039942	Ptger4	14.3242	32.6566	36.9897	25.1958	24.728	13.8006	22.9257	8.5543	27.2916	17.5022	0.635041	0.129558
ENSMUSG00000083734	Gm16209	4.40743	4.80244	3.3627	9.85924	3.53257	0.920043	0.99677	3.66613	5.60796	2.27888	1.30532	0.129583
ENSMUSG00000087397	Rapgef3os2	2.20372	0.960488	0.840676	3.28641	0	0.920043	0	0	1.82282	0.230011	2.57109	0.129639
ENSMUSG00000110751	C230053D17Rik	4.40743	2.88146	0	3.28641	0	0	0.99677	1.22204	2.64383	0.554703	2.35504	0.129726
ENSMUSG00000065434	Mir7-1	5.50929	1.92098	0.840676	1.09547	2.64942	1.84009	5.98062	14.6645	2.3416	6.28366	-1.42218	0.129753
ENSMUSG00000040254	Sema3d	48.4818	66.2737	63.8914	75.5875	43.2739	45.0821	55.8191	54.9919	63.5586	49.7918	0.35892	0.129755
ENSMUSG00000000308	Ckmt1	4.40743	7.6839	15.1322	1.09547	1.76628	4.60021	1.99354	3.66613	7.07974	3.00654	1.27018	0.129835
ENSMUSG00000063902	Gm7964	776.81	629.119	590.155	581.695	533.418	543.745	540.25	630.574	644.445	561.997	0.19797	0.129865
ENSMUSG00000076575	Igkv7-33	0	0	0	0	0.883142	0.920043	0	4.88817	0	1.67284	-3.16189	0.130017
ENSMUSG00000040891	Foxa3	1100.76	1175.64	1410.65	1079.04	1223.15	1521.75	1154.26	1664.42	1191.52	1390.9	-0.221907	0.130187
ENSMUSG00000058799	Nap1l1	1097.45	1356.21	1214.78	1178.73	990.885	1135.33	1076.51	1130.39	1211.79	1083.28	0.162668	0.130194
ENSMUSG00000083116	Gm13410	3.30558	1.92098	0.840676	0	1.76628	3.68017	3.98708	8.5543	1.51681	4.49696	-1.55677	0.130218
ENSMUSG00000047988	4933428G20Rik	5.50929	7.6839	7.56608	3.28641	3.53257	2.76013	1.99354	2.44409	6.01142	2.68258	1.16574	0.130336
ENSMUSG00000029602	Rasal1	27.5465	19.2098	16.8135	19.7185	10.5977	11.9606	21.9289	8.5543	20.8221	13.2604	0.638018	0.130572
ENSMUSG00000047369	Dnah14	0	0	0.840676	0	2.64942	0	3.98708	1.22204	0.210169	1.96464	-2.70829	0.130588
ENSMUSG00000027018	Hat1	150.955	227.636	178.223	211.426	146.602	173.888	161.477	162.532	192.06	161.125	0.254405	0.1306
ENSMUSG00000085945	2310014F06Rik	3.30558	4.80244	4.20338	1.09547	1.76628	0	0.99677	1.22204	3.35172	0.996274	1.77064	0.130621
ENSMUSG00000052684	Jun	1205.43	765.509	1050.85	1244.46	908.753	1183.17	577.13	762.555	1066.56	857.903	0.313111	0.130719
ENSMUSG00000082186	Gm12403	1.10186	3.84195	3.3627	5.47736	1.76628	0	1.99354	0	3.44597	0.939956	1.8291	0.13075
ENSMUSG00000004100	Ppan	320.641	222.833	253.884	312.209	284.372	315.575	323.95	389.832	277.392	328.432	-0.243549	0.130797
ENSMUSG00000093026	Gm25301	3.30558	0.960488	0	2.19094	4.41571	0.920043	5.98062	7.33226	1.61425	4.66216	-1.57299	0.130877
ENSMUSG00000057697	Vmn1r53	1.10186	0.960488	0	1.09547	2.64942	5.52026	3.98708	0	0.789454	3.03919	-2.02133	0.130888
ENSMUSG00000006442	Srm	944.293	794.323	1138.28	927.864	1221.38	1088.41	1028.67	1025.29	951.189	1090.94	-0.197663	0.130938
ENSMUSG00000024386	Proc	8523.98	8281.32	9834.23	9591.95	10668.4	9477.36	9889.96	10058.6	9057.87	10023.6	-0.146116	0.130954
ENSMUSG00000030880	Polr3e	368.021	296.791	359.809	325.355	451.285	383.658	357.841	360.503	337.494	388.322	-0.204155	0.131125
ENSMUSG00000075266	Cenpw	16.5279	31.6961	17.6542	36.1506	18.546	18.4009	17.9419	12.2204	25.5072	16.7773	0.589226	0.131216
ENSMUSG00000069171	Nr2f1	52.8892	23.0517	31.9457	39.437	30.91	24.8412	20.9322	26.885	36.8309	25.8921	0.498284	0.131248
ENSMUSG00000022094	Slc39a14	4929.72	3926.47	3495.53	4195.66	3458.38	4863.35	4315.02	8030.05	4136.84	5166.7	-0.320539	0.131326
ENSMUSG00000076594	Igkv6-13	3.30558	0.960488	0	2.19094	0	0	0	0	1.61425	0	3.11596	0.131344
ENSMUSG00000087662	Gm11373	2.20372	0.960488	0	3.28641	0	0	0	0	1.61265	0	3.11482	0.131558
ENSMUSG00000038534	Osbpl7	96.9636	90.2858	110.969	105.165	87.431	102.125	74.7578	57.436	100.846	80.4374	0.317966	0.13158
ENSMUSG00000029467	Atp2a2	4085.69	3279.11	2741.44	3358.72	3227.88	3772.17	3474.74	5885.36	3366.24	4090.04	-0.280804	0.131628
ENSMUSG00000031958	Ldhd	7315.24	7026.93	7824.17	7668.3	9134.33	7874.65	7587.42	8372.22	7458.66	8242.15	-0.144105	0.131638
ENSMUSG00000023411	Nfatc4	51.7874	22.0912	31.9457	29.5777	15.0134	32.2015	28.9063	13.4425	33.8505	22.3909	0.582734	0.131645
ENSMUSG00000066153	Mup21	672.134	1482.99	1111.37	1137.1	1132.19	1061.73	1371.56	4004.64	1100.9	1892.53	-0.781322	0.131741
ENSMUSG00000024983	Vti1a	325.048	386.116	336.27	323.164	317.931	313.735	285.076	284.736	342.65	300.369	0.189193	0.131794
ENSMUSG00000035382	Pcsk7	859.45	766.469	809.571	821.604	889.324	938.444	878.155	888.425	814.273	898.587	-0.142859	0.131976
ENSMUSG00000096215	Smim22	60.6022	48.9849	64.7321	64.6328	59.1705	69.9232	95.69	79.4328	59.738	76.0541	-0.344523	0.132036
ENSMUSG00000075289	Carns1	4.40743	1.92098	4.20338	1.09547	0.883142	1.84009	0	0	2.90682	0.680807	2.02077	0.132119
ENSMUSG00000037418	Best1	3.30558	1.92098	0.840676	1.09547	0	0	0.99677	0	1.79067	0.249193	2.55228	0.132307
ENSMUSG00000029657	Hsph1	1386.14	1151.62	954.167	949.774	1075.67	1356.14	1171.21	2871.8	1110.43	1618.7	-0.54341	0.13233
ENSMUSG00000060407	Cyp2a12	14534.6	13281.6	12446.2	13477.6	14456.1	15077.7	15877.6	13763.9	13435	14793.8	-0.139107	0.132336
ENSMUSG00000056718	Gm13199	7.71301	4.80244	3.3627	6.57283	3.53257	0	3.98708	1.22204	5.61275	2.18542	1.3323	0.132475
ENSMUSG00000109311	AI314278	23.139	24.0122	15.1322	27.3868	8.83142	28.5213	8.97093	7.33226	22.4175	13.414	0.718715	0.132495
ENSMUSG00000039716	Dock3	0	0.960488	0	1.09547	2.64942	2.76013	0	4.88817	0.51399	2.57443	-2.34006	0.132767
ENSMUSG00000051379	Flrt3	2.20372	2.88146	5.04406	3.28641	2.64942	0	0.99677	0	3.35391	0.911549	1.8189	0.132866
ENSMUSG00000031799	Tpm4	453.966	515.782	548.961	483.103	377.985	467.382	439.576	475.375	500.453	440.079	0.188454	0.133003
ENSMUSG00000013158	4933405L10Rik	0	0	0	1.09547	1.76628	3.68017	1.99354	0	0.273868	1.86	-2.64982	0.133092
ENSMUSG00000085912	Trp53cor1	4.40743	3.84195	3.3627	5.47736	0	2.76013	0.99677	2.44409	4.27236	1.55025	1.49079	0.133124
ENSMUSG00000056682	4930465K10Rik	0	0	0	0	0.883142	1.84009	0	3.66613	0	1.59734	-3.10601	0.133192
ENSMUSG00000005089	Slc1a2	4690.61	3941.84	3163.46	4795.97	4120.74	3988.38	5406.48	6403.51	4147.97	4979.78	-0.263632	0.133195
ENSMUSG00000060128	Gm2710	3.30558	1.92098	0.840676	1.09547	0.883142	0	0	0	1.79067	0.220785	2.55239	0.133395
ENSMUSG00000026669	Mcm10	1451.15	1695.26	1915.06	2047.44	1866.08	1635.84	2039.39	3088.1	1777.23	2157.35	-0.278884	0.13349
ENSMUSG00000098488	Pla2g4b	11.0186	3.84195	9.24744	6.57283	13.2471	8.28038	20.9322	10.9984	7.6702	13.3645	-0.803993	0.133667
ENSMUSG00000034258	Flvcr2	204.946	183.453	217.735	197.185	186.343	201.489	161.477	106.318	200.83	163.907	0.286877	0.133715
ENSMUSG00000111356	Rpl32l	3.30558	1.92098	5.04406	4.38189	0.883142	1.84009	0.99677	1.22204	3.66312	1.23551	1.57095	0.133733
ENSMUSG00000104369	Gm38082	5.50929	2.88146	2.52203	2.19094	0.883142	1.84009	0.99677	0	3.27593	0.929999	1.74821	0.133967
ENSMUSG00000034413	Neurl1b	22.0372	24.9727	38.6711	39.437	23.8448	21.161	21.9289	21.9968	31.2795	22.2329	0.495754	0.134014
ENSMUSG00000083121	Gm6341	0	0	3.3627	5.47736	0.883142	0	0	0	2.21002	0.220785	2.86951	0.13425
ENSMUSG00000023944	Hsp90ab1	19474.3	20193.3	19877.8	17024.7	20867.8	21207	18738.3	25871.9	19142.5	21671.2	-0.178917	0.13431
ENSMUSG00000029432	Nipsnap2	345.984	384.195	368.216	335.214	332.944	306.374	316.973	314.065	358.402	317.589	0.175275	0.134566
ENSMUSG00000074882	Cyp2c68	2437.31	2812.31	1925.15	2316.92	2437.47	2588.08	3208.6	2712.94	2372.92	2736.77	-0.205899	0.13457
ENSMUSG00000047841	Fndc11	1.10186	1.92098	3.3627	3.28641	1.76628	0	0	0	2.41799	0.441571	2.3173	0.134637
ENSMUSG00000031605	Klhl2	543.216	580.135	617.056	560.881	691.5	570.426	585.104	805.327	575.322	663.089	-0.202462	0.134658
ENSMUSG00000029822	Osbpl3	1186.7	1026.76	1315.66	1201.73	1027.98	1268.74	989.793	529.145	1182.71	953.913	0.30902	0.134663
ENSMUSG00000002845	Tmem39a	196.131	175.769	179.905	192.803	181.927	215.29	195.367	307.955	186.152	225.135	-0.269768	0.134674
ENSMUSG00000086499	Gm16217	4.40743	2.88146	4.20338	2.19094	2.64942	4.60021	11.9612	10.9984	3.42081	7.55232	-1.11428	0.13471
ENSMUSG00000042417	Ccno	18.7316	14.4073	7.56608	5.47736	15.0134	25.7612	21.9289	12.2204	11.5456	18.731	-0.713804	0.134739
ENSMUSG00000046380	Jrk	44.0743	40.3405	43.7152	32.8641	55.6379	48.7623	44.8547	59.8801	40.2485	52.2837	-0.37075	0.134786
ENSMUSG00000107883	Gm44062	0	2.88146	0	1.09547	0.883142	2.76013	5.98062	4.88817	0.994234	3.62802	-1.85314	0.134907
ENSMUSG00000015312	Gadd45b	119.001	91.2463	99.1998	83.2558	86.5479	69.0032	64.7901	96.5414	98.1757	79.2206	0.313565	0.134921
ENSMUSG00000022747	St3gal6	42.9725	71.0761	55.4846	40.5324	61.8199	65.323	78.7449	65.9903	52.5164	67.9695	-0.364183	0.134922
ENSMUSG00000102324	Gm19721	11.0186	6.72341	1.68135	9.85924	6.18199	1.84009	1.99354	2.44409	7.32065	3.11493	1.19118	0.135016
ENSMUSG00000020123	Avpr1a	138.834	101.812	100.881	159.939	162.498	141.687	125.593	189.417	125.366	154.799	-0.306666	0.135283
ENSMUSG00000103382	Gm37755	9.91673	13.4468	13.4508	12.0502	6.18199	5.52026	7.97416	9.77635	12.2161	7.36319	0.755163	0.135409
ENSMUSG00000026616	Cr2	7.71301	9.60488	9.24744	8.76377	5.29885	4.60021	6.97739	1.22204	8.83227	4.52462	0.937598	0.135464
ENSMUSG00000014301	Pam16	349.289	441.824	327.864	350.551	414.193	410.339	383.757	496.15	367.382	426.11	-0.212093	0.135519
ENSMUSG00000043126	D830039M14Rik	0	1.92098	3.3627	2.19094	0	0.920043	0	0	1.86866	0.230011	2.64504	0.135538
ENSMUSG00000110599	6030466F02Rik	3.30558	0.960488	1.68135	1.09547	0	0	0.99677	0	1.76072	0.249193	2.53346	0.135701
ENSMUSG00000088625	Gm23318	1.10186	0	1.68135	1.09547	2.64942	1.84009	4.98385	3.66613	0.969671	3.28487	-1.73657	0.135721
ENSMUSG00000073716	Gm13241	11.0186	5.76293	11.7695	15.3366	6.18199	2.76013	8.97093	6.11022	10.9719	6.00582	0.871487	0.135762
ENSMUSG00000043664	Tmem221	35.2595	32.6566	30.2643	19.7185	23.8448	23.9211	18.9386	15.8866	29.4747	20.6478	0.504265	0.135815
ENSMUSG00000054072	Iigp1	6364.34	7810.69	6636.3	6179.56	7162.28	6748.51	6902.63	11245.2	6747.72	8014.67	-0.248013	0.13584
ENSMUSG00000026821	Ralgds	134.427	130.626	187.471	116.12	124.523	119.606	130.577	84.321	142.161	114.757	0.308191	0.135865
ENSMUSG00000074215	Gm10643	6.61115	9.60488	5.88473	8.76377	8.83142	1.84009	0	2.44409	7.71613	3.2789	1.1991	0.136006
ENSMUSG00000037016	Frem2	1.10186	3.84195	0	1.09547	2.64942	2.76013	4.98385	7.33226	1.50982	4.43142	-1.54296	0.136024
ENSMUSG00000034416	Pkd1l2	1.10186	0	1.68135	0	1.76628	4.60021	5.98062	0	0.695803	3.08678	-2.11801	0.136236
ENSMUSG00000059708	Akap17b	44.0743	47.0639	72.2981	55.869	66.2356	75.4435	60.803	79.4328	54.8264	70.4787	-0.351804	0.136251
ENSMUSG00000073840	Mup-ps2	1.10186	4.80244	1.68135	2.19094	1.76628	0	0	0	2.44415	0.441571	2.33077	0.136328
ENSMUSG00000099397	Gm7809	0	1.92098	0	1.09547	5.29885	3.68017	0	3.66613	0.754112	3.16129	-2.08388	0.136417
ENSMUSG00000032750	Gab3	17.6297	8.64439	13.4508	7.6683	8.83142	3.68017	8.97093	4.88817	11.8483	6.59267	0.835902	0.13644
ENSMUSG00000028152	Tspan5	23.139	24.0122	38.6711	24.1004	22.9617	12.8806	23.9225	15.8866	27.4807	18.9128	0.544142	0.136496
ENSMUSG00000038112	AW551984	0	5.76293	3.3627	1.09547	0	0.920043	0.99677	0	2.55528	0.479203	2.37347	0.136545
ENSMUSG00000025856	Pdgfa	143.242	132.547	145.437	170.894	120.107	125.126	140.545	112.428	148.03	124.551	0.245596	0.136555
ENSMUSG00000031673	Cdh11	2.20372	9.60488	0.840676	18.623	0.883142	0.920043	7.97416	1.22204	7.81807	2.74985	1.49882	0.136566
ENSMUSG00000097990	Gm19557	7.71301	9.60488	9.24744	4.38189	0.883142	5.52026	5.98062	2.44409	7.7368	3.70703	1.0676	0.136617
ENSMUSG00000024597	Slc12a2	172.992	172.888	144.596	143.507	188.109	158.247	211.315	189.417	158.496	186.772	-0.236717	0.136671
ENSMUSG00000041891	Lman1	3532.56	3505.78	3027.27	3263.41	3302.95	3525.6	3745.86	4519.12	3332.26	3773.38	-0.179052	0.136732
ENSMUSG00000022111	Uchl3	166.381	228.596	170.657	189.517	133.354	151.807	164.467	185.751	188.788	158.845	0.254118	0.136742
ENSMUSG00000095298	Gm12407	5.50929	0.960488	5.88473	1.09547	0.883142	0.920043	0.99677	1.22204	3.3625	1.0055	1.76553	0.136953
ENSMUSG00000110647	Gm17745	3.30558	0.960488	3.3627	0	0	0.920043	0	0	1.90719	0.230011	2.66659	0.137024
ENSMUSG00000024391	Apom	1952.49	2256.19	2259.74	2236.95	2305	2666.28	2261.67	2431.87	2176.34	2416.21	-0.150599	0.137147
ENSMUSG00000024028	Tff2	0	10.5654	21.0169	0	0.883142	1.84009	4.98385	2.44409	7.89557	2.53779	1.66708	0.137208
ENSMUSG00000020946	Gosr2	1379.53	1510.85	1332.47	1534.76	1537.55	1599.95	1529.05	1696.2	1439.4	1590.69	-0.144059	0.13731
ENSMUSG00000028356	Ambp	39382.6	39883.3	41705.1	40065.8	45407.6	43185.9	41418.8	44275.8	40259.2	43572	-0.114072	0.137329
ENSMUSG00000034308	Sdr42e1	2735.92	3109.1	2574.15	2872.33	3137.8	3047.18	3078.03	3161.43	2822.87	3106.11	-0.138018	0.137363
ENSMUSG00000025268	Maged2	182.909	195.939	234.549	255.245	185.46	216.21	170.448	157.644	217.16	182.44	0.248577	0.137386
ENSMUSG00000034739	Mfrp	0	0	0	1.09547	1.76628	0.920043	2.99031	1.22204	0.273868	1.72467	-2.51976	0.137458
ENSMUSG00000025197	Cyp2c44	1355.29	1772.1	1970.54	1958.7	1944.68	1658.84	2158.01	2551.63	1764.16	2078.29	-0.235614	0.137558
ENSMUSG00000108358	Gm44509	6.61115	10.5654	12.6101	2.19094	4.41571	4.60021	3.98708	2.44409	7.9944	3.86177	1.05231	0.137589
ENSMUSG00000032802	Srxn1	2316.11	2090.98	2122.71	2361.84	2206.97	2267.91	1667.6	1550.77	2222.91	1923.31	0.207951	0.137627
ENSMUSG00000040877	Wdr25	106.88	87.4044	107.607	106.261	126.289	145.367	93.6964	130.759	102.038	124.028	-0.282412	0.137651
ENSMUSG00000002997	Prkar2b	23.139	24.0122	14.2915	28.4823	18.546	8.28038	10.9645	20.7747	22.4812	14.6414	0.622198	0.137665
ENSMUSG00000022665	Ccdc80	695.273	576.293	735.592	615.655	474.247	681.752	620.988	454.6	655.703	557.897	0.232267	0.13779
ENSMUSG00000071855	Ccdc112	5.50929	8.64439	11.7695	7.6683	5.29885	0.920043	5.98062	4.88817	8.39786	4.27192	0.998449	0.13785
ENSMUSG00000000628	Hk2	115.695	117.179	228.664	163.225	130.705	130.646	146.525	62.3242	156.191	117.55	0.40766	0.13793
ENSMUSG00000114321	CT010506.1	24.2409	22.0912	21.8576	17.5275	22.9617	11.9606	10.9645	9.77635	21.4293	13.9158	0.604939	0.137988
ENSMUSG00000104846	Gm43020	0	0.960488	4.20338	1.09547	0	0	0	0	1.56483	0	3.11697	0.138069
ENSMUSG00000103046	Gm37309	12.1204	9.60488	3.3627	14.2411	4.41571	2.76013	6.97739	6.11022	9.83229	5.06586	0.953178	0.13819
ENSMUSG00000114430	AC107763.1	13.2223	35.538	15.9728	13.1457	30.0268	21.161	35.8837	30.5511	19.4697	29.4057	-0.584947	0.138276
ENSMUSG00000102143	Gm38057	6.61115	10.5654	4.20338	7.6683	3.53257	1.84009	3.98708	4.88817	7.26205	3.56198	1.04326	0.138288
ENSMUSG00000024030	Abcg1	229.187	229.557	302.643	245.386	224.318	218.05	227.264	196.749	251.693	216.595	0.217611	0.138604
ENSMUSG00000097928	Gm26578	4.40743	5.76293	5.04406	4.38189	3.53257	0.920043	2.99031	0	4.89908	1.86073	1.34846	0.138621
ENSMUSG00000025650	Col7a1	7.71301	0.960488	1.68135	1.09547	6.18199	5.52026	7.97416	6.11022	2.86258	6.44666	-1.207	0.138677
ENSMUSG00000035960	Apex1	269.955	229.557	248.84	273.868	320.58	258.532	280.092	316.509	255.555	293.929	-0.202365	0.138719
ENSMUSG00000039236	Isg20	106.88	114.298	102.562	117.215	140.42	133.406	107.651	144.201	110.239	131.42	-0.253878	0.138737
ENSMUSG00000090038	Gm16573	219.27	203.623	200.922	166.512	166.031	246.571	239.225	312.843	197.582	241.168	-0.282873	0.138743
ENSMUSG00000049775	Tmsb4x	2278.64	4388.47	4200.86	2701.43	2606.15	3113.42	2875.68	2568.73	3392.35	2791	0.281746	0.138832
ENSMUSG00000032513	Gorasp1	921.154	951.843	927.266	989.211	1133.07	1146.37	924.006	1025.29	947.368	1057.19	-0.159051	0.13913
ENSMUSG00000025481	Urah	2409.77	3082.21	2775.07	2425.37	3164.3	2720.57	2886.65	3298.29	2673.1	3017.45	-0.174297	0.139275
ENSMUSG00000112774	Gm36041	170.788	218.991	142.074	182.944	112.159	200.569	91.7029	156.422	178.699	140.213	0.349781	0.139331
ENSMUSG00000113113	Gm2614	44.0743	42.2615	38.6711	49.2962	52.9885	59.8028	49.8385	58.6581	43.5758	55.322	-0.347886	0.139407
ENSMUSG00000061928	Dsg1b	4.40743	0	4.20338	0	0	0.920043	0	0	2.1527	0.230011	2.83751	0.139493
ENSMUSG00000079645	Gm17193	11.0186	7.6839	5.88473	3.28641	9.71456	5.52026	23.9225	12.2204	6.96841	12.8444	-0.880728	0.139641
ENSMUSG00000001228	Uhrf1	9.91673	16.3283	36.9897	15.3366	15.8965	10.1205	15.9483	3.66613	19.6428	11.4079	0.779455	0.139675
ENSMUSG00000086536	Gm12264	5.50929	3.84195	0.840676	8.76377	3.53257	0	0	2.44409	4.73892	1.49416	1.65395	0.139753
ENSMUSG00000040498	Igsf23	31.9539	31.6961	35.3084	46.0098	60.0536	40.4819	25.916	78.2108	36.242	51.1656	-0.491908	0.139776
ENSMUSG00000087293	Gm14341	0	0	0	0	3.53257	0	0	3.66613	0	1.79967	-3.29001	0.139866
ENSMUSG00000009281	Rarres2	8639.67	8604.05	10780.8	9319.18	11359	9722.09	10305.6	10289.6	9335.93	10419.1	-0.158283	0.140045
ENSMUSG00000026994	Galnt3	18.7316	11.5259	28.583	18.623	13.2471	11.9606	11.9612	13.4425	19.3659	12.6528	0.624058	0.140054
ENSMUSG00000105201	Gm43362	13.2223	9.60488	8.40676	5.47736	7.94827	1.84009	2.99031	6.11022	9.17783	4.72222	0.961107	0.140073
ENSMUSG00000053081	1700069B07Rik	0	0	0	0	1.76628	1.84009	0	2.44409	0	1.51261	-3.04218	0.140076
ENSMUSG00000025007	Aldh18a1	46.2781	46.1034	61.3694	61.3464	45.9234	46.0021	30.8999	42.7715	53.7743	41.3992	0.37742	0.140106
ENSMUSG00000046794	Ppp1r3b	2966.2	2467.49	3851.98	3776.09	3494.59	5179.84	3181.69	3807.89	3265.44	3916	-0.262112	0.14014
ENSMUSG00000109864	Eid3	12.1204	16.3283	6.72541	12.0502	5.29885	5.52026	7.97416	8.5543	11.8061	6.83689	0.796611	0.140151
ENSMUSG00000025173	Wdr45b	581.781	610.87	657.409	611.273	549.314	634.829	693.752	1123.06	615.333	750.238	-0.283618	0.140518
ENSMUSG00000066595	Flvcr1	46.2781	56.6688	42.0338	43.8189	37.0919	33.1215	33.8902	41.5495	47.1999	36.4133	0.379156	0.140564
ENSMUSG00000041716	Gm20604	15.426	29.7751	16.8135	18.623	35.3257	31.2815	20.9322	28.107	20.1594	28.9116	-0.521507	0.140607
ENSMUSG00000090264	Eif4ebp3	37.4632	23.0517	16.8135	7.6683	16.7797	26.6812	30.8999	64.7683	21.2492	34.7823	-0.701061	0.140682
ENSMUSG00000051043	Gprc5c	1079.82	946.08	1084.47	1080.13	1208.14	1232.86	1104.42	1098.62	1047.63	1161.01	-0.149074	0.140892
ENSMUSG00000022003	Slc25a30	1066.6	444.706	790.236	555.404	569.626	718.553	1448.31	1950.38	714.236	1171.72	-0.713888	0.14091
ENSMUSG00000070891	Gm12689	1.10186	0	2.52203	1.09547	4.41571	7.36034	0.99677	2.44409	1.17984	3.80423	-1.67245	0.141023
ENSMUSG00000074340	Ovgp1	2.20372	2.88146	0	1.09547	0	0	0	0	1.54516	0	3.06437	0.141153
ENSMUSG00000100009	Gm7967	0	4.80244	0.840676	1.09547	2.64942	1.84009	2.99031	13.4425	1.68465	5.23057	-1.58077	0.141189
ENSMUSG00000085255	Taco1os	3.30558	4.80244	1.68135	1.09547	6.18199	9.20043	3.98708	4.88817	2.72121	6.06442	-1.1663	0.141196
ENSMUSG00000005873	Reep5	388.956	443.745	397.64	396.561	355.906	416.779	355.847	271.294	406.725	349.957	0.213873	0.14129
ENSMUSG00000030047	Arhgap25	89.2506	110.456	152.162	121.597	87.431	115.925	99.677	78.2108	118.367	95.3111	0.313403	0.14133
ENSMUSG00000111078	Gm35028	1.10186	2.88146	0	2.19094	0	0	0	0	1.54357	0	3.06319	0.141387
ENSMUSG00000107092	Gm7993	14.3242	18.2493	14.2915	13.1457	7.94827	10.1205	7.97416	12.2204	15.0026	9.56583	0.664258	0.141485
ENSMUSG00000033220	Rac2	255.631	380.353	518.697	319.878	316.165	367.097	294.047	190.639	368.64	291.987	0.335874	0.141579
ENSMUSG00000037313	Tacc3	41.8706	24.0122	36.9897	33.9596	18.546	28.5213	31.8967	18.3306	34.208	24.3236	0.484957	0.141626
ENSMUSG00000104689	Gm44482	2.20372	0.960488	5.04406	2.19094	0.883142	3.68017	8.97093	13.4425	2.5998	6.74418	-1.32126	0.1417
ENSMUSG00000088901	Mir1943	5.50929	4.80244	1.68135	9.85924	1.76628	2.76013	2.99031	1.22204	5.46308	2.18469	1.28404	0.1418
ENSMUSG00000059873	Olfr1029	1.10186	0	1.68135	0	0	1.84009	0.99677	10.9984	0.695803	3.45881	-2.22997	0.141827
ENSMUSG00000104873	Gm40332	1.10186	0	0	0	1.76628	2.76013	0.99677	1.22204	0.275465	1.68631	-2.49611	0.141871
ENSMUSG00000111662	Gm7435	3.30558	5.76293	2.52203	4.38189	0	1.84009	0	3.66613	3.9931	1.37655	1.61885	0.141907
ENSMUSG00000067825	Pex26	1162.46	951.843	1077.75	983.733	1107.46	1058.97	1289.82	1241.6	1043.95	1174.46	-0.16942	0.142045
ENSMUSG00000028106	Rprd2	369.123	387.077	380.826	369.174	331.178	299.014	344.883	362.947	376.55	334.505	0.173507	0.142059
ENSMUSG00000092021	Gbp11	81.5375	80.681	170.657	86.5423	91.8467	97.5245	467.485	138.091	104.855	198.737	-0.92114	0.142068
ENSMUSG00000041566	Tssk1	6.61115	5.76293	1.68135	3.28641	9.71456	3.68017	6.97739	14.6645	4.33546	8.75916	-1.01593	0.142069
ENSMUSG00000102202	Gm33280	11.0186	18.2493	13.4508	27.3868	11.4808	7.36034	12.958	12.2204	17.5264	11.0049	0.672092	0.142101
ENSMUSG00000030701	Plekhb1	756.977	797.205	754.927	718.629	1148.97	657.831	749.571	1042.4	756.935	899.693	-0.248796	0.14223
ENSMUSG00000002233	Rhoc	385.651	376.511	438.833	475.435	405.362	397.458	348.87	289.624	419.107	360.329	0.214823	0.142291
ENSMUSG00000057541	Pus7	186.214	235.319	184.108	186.23	202.239	199.649	262.151	277.404	197.968	235.361	-0.245207	0.142353
ENSMUSG00000041117	Ccdc8	46.2781	31.6961	37.8304	43.8189	47.6896	66.2431	57.8127	36.6613	39.9059	52.1017	-0.397432	0.142368
ENSMUSG00000022353	Mtss1	4966.08	4012.92	4242.05	3913.02	4555.24	4682.1	4431.64	5746.05	4283.52	4853.76	-0.180114	0.14242
ENSMUSG00000030029	Lrig1	748.162	510.019	731.388	850.086	706.513	823.438	835.294	992.299	709.914	839.386	-0.241285	0.142436
ENSMUSG00000026343	Gpr39	60.6022	55.7083	63.0507	90.9241	50.3391	42.322	45.8514	70.8785	67.5713	52.3477	0.374862	0.142621
ENSMUSG00000043931	Gimap7	8.81487	8.64439	23.5389	18.623	12.364	6.4403	7.97416	8.5543	14.9053	8.83319	0.759969	0.142671
ENSMUSG00000035875	AI182371	5371.56	6098.14	5176.04	5750.13	5068.35	5955.44	6549.78	8513.98	5598.97	6521.88	-0.219891	0.142824
ENSMUSG00000114818	AC154612.1	2.20372	3.84195	2.52203	1.09547	4.41571	3.68017	4.98385	9.77635	2.41579	5.71402	-1.19988	0.14293
ENSMUSG00000097661	Gm26763	2.20372	2.88146	1.68135	2.19094	0.883142	0.920043	0	0	2.23937	0.450796	2.18519	0.142962
ENSMUSG00000087667	Gm13381	0	0	1.68135	0	0	1.84009	4.98385	3.66613	0.420338	2.62252	-2.44297	0.142963
ENSMUSG00000025270	Alas2	1087.53	1314.91	1551.05	1364.96	1656.77	1420.55	1433.36	1537.33	1329.61	1512	-0.184748	0.142969
ENSMUSG00000092090	Gm3294	0	0	0	1.09547	2.64942	1.84009	0.99677	1.22204	0.273868	1.67708	-2.49019	0.143066
ENSMUSG00000091534	Gm17195	3.30558	1.92098	0	1.09547	4.41571	1.84009	8.97093	2.44409	1.58051	4.4177	-1.53322	0.143166
ENSMUSG00000015536	Mocs2	2252.2	2675.92	2458.98	2506.44	2788.96	2593.6	2758.06	2721.49	2473.38	2715.53	-0.134552	0.143198
ENSMUSG00000040213	Kyat3	2248.89	2681.68	2284.96	2394.7	2359.75	2379.23	2818.87	3570.81	2402.56	2782.17	-0.211011	0.143212
ENSMUSG00000057836	Xlr3a	124.51	89.3254	80.7049	23.0049	113.925	114.085	84.7255	252.963	79.3863	141.425	-0.83104	0.143307
ENSMUSG00000027167	Elp4	143.242	171.927	181.586	175.275	130.705	148.127	151.509	145.423	168.008	143.941	0.226561	0.143415
ENSMUSG00000098274	Rpl24	5.50929	12.4863	5.04406	9.85924	0	7.36034	2.99031	4.88817	8.22473	3.80971	1.12335	0.143627
ENSMUSG00000113170	Gm36839	8.81487	4.80244	1.68135	1.09547	9.71456	4.60021	11.9612	7.33226	4.09853	8.40207	-1.05858	0.143674
ENSMUSG00000050359	Sprr1a	63.9078	88.3649	72.2981	89.8287	60.9368	87.4041	52.8288	12.2204	78.5999	53.3475	0.547624	0.143746
ENSMUSG00000045232	Rln3	5.50929	0	1.68135	0	0	0	0	0	1.79766	0	3.28452	0.143816
ENSMUSG00000005237	Dnah2	7.71301	9.60488	11.7695	10.9547	12.364	12.8806	15.9483	23.2188	10.0105	16.1029	-0.661499	0.143927
ENSMUSG00000082908	Gm13736	150.955	178.651	171.498	180.753	225.201	200.569	178.422	188.195	170.464	198.097	-0.218292	0.144016
ENSMUSG00000098293	Mir6991	2.20372	0.960488	2.52203	1.09547	0	0.920043	0	0	1.69543	0.230011	2.49348	0.144085
ENSMUSG00000074052	BC048644	99.1673	73.9576	53.8033	87.6377	74.1839	48.7623	67.7804	51.3258	78.6415	60.5131	0.366726	0.144143
ENSMUSG00000065315	Gm26064	0	0.960488	0	0	0.883142	0.920043	5.98062	0	0.240122	1.94595	-2.69912	0.144167
ENSMUSG00000046324	Ermp1	1355.29	1499.32	1377.03	1676.07	1191.36	1483.11	1355.61	1204.93	1476.93	1308.75	0.173785	0.144317
ENSMUSG00000088856	Gm24727	0	0.960488	3.3627	1.09547	7.06513	3.68017	1.99354	3.66613	1.35467	4.10124	-1.54005	0.144424
ENSMUSG00000002031	Ift46	371.326	509.058	425.382	451.334	414.193	369.857	346.876	403.274	439.275	383.55	0.196633	0.144734
ENSMUSG00000074240	Cib3	24.2409	17.2888	63.0507	47.1053	28.2605	36.8017	15.9483	17.1086	37.9214	24.5298	0.624387	0.144758
ENSMUSG00000080810	Gm11737	0	3.84195	2.52203	3.28641	0	0.920043	0.99677	0	2.4126	0.479203	2.279	0.144843
ENSMUSG00000043168	4930426D05Rik	0	0	1.68135	5.47736	0	0	0	0	1.78968	0	3.27907	0.144865
ENSMUSG00000050195	Scd4	0	4.80244	0.840676	4.38189	0.883142	0.920043	0	0	2.50625	0.450796	2.35059	0.144909
ENSMUSG00000024065	Ehd3	1401.56	1249.59	1431.67	1486.55	1551.68	1744.4	1240.98	1857.51	1392.35	1598.64	-0.199013	0.144924
ENSMUSG00000052512	Nav2	1077.62	932.634	1234.95	1605.96	1067.72	918.203	1268.89	755.223	1212.79	1002.51	0.273899	0.145275
ENSMUSG00000022844	Pdia5	752.57	730.931	610.331	616.75	678.253	655.99	787.449	1097.39	677.645	804.772	-0.246491	0.145291
ENSMUSG00000079293	Clec7a	285.381	303.514	520.378	300.159	296.736	321.095	311.989	210.191	352.358	285.003	0.306458	0.145342
ENSMUSG00000083139	Gm12418	9.91673	24.0122	23.5389	14.2411	22.0785	18.4009	33.8902	34.2172	17.9272	27.1467	-0.57257	0.145493
ENSMUSG00000036109	Mbnl3	17.6297	11.5259	15.9728	20.814	12.364	10.1205	13.9548	3.66613	16.4856	10.0263	0.688037	0.145576
ENSMUSG00000086479	Gm16014	1.10186	0	1.68135	3.28641	0	0	0	0	1.51741	0	3.04095	0.145584
ENSMUSG00000028148	Them5	1.10186	0	0	1.09547	0.883142	0.920043	2.99031	4.88817	0.549333	2.42042	-2.22023	0.145587
ENSMUSG00000050069	Grem2	121.204	94.1278	91.6337	74.4921	67.1188	111.325	99.677	256.629	95.3645	133.688	-0.480612	0.145598
ENSMUSG00000028851	Nudc	1758.57	1692.38	1606.53	1611.44	2206.09	1839.17	1695.51	1727.97	1667.23	1867.18	-0.164118	0.14568
ENSMUSG00000021120	Pigh	40.7688	50.9058	34.4677	23.0049	35.3257	58.8827	52.8288	54.9919	37.2868	50.5073	-0.431082	0.145745
ENSMUSG00000083011	Gm12816	1.10186	1.92098	0	0	4.41571	4.60021	2.99031	0	0.755709	3.00156	-2.02973	0.145765
ENSMUSG00000091269	Gm6682	3.30558	2.88146	4.20338	6.57283	14.1303	4.60021	4.98385	9.77635	4.24081	8.37267	-0.989811	0.145866
ENSMUSG00000026956	Uap1l1	871.57	776.074	869.259	795.312	699.448	969.725	587.098	513.258	828.054	692.382	0.256661	0.145987
ENSMUSG00000111389	Gm39465	0	0	0.840676	0	0	1.84009	1.99354	3.66613	0.210169	1.87494	-2.61046	0.146056
ENSMUSG00000093967	Gm26180	4.40743	1.92098	3.3627	0	0	0.920043	0	1.22204	2.42278	0.535521	2.2812	0.146085
ENSMUSG00000030004	Nat8	119.001	194.019	261.45	181.848	271.124	158.247	395.718	179.64	189.079	251.183	-0.407999	0.146085
ENSMUSG00000024664	Fads3	410.993	261.253	234.549	558.69	295.852	283.373	279.096	300.623	366.371	289.736	0.336213	0.146284
ENSMUSG00000063445	Nmral1	141.038	136.389	137.871	119.406	148.368	152.727	154.499	169.864	133.676	156.365	-0.22219	0.146447
ENSMUSG00000027244	Atg13	1104.06	1042.13	1027.31	1079.04	1163.98	1142.69	1079.5	1334.47	1063.13	1180.16	-0.150053	0.146455
ENSMUSG00000031355	Arhgap6	77.1301	120.061	94.9964	106.261	122.757	120.526	121.606	114.872	99.6121	119.94	-0.267282	0.146479
ENSMUSG00000086083	Gm15829	7.71301	1.92098	0.840676	0	0	0.920043	0	1.22204	2.61867	0.535521	2.36889	0.146553
ENSMUSG00000005803	Sqor	2385.52	3002.48	3169.35	2744.16	3321.5	3087.66	3259.44	2983.01	2825.38	3162.9	-0.162534	0.146562
ENSMUSG00000050714	Zbtb26	101.371	84.5229	82.3863	81.0649	55.6379	63.4829	77.7481	86.7651	87.3363	70.9085	0.30795	0.146605
ENSMUSG00000000399	Ndufa9	2311.7	2645.18	2571.63	2508.63	2804.86	2579.8	2799.93	2800.92	2509.29	2746.38	-0.129876	0.146879
ENSMUSG00000016458	Wt1	35.2595	34.5776	36.1491	10.9547	15.8965	29.4414	15.9483	15.8866	29.2352	19.2932	0.600023	0.147001
ENSMUSG00000017843	Ppp2r5c	1172.38	1406.15	1158.45	1185.3	1106.58	1131.65	1103.42	1098.62	1230.57	1110.07	0.1487	0.147097
ENSMUSG00000115049	AC113178.1	14.3242	51.8663	35.3084	18.623	11.4808	19.3209	14.9516	31.7731	30.0305	19.3816	0.657799	0.147123
ENSMUSG00000000295	Hddc2	9.91673	12.4863	20.1762	15.3366	24.728	18.4009	27.9096	15.8866	14.479	21.7312	-0.579938	0.147157
ENSMUSG00000043629	1700019D03Rik	11.0186	7.6839	3.3627	5.47736	5.29885	3.68017	0.99677	2.44409	6.88564	3.10497	1.11063	0.147163
ENSMUSG00000035458	Tnni3	0	0.960488	0.840676	3.28641	6.18199	0.920043	5.98062	2.44409	1.27189	3.88169	-1.64049	0.147347
ENSMUSG00000046603	Tcaim	365.817	412.049	354.765	372.46	355.906	375.377	535.266	496.15	376.273	440.675	-0.225831	0.147375
ENSMUSG00000053168	9030619P08Rik	217.066	229.557	248.84	228.954	347.075	258.532	294.047	197.971	231.104	274.406	-0.250751	0.147528
ENSMUSG00000085572	Gm16234	4.40743	0.960488	0.840676	0	0	0	0	0	1.55215	0	3.06901	0.147562
ENSMUSG00000022707	Gbe1	2957.39	3362.67	3458.54	3184.54	2957.64	3125.38	2736.13	2968.34	3240.78	2946.88	0.137401	0.147655
ENSMUSG00000045827	Serpinb9	289.789	319.842	295.918	327.546	264.059	288.893	278.099	257.851	308.274	272.226	0.17787	0.147721
ENSMUSG00000061843	Vmn1r-ps32	4.40743	3.84195	0	0	4.41571	4.60021	4.98385	7.33226	2.06235	5.33301	-1.38742	0.147781
ENSMUSG00000097045	Gm26641	1.10186	2.88146	1.68135	3.28641	0.883142	0.920043	0	0	2.23777	0.450796	2.18518	0.147809
ENSMUSG00000030707	Coro1a	377.938	404.365	708.69	396.561	454.818	397.458	403.692	251.741	471.888	376.927	0.323908	0.147976
ENSMUSG00000038217	Tlcd2	1701.27	2027.59	2826.35	2541.49	2835.77	2239.38	2920.54	2689.72	2274.18	2671.35	-0.231874	0.147983
ENSMUSG00000021070	Bdkrb2	5.50929	1.92098	5.04406	3.28641	6.18199	9.20043	7.97416	7.33226	3.94019	7.67221	-0.960773	0.148042
ENSMUSG00000046688	Tifa	272.159	309.277	291.715	235.526	262.293	239.211	377.776	499.816	277.169	344.774	-0.310425	0.148054
ENSMUSG00000089396	Gm23027	0	0	0	0	1.76628	0	2.99031	1.22204	0	1.49466	-3.03057	0.148093
ENSMUSG00000028399	Ptprd	2245.59	2022.79	1973.07	2265.44	2065.67	2176.82	3030.18	2458.75	2126.72	2432.86	-0.194032	0.148148
ENSMUSG00000057948	Unc13d	56.1948	42.2615	83.2269	58.06	42.3908	40.4819	58.8094	41.5495	59.9358	45.8079	0.393035	0.148171
ENSMUSG00000021365	Nedd9	147.649	130.626	131.145	130.361	101.561	127.886	116.622	111.206	134.945	114.319	0.23781	0.14818
ENSMUSG00000053714	4732471J01Rik	28.6483	15.3678	17.6542	16.4321	35.3257	16.5608	38.874	23.2188	19.5256	28.4948	-0.55554	0.148213
ENSMUSG00000052212	Cd177	5.50929	3.84195	5.88473	4.38189	7.94827	7.36034	14.9516	6.11022	4.90447	9.0926	-0.891222	0.148264
ENSMUSG00000033837	Foxh1	1.10186	1.92098	2.52203	1.09547	0	0.920043	0	0	1.66008	0.230011	2.47228	0.148329
ENSMUSG00000083610	Oaz2-ps	9.91673	16.3283	19.3355	19.7185	8.83142	10.1205	9.9677	13.4425	16.3248	10.5905	0.643707	0.148363
ENSMUSG00000087365	C430049B03Rik	4.40743	2.88146	5.04406	5.47736	0.883142	2.76013	2.99031	0	4.45258	1.6584	1.38476	0.148393
ENSMUSG00000024376	Epb41l4a	12.1204	2.88146	4.20338	7.6683	11.4808	23.0011	6.97739	7.33226	6.7184	12.1979	-0.897423	0.148401
ENSMUSG00000050395	Tnfsf15	6.61115	4.80244	7.56608	1.09547	5.29885	0	0	1.22204	5.01879	1.63022	1.59381	0.148602
ENSMUSG00000058207	Serpina3k	68775.8	70082.9	52961.8	48809.8	57258.5	63410.3	79399.7	164079	60157.6	91036.8	-0.597699	0.14867
ENSMUSG00000022378	Fam49b	155.362	245.885	202.603	176.371	140.42	170.208	185.399	157.644	195.055	163.418	0.258512	0.148674
ENSMUSG00000030468	Siglecg	9.91673	15.3678	16.8135	17.5275	7.94827	7.36034	7.97416	14.6645	14.9064	9.48682	0.681616	0.148679
ENSMUSG00000022332	Khdrbs3	512.364	570.53	633.87	603.605	584.64	496.823	488.417	482.707	580.092	513.147	0.176593	0.148701
ENSMUSG00000027248	Pdia3	5406.82	5672.64	4657.35	5080.8	4791.93	5355.57	5967.66	8351.44	5204.4	6116.65	-0.232776	0.148737
ENSMUSG00000039783	Kmo	6273.98	7209.42	6811.16	7031.83	6530.83	7057.65	7754.87	9982.87	6831.6	7831.56	-0.196827	0.148943
ENSMUSG00000030512	Snrpa1	158.668	180.572	142.074	131.457	128.056	126.966	132.57	133.203	153.193	130.199	0.236002	0.148951
ENSMUSG00000048142	Nat8l	14.3242	10.5654	21.8576	6.57283	11.4808	8.28038	6.97739	3.66613	13.33	7.60119	0.799021	0.148982
ENSMUSG00000024008	Cpne5	2.20372	0.960488	0.840676	2.19094	9.71456	0.920043	3.98708	2.44409	1.54896	4.26644	-1.5121	0.14908
ENSMUSG00000102095	C730036E19Rik	833.005	691.551	654.046	663.856	756.852	634.829	1349.63	750.335	710.615	872.911	-0.297031	0.149124
ENSMUSG00000054556	Gm4876	5.50929	2.88146	2.52203	2.19094	0.883142	2.76013	0	0	3.27593	0.910817	1.76562	0.149231
ENSMUSG00000026750	Psmb7	1506.24	1906.57	1718.34	1674.98	2005.61	1766.48	1751.33	2109.25	1701.53	1908.17	-0.164671	0.149286
ENSMUSG00000089235	Gm23119	11.0186	16.3283	14.2915	16.4321	15.8965	5.52026	5.98062	7.33226	14.5176	8.68242	0.727523	0.149347
ENSMUSG00000026857	Ntmt1	187.316	159.441	159.728	138.029	206.655	204.249	183.406	160.088	161.129	188.6	-0.231455	0.14938
ENSMUSG00000104654	Gm43814	2.20372	0.960488	2.52203	3.28641	0.883142	0	0.99677	0	2.24316	0.469978	2.17063	0.149457
ENSMUSG00000040532	Abhd11	429.725	464.876	539.714	423.947	578.458	480.262	559.188	497.372	464.566	528.82	-0.185585	0.149516
ENSMUSG00000058914	C1qtnf3	6.61115	2.88146	4.20338	5.47736	7.94827	5.52026	9.9677	12.2204	4.79334	8.91417	-0.89553	0.149655
ENSMUSG00000061451	Tmem151a	33.0558	24.9727	23.5389	26.2913	30.0268	20.2409	11.9612	8.5543	26.9647	17.6958	0.579196	0.149746
ENSMUSG00000115829	AC166356.1	1.10186	0	0.840676	0	3.53257	0.920043	0.99677	3.66613	0.485634	2.27888	-2.20428	0.149891
ENSMUSG00000040599	Mis12	279.872	286.225	258.928	304.541	288.787	290.733	310.992	438.714	282.392	332.307	-0.231596	0.149927
ENSMUSG00000018008	Cyth4	369.123	320.803	499.362	423.947	374.452	379.058	350.863	240.743	403.309	336.279	0.26031	0.150044
ENSMUSG00000002455	Prpf6	976.247	926.871	982.75	954.156	1013.85	964.205	1012.72	1406.57	960.006	1099.34	-0.193964	0.150048
ENSMUSG00000025473	Adam8	52.8892	42.2615	69.7761	56.9645	52.1054	38.6418	47.845	30.5511	55.4728	42.2858	0.385783	0.150059
ENSMUSG00000015846	Rxra	13084.6	11099.4	12105.7	12370.1	13603.9	13889.9	12072.9	13959.4	12164.9	13381.5	-0.137543	0.150128
ENSMUSG00000032271	Nnmt	2885.77	3228.2	2085.72	1690.31	2298.82	2886.17	3074.04	6174.98	2472.5	3608.5	-0.545274	0.150161
ENSMUSG00000079884	Gm10698	366.919	355.38	319.457	311.114	430.09	344.096	363.821	400.83	338.218	384.709	-0.18613	0.150208
ENSMUSG00000075705	Msrb1	10518.3	12434.5	12238.6	11075.2	13785	11596.2	12143.7	13866.5	11566.6	12847.8	-0.151435	0.150547
ENSMUSG00000004233	Wars2	79.3338	101.812	98.3591	85.4468	114.808	113.165	102.667	106.318	91.2379	109.24	-0.256856	0.150602
ENSMUSG00000054391	4930517O19Rik	3.30558	3.84195	1.68135	2.19094	0	1.84009	0.99677	0	2.75496	0.709214	1.9072	0.150934
ENSMUSG00000038175	Mylip	655.606	583.016	654.046	602.509	531.651	616.429	531.279	557.252	623.794	559.153	0.157833	0.150993
ENSMUSG00000048031	Fcrl5	2.20372	4.80244	0.840676	7.6683	0.883142	0.920043	2.99031	0	3.87878	1.19837	1.64992	0.151004
ENSMUSG00000084413	Gm12017	3.30558	2.88146	1.68135	1.09547	0	0.920043	0.99677	0	2.24097	0.479203	2.16106	0.151025
ENSMUSG00000065445	Mir143	0	0	0	0	0.883142	0	3.98708	1.22204	0	1.52307	-3.05348	0.151045
ENSMUSG00000069713	4933406P04Rik	6.61115	3.84195	10.0881	8.76377	5.29885	1.84009	0.99677	6.11022	7.32625	3.56148	1.06595	0.151233
ENSMUSG00000075279	Mrpl23-ps1	33.0558	26.8937	24.3796	33.9596	39.7414	23.0011	51.8321	47.6597	29.5722	40.5585	-0.455693	0.151273
ENSMUSG00000041301	Cftr	5.50929	3.84195	8.40676	5.47736	2.64942	3.68017	2.99031	1.22204	5.80884	2.63549	1.12219	0.151284
ENSMUSG00000021565	Slc6a19	7.71301	7.6839	0.840676	7.6683	2.64942	3.68017	2.99031	0	5.97647	2.32998	1.29832	0.151321
ENSMUSG00000037921	Ddx60	131.121	141.192	173.179	182.944	184.577	147.207	179.419	255.407	157.109	191.652	-0.280926	0.151367
ENSMUSG00000022292	Rrm2b	101.371	77.7995	70.6168	83.2558	58.2873	68.0832	70.7707	73.3226	83.2608	67.6159	0.299095	0.151388
ENSMUSG00000033308	Dpyd	8214.36	9829.63	8755.64	8271.91	8883.52	8828.73	10105.3	11760.9	8767.88	9894.61	-0.174207	0.151403
ENSMUSG00000045667	Smtnl2	14.3242	20.1702	23.5389	10.9547	26.4942	42.322	27.9096	9.77635	17.247	26.6255	-0.627844	0.151449
ENSMUSG00000079242	C730034F03Rik	18.7316	23.0517	26.9016	28.4823	18.546	16.5608	13.9548	19.5527	24.2918	17.1536	0.508467	0.151818
ENSMUSG00000093954	Gm16867	17.6297	14.4073	9.24744	9.85924	27.3774	30.3614	6.97739	17.1086	12.7859	20.4562	-0.694106	0.151851
ENSMUSG00000097414	B130046B21Rik	1.10186	1.92098	0.840676	5.47736	0.883142	0	0.99677	0	2.33522	0.469978	2.21486	0.151889
ENSMUSG00000099381	Gm18303	1.10186	0	0	0	0	2.76013	1.99354	2.44409	0.275465	1.79944	-2.56506	0.151904
ENSMUSG00000079502	Cfap77	0	0.960488	1.68135	3.28641	3.53257	1.84009	10.9645	1.22204	1.48206	4.38979	-1.57489	0.15201
ENSMUSG00000076562	Igkv4-50	3.30558	0	0	0	3.53257	1.84009	1.99354	4.88817	0.826394	3.06359	-1.96369	0.152025
ENSMUSG00000050199	Lgr4	816.477	689.63	639.754	666.047	755.969	802.277	695.746	964.192	702.977	804.546	-0.194159	0.152044
ENSMUSG00000022315	Slc30a8	3.30558	6.72341	2.52203	3.28641	1.76628	0.920043	1.99354	1.22204	3.95936	1.47548	1.41804	0.152054
ENSMUSG00000009097	Tbx1	13.2223	10.5654	23.5389	6.57283	9.71456	4.60021	9.9677	7.33226	13.4749	7.90368	0.784918	0.152162
ENSMUSG00000033684	Qsox1	8548.22	8216.01	7244.95	7805.23	7677.15	9519.68	8165.54	10552.3	7953.6	8978.68	-0.17481	0.152163
ENSMUSG00000114469	AC152162.1	34.1576	58.5897	42.8745	46.0098	26.4942	28.5213	39.8708	42.7715	45.4079	34.4145	0.414127	0.152166
ENSMUSG00000028413	B4galt1	771.301	642.566	766.697	686.861	623.498	837.239	946.932	909.2	716.856	829.217	-0.208934	0.152168
ENSMUSG00000086446	Prkag2os1	6.61115	2.88146	1.68135	5.47736	0.883142	1.84009	2.99031	0	4.16283	1.42838	1.48717	0.152189
ENSMUSG00000053226	Dand5	67.2134	78.76	72.2981	58.06	104.211	80.0437	89.7093	67.2124	69.0829	85.294	-0.3071	0.152277
ENSMUSG00000025612	Bach1	1035.75	850.992	894.479	771.212	887.557	836.319	1078.51	1396.8	888.108	1049.79	-0.240003	0.152338
ENSMUSG00000030811	Fbxl19	307.419	192.098	262.291	330.832	269.358	225.41	208.325	205.303	273.16	227.099	0.262279	0.15235
ENSMUSG00000032725	Folr2	117.899	123.903	107.607	108.452	90.9636	97.5245	90.7061	107.54	114.465	96.6835	0.246812	0.15238
ENSMUSG00000005220	Corin	58.3985	55.7083	57.166	74.4921	37.9751	69.9232	49.8385	21.9968	61.4412	44.9334	0.437871	0.152395
ENSMUSG00000028076	Cd1d1	5248.15	5717.78	5879.69	6508.2	6836.4	6138.52	7868.5	5617.73	5838.46	6615.29	-0.180334	0.152409
ENSMUSG00000059159	Gm8129	8.81487	28.8146	13.4508	23.0049	27.3774	29.4414	21.9289	30.5511	18.5213	27.3247	-0.558552	0.15243
ENSMUSG00000039509	Nup133	177.399	202.663	212.691	201.567	173.096	184.009	167.457	166.198	198.58	172.69	0.20221	0.152448
ENSMUSG00000087943	Gm24245	2.20372	0	1.68135	3.28641	0	0	0	1.22204	1.79287	0.305511	2.55423	0.152521
ENSMUSG00000084941	Gm11944	8.81487	2.88146	2.52203	4.38189	0.883142	1.84009	3.98708	0	4.65006	1.67758	1.42494	0.152534
ENSMUSG00000045498	Pcdhb3	2.20372	2.88146	0	2.19094	0	0.920043	0	0	1.81903	0.230011	2.57285	0.15254
ENSMUSG00000066116	Gm10154	78.232	62.4317	77.3422	49.2962	106.86	69.9232	87.7158	72.1006	66.8255	84.1499	-0.333582	0.152542
ENSMUSG00000052572	Dlg2	9.91673	0.960488	2.52203	1.09547	0	2.76013	0.99677	0	3.62368	0.939225	1.89111	0.152603
ENSMUSG00000032068	Plet1	40.7688	48.0244	49.5999	35.0551	29.1437	35.8817	42.8611	21.9968	43.362	32.4708	0.414616	0.152624
ENSMUSG00000037780	Mbl1	3395.93	3990.83	3348.41	4016	3840.78	3717.89	3953.19	5467.42	3687.79	4244.82	-0.202632	0.152649
ENSMUSG00000026259	Ngef	595.004	588.779	959.211	644.137	1114.52	761.795	969.858	580.471	696.783	856.662	-0.298067	0.152684
ENSMUSG00000112545	1300014J16Rik	29.7502	46.1034	30.2643	29.5777	47.6896	23.9211	61.7998	54.9919	33.9239	47.1006	-0.465646	0.152691
ENSMUSG00000028525	Pde4b	273.261	235.319	247.159	261.818	243.747	198.729	253.18	173.53	254.389	217.297	0.222702	0.152752
ENSMUSG00000020911	Krt19	45.1762	51.8663	84.0676	26.2913	25.6111	35.8817	43.8579	43.9936	51.8504	37.3361	0.490414	0.15287
ENSMUSG00000019952	Poc1b	116.797	123.903	114.332	139.125	117.458	90.1642	103.664	103.874	123.539	103.79	0.248797	0.153042
ENSMUSG00000104910	Gm43331	3.30558	0.960488	5.04406	2.19094	0	0	1.99354	1.22204	2.87527	0.803896	1.91573	0.153057
ENSMUSG00000028392	Bspry	4.40743	13.4468	7.56608	3.28641	2.64942	4.60021	4.98385	1.22204	7.17669	3.36388	1.08473	0.153084
ENSMUSG00000105655	Gm42659	2.20372	8.64439	3.3627	17.5275	3.53257	0.920043	4.98385	4.88817	7.93459	3.58116	1.15644	0.153165
ENSMUSG00000050423	Ppp1r3g	56.1948	20.1702	34.4677	36.1506	37.9751	12.8806	16.9451	30.5511	36.7458	24.588	0.576676	0.153195
ENSMUSG00000062169	Cnih4	325.048	347.697	257.247	282.632	281.722	243.811	217.296	296.957	303.156	259.946	0.222363	0.153226
ENSMUSG00000036916	Zfp280c	53.9911	83.5624	65.5727	67.9192	64.4693	80.0437	106.654	90.4312	67.7614	85.3997	-0.327337	0.153245
ENSMUSG00000033033	Calhm2	59.5004	88.3649	97.5184	78.874	60.0536	75.4435	66.7836	58.6581	81.0644	65.2347	0.317077	0.153266
ENSMUSG00000028100	Nudt17	4.40743	5.76293	8.40676	2.19094	8.83142	6.4403	13.9548	9.77635	5.19202	9.75071	-0.875059	0.153271
ENSMUSG00000094786	Gm14403	169.686	188.256	226.142	151.175	183.693	154.567	273.115	310.399	183.815	230.444	-0.31949	0.153325
ENSMUSG00000021196	Pfkp	158.668	130.626	168.135	121.597	132.471	115.005	115.625	125.87	144.757	122.243	0.246493	0.153453
ENSMUSG00000081453	Gm6767	2.20372	3.84195	5.88473	1.09547	1.76628	0	1.99354	0	3.25647	0.939956	1.7704	0.153485
ENSMUSG00000114525	AC124549.1	2.20372	5.76293	5.88473	4.38189	4.41571	9.20043	12.958	8.5543	4.55832	8.78211	-0.920605	0.153618
ENSMUSG00000010376	Nedd8	1574.56	1717.35	1725.07	1561.05	2125.72	1756.36	1718.43	1721.86	1644.51	1830.59	-0.154794	0.153691
ENSMUSG00000026494	Kif26b	23.139	9.60488	39.5118	31.7687	38.8582	27.6013	47.845	37.8833	26.0061	38.047	-0.542757	0.153728
ENSMUSG00000029070	Mxra8	299.706	275.66	367.375	289.204	279.073	294.414	257.167	237.076	307.986	266.932	0.206011	0.153819
ENSMUSG00000038780	Smurf1	485.92	473.52	554.846	621.132	482.195	523.504	435.589	428.937	533.855	467.556	0.189732	0.153832
ENSMUSG00000049152	Ugt3a2	7759.29	8070.02	6669.92	7896.16	7781.36	7493.75	8910.13	10123.4	7598.85	8577.16	-0.174618	0.153859
ENSMUSG00000099810	Gm29509	0	0.960488	0	1.09547	3.53257	1.84009	3.98708	0	0.51399	2.33993	-2.24192	0.153896
ENSMUSG00000114424	CT009536.1	1.10186	3.84195	0	1.09547	0	0	0	0	1.50982	0	3.03755	0.154021
ENSMUSG00000042901	Aida	246.816	285.265	225.301	259.627	192.525	248.412	232.247	205.303	254.252	219.622	0.209575	0.154058
ENSMUSG00000036819	Jmjd4	168.584	191.137	186.63	198.28	216.37	192.289	231.251	216.302	186.158	214.053	-0.200149	0.154063
ENSMUSG00000097426	Gm8941	752.57	575.332	706.168	714.247	708.28	636.67	1247.96	740.558	687.079	833.366	-0.278571	0.154076
ENSMUSG00000019194	Scn1b	192.825	192.098	271.538	167.607	175.745	215.29	160.48	118.538	206.017	167.513	0.296931	0.154123
ENSMUSG00000021532	Fastkd3	102.473	122.942	116.854	111.738	116.575	129.726	147.522	144.201	113.502	134.506	-0.239319	0.154217
ENSMUSG00000030359	Pzp	55885.2	56562.2	48179.1	61073.6	48401.5	62298.8	66914.2	78251.1	55425	63966.4	-0.206764	0.154295
ENSMUSG00000023994	Nfya	283.178	299.672	300.121	279.345	263.176	330.295	357.841	397.164	290.579	337.119	-0.210158	0.154353
ENSMUSG00000037902	Sirpa	741.551	800.086	1055.89	776.689	735.657	801.357	802.4	537.699	843.554	719.278	0.229579	0.154384
ENSMUSG00000044694	2010007H06Rik	3.30558	5.76293	5.88473	3.28641	0.883142	0.920043	4.98385	0	4.55991	1.69676	1.41782	0.154554
ENSMUSG00000025980	Hspd1	7736.15	8669.36	7132.3	6955.15	7778.71	7793.68	8536.34	10436.2	7623.24	8636.25	-0.179815	0.154793
ENSMUSG00000039347	Atp6v0e2	31.9539	34.5776	33.627	35.0551	35.3257	19.3209	20.9322	23.2188	33.8034	24.6994	0.44619	0.154799
ENSMUSG00000097566	A930024N18Rik	4.40743	2.88146	0	3.28641	4.41571	5.52026	11.9612	2.44409	2.64383	6.08532	-1.25311	0.154843
ENSMUSG00000040649	Rimklb	0	0	0.840676	0	1.76628	0	2.99031	2.44409	0.210169	1.80017	-2.56546	0.154918
ENSMUSG00000040616	Tmem51	235.798	231.478	295.918	207.044	219.902	253.012	188.39	139.313	242.559	200.154	0.274474	0.15497
ENSMUSG00000039633	Lonrf1	240.205	186.335	342.996	281.536	272.008	329.375	402.695	274.96	262.768	319.759	-0.282257	0.155107
ENSMUSG00000034438	Gbp8	66.1115	47.0639	72.2981	51.4872	40.6245	47.8422	53.8256	43.9936	59.2402	46.5715	0.350477	0.155286
ENSMUSG00000041632	Mrps27	372.428	381.314	374.942	380.129	438.038	400.219	390.734	460.71	377.203	422.425	-0.162013	0.155298
ENSMUSG00000026548	Slamf9	35.2595	50.9058	51.2812	37.246	34.4425	33.1215	40.8676	23.2188	43.6732	32.9126	0.406694	0.155304
ENSMUSG00000021497	Txndc15	1892.99	1769.22	1673.79	1759.33	1947.33	1910.01	1769.27	2254.67	1773.83	1970.32	-0.151238	0.155346
ENSMUSG00000038028	Tigar	255.631	219.952	216.894	212.521	263.176	271.413	245.205	249.297	226.25	257.273	-0.187956	0.155401
ENSMUSG00000024301	Kifc5b	14.3242	9.60488	7.56608	10.9547	16.7797	16.5608	18.9386	12.2204	10.6125	16.1249	-0.626258	0.155457
ENSMUSG00000015711	Prune1	548.726	604.147	532.989	555.404	545.782	518.904	510.346	394.72	560.316	492.438	0.183501	0.155482
ENSMUSG00000109231	Gm45737	3.30558	1.92098	0.840676	3.28641	9.71456	0.920043	7.97416	3.66613	2.33841	5.56872	-1.29427	0.155548
ENSMUSG00000049950	Rpp38	37.4632	57.6293	51.2812	47.1053	60.0536	40.4819	69.7739	84.321	48.3697	63.6576	-0.383007	0.155557
ENSMUSG00000002108	Nr1h3	3525.95	3660.42	3989.85	3685.17	4699.2	4152.15	3650.17	3988.75	3715.35	4122.57	-0.150086	0.155582
ENSMUSG00000078886	Gm2026	0	0	0	20.814	0	0	0	0	5.20349	0	4.82321	0.155791
ENSMUSG00000113237	Gm6109	1.10186	0	2.52203	2.19094	0	0	0	0	1.45371	0	2.99007	0.15596
ENSMUSG00000087206	Gm16175	1.10186	0	2.52203	2.19094	0	0	0	0	1.45371	0	2.99007	0.15596
ENSMUSG00000056258	Kcnq3	1.10186	0	2.52203	2.19094	0	0	0	0	1.45371	0	2.99007	0.15596
ENSMUSG00000050994	Adgb	62.8059	62.4317	44.5558	35.0551	24.728	34.0416	30.8999	61.1022	51.2121	37.6929	0.458655	0.155982
ENSMUSG00000056737	Capg	220.372	301.593	420.338	228.954	253.462	290.733	239.225	140.535	292.814	230.989	0.341496	0.156072
ENSMUSG00000083411	Rpl30-ps10	113.491	253.569	195.037	151.175	53.8716	46.0021	56.8159	233.41	178.318	97.525	0.875142	0.156089
ENSMUSG00000108389	Gm45206	0	0.960488	0	1.09547	1.76628	2.76013	2.99031	1.22204	0.51399	2.18469	-2.13224	0.15611
ENSMUSG00000082394	Gm4596	11.0186	11.5259	13.4508	16.4321	7.94827	8.28038	7.97416	8.5543	13.1068	8.18928	0.679498	0.156159
ENSMUSG00000084195	Gm15372	11.0186	6.72341	4.20338	12.0502	4.41571	5.52026	4.98385	2.44409	8.49889	4.34098	0.930299	0.156182
ENSMUSG00000029313	Aff1	691.967	540.755	620.419	724.107	622.615	739.714	743.591	843.21	644.312	737.282	-0.194083	0.156296
ENSMUSG00000111977	AC132265.1	11.0186	7.6839	9.24744	5.47736	0.883142	11.0405	1.99354	1.22204	8.35682	3.78481	1.11599	0.156395
ENSMUSG00000073423	Zfp414	60.6022	71.0761	94.1557	60.2509	125.406	96.6045	78.7449	64.7683	71.5212	91.3809	-0.354271	0.156694
ENSMUSG00000091580	Gm6467	52.8892	61.4712	68.9354	63.5374	88.3142	82.8038	70.7707	62.3242	61.7083	76.0532	-0.304665	0.156972
ENSMUSG00000074785	Plxnc1	509.059	424.536	534.67	531.304	529.885	576.867	551.214	589.025	499.892	561.748	-0.167708	0.157033
ENSMUSG00000028874	Fgr	127.816	151.757	144.596	111.738	112.159	123.286	123.6	87.9871	133.977	111.758	0.259654	0.157162
ENSMUSG00000112593	AC153366.1	8.81487	11.5259	6.72541	1.09547	13.2471	7.36034	10.9645	19.5527	7.0404	12.7812	-0.837249	0.157314
ENSMUSG00000027709	Mccc1	1333.25	1351.41	1324.06	1310.18	1479.26	1369.02	1452.29	1484.78	1329.73	1446.34	-0.120974	0.157374
ENSMUSG00000078776	9530053A07Rik	1.10186	2.88146	0	3.28641	0	0	0.99677	0	1.81743	0.249193	2.57237	0.157428
ENSMUSG00000061393	Acvr2b	62.8059	57.6293	89.1117	71.2057	78.5996	75.4435	113.632	84.321	70.1881	87.999	-0.320287	0.157629
ENSMUSG00000112806	AC122539.3	6.61115	2.88146	0	1.09547	0	1.84009	0	0	2.64702	0.460021	2.4068	0.157637
ENSMUSG00000031647	Mfap3l	26.4446	21.1307	12.6101	24.1004	12.364	18.4009	14.9516	9.77635	21.0715	13.8732	0.579863	0.157653
ENSMUSG00000045896	Paip2b	448.456	458.153	385.03	394.37	432.739	437.02	504.366	541.365	421.502	478.873	-0.182477	0.157799
ENSMUSG00000022219	Cideb	1177.89	1246.71	1087.83	1289.37	1346.79	1166.61	1416.41	1417.57	1200.45	1336.85	-0.155217	0.157841
ENSMUSG00000063011	Msln	96.9636	125.824	94.1557	43.8189	102.444	53.3625	20.9322	23.2188	90.1905	49.9895	0.847089	0.157936
ENSMUSG00000000049	Apoh	38123.2	37750	31696	37293.1	36818.2	35935.9	43453.2	46271.4	36215.6	40619.7	-0.165554	0.157996
ENSMUSG00000028445	Enho	117.899	102.772	185.789	169.798	158.082	146.287	197.361	212.636	144.065	178.591	-0.304721	0.158043
ENSMUSG00000083246	Gm11839	6.61115	0.960488	0.840676	3.28641	3.53257	3.68017	7.97416	10.9984	2.92468	6.54632	-1.18674	0.158093
ENSMUSG00000045165	AI467606	34.1576	23.0517	51.2812	13.1457	12.364	28.5213	23.9225	14.6645	30.4091	19.8681	0.619372	0.158112
ENSMUSG00000025089	Gfra1	3551.29	2754.68	2541.36	2150.41	2869.33	3128.15	2682.31	4483.68	2749.44	3290.86	-0.259077	0.158134
ENSMUSG00000107482	Gm45233	0	0	0	0	1.76628	1.84009	1.99354	0	0	1.39998	-2.95652	0.158193
ENSMUSG00000103391	Gm38302	2.20372	1.92098	0	9.85924	0	0	2.99031	0	3.49598	0.747578	2.20654	0.158336
ENSMUSG00000114784	CT009713.9	1.10186	0	0	1.09547	1.76628	2.76013	2.99031	1.22204	0.549333	2.18469	-2.11955	0.158408
ENSMUSG00000049134	Nrap	0	5.76293	5.04406	3.28641	9.71456	10.1205	3.98708	6.11022	3.52335	7.48308	-1.06456	0.158421
ENSMUSG00000039768	Dnajc11	1413.68	1186.2	1338.36	1396.73	1495.16	1495.99	1366.57	1527.55	1333.74	1471.32	-0.141893	0.15845
ENSMUSG00000026638	Irf6	384.549	434.14	325.342	364.792	336.477	414.939	418.644	652.571	377.206	455.658	-0.269989	0.158479
ENSMUSG00000040936	Ulk4	4.40743	10.5654	7.56608	7.6683	5.29885	4.60021	3.98708	1.22204	7.5518	3.77705	0.970258	0.158501
ENSMUSG00000020672	Sntg2	84.8431	91.2463	84.0676	93.1151	93.613	98.4446	93.6964	147.867	88.318	108.405	-0.287729	0.158505
ENSMUSG00000028468	Rgp1	1183.4	1080.55	1165.18	1263.08	1401.55	1267.82	1258.92	1237.93	1173.05	1291.55	-0.139765	0.158539
ENSMUSG00000084638	Gm23889	3.30558	4.80244	1.68135	1.09547	0	0.920043	0.99677	1.22204	2.72121	0.784714	1.84395	0.158577
ENSMUSG00000112465	Gm18387	2.20372	0	0	0	0	3.68017	0.99677	6.11022	0.550929	2.69679	-2.37438	0.158769
ENSMUSG00000026070	Il18r1	18.7316	5.76293	15.9728	8.76377	3.53257	9.20043	11.9612	1.22204	12.3078	6.47907	0.907212	0.15887
ENSMUSG00000034210	Efcab14	426.419	396.681	423.701	427.234	324.996	398.378	357.841	406.94	418.509	372.039	0.171557	0.158873
ENSMUSG00000094974	Rps19-ps2	0	0.960488	2.52203	2.19094	5.29885	6.4403	2.99031	1.22204	1.41836	3.98788	-1.48353	0.158935
ENSMUSG00000031093	Dock11	37.4632	37.459	46.2372	43.8189	28.2605	26.6812	23.9225	46.4376	41.2446	31.3255	0.41558	0.159002
ENSMUSG00000022864	D16Ertd472e	106.88	98.9302	120.217	94.2106	118.341	124.206	150.512	108.762	105.059	125.455	-0.254779	0.159022
ENSMUSG00000052783	Grk4	53.9911	32.6566	22.6983	41.6279	21.1954	29.4414	29.9031	28.107	37.7435	27.1617	0.465908	0.159099
ENSMUSG00000020262	Adarb1	392.262	332.329	379.145	369.174	438.921	414.019	430.605	370.279	368.227	413.456	-0.169432	0.159128
ENSMUSG00000029661	Col1a2	815.375	777.995	1084.47	769.021	743.605	822.518	830.31	529.145	861.716	731.394	0.236062	0.159129
ENSMUSG00000031101	Sash3	71.6208	81.6415	116.854	93.1151	90.0804	70.8433	74.7578	53.7699	90.8078	72.3629	0.324784	0.159141
ENSMUSG00000026193	Fn1	29430.6	23924.8	23683.5	27433.9	27065.6	27867.2	28024.2	34313.8	26118.2	29317.7	-0.166706	0.159164
ENSMUSG00000088151	Gm26347	0	0	0	0	0.883142	0.920043	0.99677	2.44409	0	1.31101	-2.82124	0.159176
ENSMUSG00000064918	Gm22571	0	0	0	0	0.883142	0.920043	0.99677	2.44409	0	1.31101	-2.82124	0.159176
ENSMUSG00000109003	Gm36011	0	0	0	0	0.883142	0.920043	0.99677	2.44409	0	1.31101	-2.82124	0.159176
ENSMUSG00000104453	Gm37829	19.8335	12.4863	12.6101	28.4823	13.2471	1.84009	13.9548	14.6645	18.353	10.9266	0.751393	0.159224
ENSMUSG00000058318	Phf21a	299.706	266.055	226.983	268.391	219.902	187.689	248.196	257.851	265.283	228.409	0.216797	0.15937
ENSMUSG00000101268	2010310C07Rik	3.30558	2.88146	0	3.28641	0.883142	0	0.99677	0	2.36836	0.469978	2.23263	0.159448
ENSMUSG00000003573	Homer3	73.8245	51.8663	90.793	72.3011	81.249	51.5224	51.8321	32.9952	72.1963	54.3997	0.398851	0.1595
ENSMUSG00000019710	Mrpl24	1051.17	1247.67	1086.99	996.879	1364.45	1116.01	1156.25	1274.59	1095.68	1227.83	-0.163795	0.159557
ENSMUSG00000010142	Tnfrsf13b	15.426	13.4468	25.2203	13.1457	10.5977	9.20043	15.9483	7.33226	16.8097	10.7697	0.646248	0.159603
ENSMUSG00000091575	2010016I18Rik	16.5279	16.3283	23.5389	20.814	10.5977	8.28038	21.9289	9.77635	19.3023	12.6458	0.614178	0.159604
ENSMUSG00000030823	9130019O22Rik	53.9911	36.4985	45.3965	55.869	27.3774	37.7217	45.8514	35.4393	47.9388	36.5975	0.387145	0.15964
ENSMUSG00000028621	Cyb5rl	226.983	262.213	334.589	248.672	369.153	302.694	297.038	284.736	268.114	313.405	-0.223623	0.159724
ENSMUSG00000112800	Gm40604	2.20372	0	1.68135	1.09547	1.76628	3.68017	2.99031	6.11022	1.24514	3.63675	-1.53159	0.159733
ENSMUSG00000104900	4930596I21Rik	4.40743	3.84195	0	3.28641	0.883142	0.920043	0	1.22204	2.88395	0.756307	1.92772	0.159736
ENSMUSG00000038768	9130409I23Rik	179.603	304.475	393.436	358.219	276.423	264.052	251.186	215.08	308.933	251.685	0.296053	0.15987
ENSMUSG00000022414	Tab1	115.695	130.626	158.047	112.834	135.121	115.005	99.677	61.1022	129.301	102.726	0.326345	0.159889
ENSMUSG00000011427	Zfp790	139.936	121.982	127.783	130.361	127.172	146.287	167.457	171.086	130.015	153.001	-0.231731	0.159961
ENSMUSG00000071369	Map3k5	1006	859.636	1054.21	828.177	1035.93	1190.54	928.99	1082.73	937.004	1059.55	-0.17685	0.160034
ENSMUSG00000074971	Fibin	4.40743	9.60488	7.56608	14.2411	18.546	13.8006	13.9548	10.9984	8.95488	14.3249	-0.691759	0.160096
ENSMUSG00000041773	Enc1	476.003	440.864	419.497	479.817	392.115	489.463	361.828	333.618	454.045	394.256	0.20033	0.160109
ENSMUSG00000042682	Selenok	1435.72	1523.33	1334.15	1397.82	1436.87	1449.07	1543	2054.25	1422.76	1620.8	-0.187051	0.160255
ENSMUSG00000011179	Odc1	1251.71	1528.14	1517.42	1242.26	1669.14	1440.79	1549.98	1531.22	1384.88	1547.78	-0.159736	0.160293
ENSMUSG00000040557	Mettl27	345.984	434.14	380.826	478.721	380.634	387.338	327.937	332.396	409.918	357.076	0.197118	0.160353
ENSMUSG00000031562	Dctd	0	0.960488	0.840676	3.28641	2.64942	6.4403	2.99031	2.44409	1.27189	3.63103	-1.54751	0.160383
ENSMUSG00000028322	Exosc3	330.558	299.672	309.369	255.245	333.828	323.855	313.983	398.386	298.711	342.513	-0.194353	0.160431
ENSMUSG00000026546	Cfap45	1.10186	1.92098	2.52203	2.19094	5.29885	4.60021	5.98062	2.44409	1.93395	4.58094	-1.24229	0.160442
ENSMUSG00000021198	Unc79	16.5279	16.3283	10.9288	12.0502	34.4425	6.4403	19.9354	28.107	13.9588	22.2313	-0.67151	0.160511
ENSMUSG00000004040	Stat3	2625.73	2783.49	2255.53	2115.36	2279.39	2626.72	2502.89	4330.92	2445.03	2934.98	-0.262995	0.160528
ENSMUSG00000031530	Dusp4	100.269	60.5107	68.9354	93.1151	113.925	124.206	58.8094	117.316	80.7076	103.564	-0.364563	0.160557
ENSMUSG00000078995	Zfp456	8.81487	11.5259	15.1322	3.28641	2.64942	9.20043	4.98385	3.66613	9.68983	5.12496	0.926113	0.160689
ENSMUSG00000103343	Gm37052	1.10186	0.960488	3.3627	1.09547	0.883142	0	0	0	1.63013	0.220785	2.4516	0.160694
ENSMUSG00000045404	Kcnk13	63.9078	41.301	41.1931	49.2962	39.7414	40.4819	23.9225	43.9936	48.9245	37.0348	0.398156	0.160722
ENSMUSG00000000171	Sdhd	4758.93	4991.65	4970.08	4575.78	5811.96	5431.93	5178.22	4754.97	4824.11	5294.27	-0.134341	0.160758
ENSMUSG00000097121	D130020L05Rik	312.928	270.858	404.365	360.41	461.883	375.377	346.876	387.388	337.14	392.881	-0.220389	0.160847
ENSMUSG00000094796	BC147527	11.0186	5.76293	15.1322	9.85924	4.41571	9.20043	6.97739	2.44409	10.4432	5.7594	0.84302	0.160877
ENSMUSG00000022136	Dnajc3	4245.46	4059.02	3165.99	3865.92	3567.89	3667.29	4690.8	6259.31	3834.1	4546.32	-0.245598	0.161041
ENSMUSG00000029484	Anxa3	163.075	177.69	174.02	157.748	120.107	177.568	142.538	130.759	168.133	142.743	0.235855	0.161166
ENSMUSG00000080928	Hmgb1-ps6	0	0	0	0	0	0.920043	5.98062	0	0	1.72517	-3.24184	0.161209
ENSMUSG00000017314	Mpp2	20.9353	12.4863	13.4508	19.7185	7.06513	11.9606	14.9516	8.5543	16.6477	10.6329	0.634989	0.16128
ENSMUSG00000092416	Zfp141	82.6394	71.0761	64.7321	75.5875	69.7682	81.8838	92.6996	120.982	73.5088	91.3335	-0.307656	0.161418
ENSMUSG00000085684	4930469K13Rik	0	1.92098	5.04406	2.19094	0.883142	0.920043	0	0	2.28899	0.450796	2.2493	0.161562
ENSMUSG00000019066	Rab3d	526.688	498.493	532.989	551.022	559.912	498.663	409.673	345.838	527.298	453.521	0.214264	0.161675
ENSMUSG00000085995	Gm2788	542.114	617.594	531.307	525.826	532.534	552.946	676.807	804.104	554.21	641.598	-0.2088	0.161695
ENSMUSG00000041548	Hspb8	5172.12	4584.41	4663.23	4051.05	4566.73	5353.73	4048.88	8250.01	4617.7	5554.84	-0.266321	0.161731
ENSMUSG00000062753	AI413582	240.205	236.28	212.691	207.044	181.044	228.171	189.386	177.196	224.055	193.949	0.205521	0.161817
ENSMUSG00000042807	Hecw2	121.204	65.3132	75.6608	102.974	69.7682	155.487	95.69	158.866	91.2882	119.953	-0.394379	0.161901
ENSMUSG00000086328	2700033N17Rik	16.5279	16.3283	3.3627	8.76377	7.94827	4.60021	6.97739	4.88817	11.2457	6.10351	0.860881	0.162019
ENSMUSG00000026942	Traf2	300.807	269.897	317.776	324.26	274.657	297.174	230.254	259.073	303.185	265.289	0.191097	0.162054
ENSMUSG00000036834	Plch1	1.10186	1.92098	0	0	0	5.52026	0.99677	6.11022	0.755709	3.15681	-2.05537	0.162224
ENSMUSG00000078173	Lenep	1.10186	2.88146	1.68135	0	0	0	0	0	1.41617	0	2.96127	0.162284
ENSMUSG00000076522	Igkv16-104	0	0	0.840676	0	1.76628	2.76013	0	2.44409	0.210169	1.74262	-2.52854	0.162405
ENSMUSG00000087750	Gm23468	1.10186	0	0	0	0	3.68017	0.99677	2.44409	0.275465	1.78026	-2.55338	0.162433
ENSMUSG00000039753	Fbxl5	498.04	592.621	558.209	518.158	441.571	472.902	506.359	519.368	541.757	485.05	0.162175	0.16248
ENSMUSG00000103049	Gm37311	0	0	0	0	0.883142	0	5.98062	0	0	1.71594	-3.23495	0.162584
ENSMUSG00000094613	A630076J17Rik	0	3.84195	2.52203	1.09547	0.883142	4.60021	9.9677	4.88817	1.86486	5.08481	-1.3995	0.162644
ENSMUSG00000097675	1700101I11Rik	1.10186	0	1.68135	2.19094	4.41571	5.52026	2.99031	1.22204	1.24354	3.53708	-1.53883	0.162806
ENSMUSG00000054342	Kcnn4	53.9911	33.6171	60.5287	26.2913	26.4942	40.4819	36.8805	21.9968	43.607	31.4634	0.469446	0.162896
ENSMUSG00000060143	Gm10076	182.909	416.852	465.735	191.708	353.257	359.737	428.611	796.772	314.301	484.594	-0.622859	0.163028
ENSMUSG00000030340	Scnn1a	352.595	295.83	247.159	289.204	340.01	264.972	354.85	443.602	296.197	350.858	-0.24327	0.163161
ENSMUSG00000005897	Nr2c1	228.085	244.924	234.549	211.426	234.916	257.612	292.054	263.961	229.746	262.136	-0.187811	0.163183
ENSMUSG00000091102	5830462I19Rik	8.81487	2.88146	0.840676	4.38189	1.76628	0.920043	2.99031	0	4.22972	1.41916	1.51413	0.163194
ENSMUSG00000108367	Gm4881	0	0	0	0	0.883142	0.920043	3.98708	0	0	1.44757	-2.99491	0.163313
ENSMUSG00000066477	Gm16551	23.139	21.1307	50.4406	21.9094	20.3123	39.5618	47.845	65.9903	29.1549	43.4274	-0.552397	0.163314
ENSMUSG00000044330	Gm9790	11.0186	11.5259	4.20338	8.76377	14.1303	12.8806	8.97093	21.9968	8.8779	14.4946	-0.709008	0.16336
ENSMUSG00000086997	Gm12981	5.50929	0	0.840676	1.09547	0	0	0.99677	0	1.86136	0.249193	2.59969	0.163478
ENSMUSG00000086560	Gm13372	2.20372	0.960488	0	0	1.76628	3.68017	2.99031	2.44409	0.791051	2.72021	-1.83833	0.16367
ENSMUSG00000016087	Fli1	103.575	101.812	90.793	88.7332	91.8467	80.0437	88.7126	48.8817	96.2282	77.3712	0.303941	0.163846
ENSMUSG00000037254	Itih2	11785.5	11426.9	11306.3	13446.9	11501.2	12403.1	16174.6	14066.9	11991.4	13536.4	-0.174834	0.163849
ENSMUSG00000113205	AC130829.2	0	0.960488	0	0	0	3.68017	0.99677	2.44409	0.240122	1.78026	-2.55347	0.164123
ENSMUSG00000066154	Mup3	40811.7	68813.2	60533.7	51815.8	63755.8	52681.6	65987.2	156809	55493.6	84808.4	-0.611879	0.164179
ENSMUSG00000079773	AC087559.2	0	0	0	0	0	4.60021	1.99354	0	0	1.64844	-3.1851	0.164193
ENSMUSG00000108199	Gm44249	4.40743	0	1.68135	1.09547	0.883142	0	0	0	1.79606	0.220785	2.55713	0.164208
ENSMUSG00000028415	Spink4	0	19.2098	19.3355	0	0.883142	0	3.98708	1.22204	9.63633	1.52307	2.67124	0.164225
ENSMUSG00000033538	Casp4	45.1762	55.7083	42.8745	54.7736	23.8448	36.8017	47.845	43.9936	49.6331	38.1213	0.38854	0.164292
ENSMUSG00000078866	Zfp970	256.733	226.675	236.23	323.164	196.941	254.852	401.698	458.266	260.701	327.939	-0.328967	0.164302
ENSMUSG00000018593	Sparc	1912.83	2503.99	2912.1	2273.1	2267.91	2253.18	2123.12	1675.42	2400.51	2079.91	0.206762	0.164317
ENSMUSG00000105189	Gm7774	11.0186	11.5259	12.6101	7.6683	12.364	23.0011	19.9354	10.9984	10.7057	16.5747	-0.630259	0.164427
ENSMUSG00000028970	Abcb1b	26.4446	30.7356	32.7864	23.0049	20.3123	23.0011	18.9386	20.7747	28.2429	20.7567	0.450604	0.164434
ENSMUSG00000027134	Lpcat4	40.7688	17.2888	50.4406	50.3917	35.3257	20.2409	29.9031	26.885	39.7225	28.0887	0.497782	0.164497
ENSMUSG00000042035	Igsf3	15.426	25.9332	17.6542	19.7185	29.1437	31.2815	21.9289	26.885	19.683	27.3098	-0.472861	0.164509
ENSMUSG00000050623	Catsperz	3.30558	6.72341	5.04406	3.28641	1.76628	1.84009	2.99031	1.22204	4.58987	1.95468	1.23099	0.164512
ENSMUSG00000035031	C8a	5810.1	6948.17	4891.05	6561.87	5156.66	7189.21	7442.88	13187.1	6052.8	8243.96	-0.445669	0.164532
ENSMUSG00000022742	Cpox	8354.29	7616.67	7598.03	7799.76	9498.19	8060.49	7743.91	9303.42	7842.19	8651.5	-0.141705	0.164693
ENSMUSG00000023982	Guca1a	42.9725	38.4195	29.4237	39.437	26.4942	35.8817	29.9031	18.3306	37.5632	27.6524	0.423582	0.164713
ENSMUSG00000110279	Gm45552	3.30558	6.72341	3.3627	7.6683	0.883142	4.60021	2.99031	0	5.265	2.11842	1.26826	0.16477
ENSMUSG00000027165	B230118H07Rik	274.363	391.879	294.237	276.059	360.322	326.615	344.883	402.052	309.134	358.468	-0.210837	0.164846
ENSMUSG00000028436	Dcaf12	647.893	691.551	654.046	600.318	623.498	610.908	498.385	586.581	648.452	579.843	0.161327	0.164905
ENSMUSG00000085791	Rpl30-ps9	0	3.84195	4.20338	1.09547	0.883142	0.920043	0	0	2.2852	0.450796	2.2482	0.164911
ENSMUSG00000026417	Pigr	28906.2	26685.2	29874.3	21658.6	26581.7	29576.6	30004.8	35363.5	26781.1	30381.6	-0.181926	0.16495
ENSMUSG00000097816	Gm26811	5.50929	4.80244	1.68135	10.9547	2.64942	1.84009	1.99354	3.66613	5.73695	2.5373	1.17348	0.164959
ENSMUSG00000044052	Ccr10	22.0372	8.64439	7.56608	7.6683	9.71456	20.2409	27.9096	15.8866	11.479	18.4379	-0.697722	0.165037
ENSMUSG00000097311	Gm26871	3.30558	2.88146	0.840676	0	0	0	0.99677	0	1.75693	0.249193	2.53356	0.165264
ENSMUSG00000031568	Rwdd4a	340.474	418.773	337.111	361.506	383.283	405.739	399.705	463.154	364.466	412.97	-0.178175	0.165307
ENSMUSG00000026043	Col3a1	1445.64	1563.67	2078.99	1886.4	1529.6	1588.91	1786.21	812.659	1743.68	1429.35	0.286262	0.165329
ENSMUSG00000020774	Aspa	178.501	202.663	223.62	154.461	214.603	190.449	264.144	226.078	189.811	223.819	-0.232825	0.165348
ENSMUSG00000077557	Gm23706	0	0	0	0	3.53257	0	0.99677	1.22204	0	1.43785	-2.98397	0.165356
ENSMUSG00000050157	Gm867	2.20372	1.92098	0.840676	2.19094	2.64942	4.60021	4.98385	4.88817	1.78908	4.28042	-1.27735	0.165375
ENSMUSG00000050822	Slc29a4	5.50929	0.960488	3.3627	1.09547	1.76628	0.920043	0	0	2.73199	0.671581	1.93331	0.165379
ENSMUSG00000108053	Gm43890	0	0	0	2.19094	1.76628	2.76013	1.99354	2.44409	0.547736	2.24101	-2.14032	0.165401
ENSMUSG00000029026	Trp73	1.10186	0.960488	5.04406	0	0	0	0.99677	0	1.7766	0.249193	2.58543	0.165543
ENSMUSG00000022181	C6	975.145	978.737	881.029	944.296	765.684	989.966	1182.17	2510.08	944.802	1361.97	-0.527154	0.165618
ENSMUSG00000081239	Gm11836	2.20372	2.88146	1.68135	4.38189	3.53257	3.68017	11.9612	4.88817	2.7871	6.01554	-1.12328	0.165634
ENSMUSG00000066553	Gm6969	62.8059	62.4317	63.8914	49.2962	45.0402	47.8422	45.8514	53.7699	59.6063	48.1259	0.316425	0.165706
ENSMUSG00000041468	Gpr12	52.8892	24.9727	50.4406	39.437	45.0402	35.8817	21.9289	10.9984	41.9349	28.4623	0.540848	0.165817
ENSMUSG00000052760	A630001G21Rik	29.7502	17.2888	25.2203	30.6732	18.546	17.4808	20.9322	15.8866	25.7331	18.2114	0.488627	0.165941
ENSMUSG00000098579	Mir6937	0	0.960488	0	1.09547	1.76628	0	3.98708	3.66613	0.51399	2.35487	-2.20622	0.165979
ENSMUSG00000112770	CT572999.1	0	0	5.04406	5.47736	0	0	0.99677	1.22204	2.63035	0.554703	2.36874	0.166111
ENSMUSG00000104664	Gm35570	93.658	38.4195	41.1931	51.4872	45.9234	49.6823	103.664	117.316	56.1894	79.1465	-0.493143	0.166164
ENSMUSG00000021178	Psmc1	2601.49	2846.89	2646.45	2644.47	3075.1	2590.84	2857.74	3385.06	2684.82	2977.18	-0.148661	0.166202
ENSMUSG00000049687	Fam109b	2.20372	2.88146	2.52203	2.19094	8.83142	10.1205	3.98708	0	2.44954	5.73474	-1.25274	0.166283
ENSMUSG00000026872	Zeb2	314.03	419.733	416.975	313.305	308.216	322.015	380.766	217.524	366.011	307.13	0.252291	0.166445
ENSMUSG00000073888	Ccl27a	165.279	160.401	131.986	115.025	196.057	161.007	156.493	161.31	143.173	168.717	-0.239166	0.166552
ENSMUSG00000020447	Npc1l1	3.30558	0	1.68135	4.38189	0	0.920043	0.99677	0	2.3422	0.479203	2.20797	0.166569
ENSMUSG00000014226	Cacybp	600.513	668.499	523.741	557.595	604.069	628.389	603.046	892.092	587.587	681.899	-0.21296	0.166684
ENSMUSG00000047554	Tmem41b	278.77	279.502	234.549	283.727	261.41	288.893	315.976	380.055	269.137	311.584	-0.209115	0.166731
ENSMUSG00000002984	Tomm40	875.978	774.153	1051.69	822.699	1320.3	1050.69	853.235	882.315	881.129	1026.63	-0.220892	0.166742
ENSMUSG00000096370	Gm21992	6.61115	9.60488	8.40676	18.623	8.83142	5.52026	3.98708	6.11022	10.8115	6.11224	0.807332	0.166749
ENSMUSG00000006403	Adamts4	52.8892	23.0517	58.8473	42.7234	20.3123	51.5224	30.8999	20.7747	44.3779	30.8773	0.5176	0.166845
ENSMUSG00000029003	Mad2l2	343.78	392.839	333.748	365.888	320.58	368.937	252.183	307.955	359.064	312.414	0.19936	0.166894
ENSMUSG00000026864	Hspa5	13686.2	11784.2	9449.2	14092.1	10636.6	14153	15284.5	30596.3	12252.9	17667.6	-0.527959	0.166999
ENSMUSG00000041649	Klf8	1.10186	0.960488	0.840676	2.19094	0	0	0	0	1.27349	0	2.78479	0.16701
ENSMUSG00000038094	Atp13a4	1.10186	0.960488	0.840676	2.19094	0	0	0	0	1.27349	0	2.78479	0.16701
ENSMUSG00000115284	AC160550.2	1.10186	1.92098	0	0	2.64942	0.920043	4.98385	2.44409	0.755709	2.74935	-1.87415	0.167088
ENSMUSG00000097378	B230208H11Rik	15.426	20.1702	18.4949	17.5275	10.5977	5.52026	21.9289	7.33226	17.9047	11.3448	0.657512	0.167096
ENSMUSG00000024613	Tcof1	245.714	242.043	290.874	281.536	276.423	241.051	175.432	211.413	265.042	226.08	0.227403	0.167325
ENSMUSG00000072596	Ear2	116.797	159.441	200.081	143.507	130.705	138.006	152.506	73.3226	154.956	123.635	0.323703	0.167396
ENSMUSG00000061288	Taok3	902.422	1142.98	1216.46	950.869	1017.38	1022.17	920.019	640.351	1053.18	899.979	0.226095	0.167411
ENSMUSG00000048960	Prex2	207.149	180.572	195.878	190.612	192.525	163.768	256.17	333.618	193.553	236.52	-0.284366	0.167568
ENSMUSG00000057037	Cfhr1	1734.33	2175.5	1819.22	1607.06	1790.13	1753.6	2252.7	2758.15	1834.03	2138.65	-0.220827	0.167598
ENSMUSG00000092889	Gm22121	2.20372	0.960488	2.52203	2.19094	1.76628	4.60021	8.97093	3.66613	1.96929	4.75089	-1.266	0.16762
ENSMUSG00000026623	Lpgat1	4670.78	5190.48	4303.42	4284.39	4164.9	5165.12	5034.69	6949.76	4612.27	5328.62	-0.207989	0.167641
ENSMUSG00000038252	Ncapd2	81.5375	75.8785	100.04	75.5875	83.0153	59.8028	68.7772	59.8801	83.261	67.8688	0.294131	0.167745
ENSMUSG00000038811	Gngt2	235.798	284.304	289.193	220.19	207.538	230.011	235.238	226.078	257.371	224.716	0.199669	0.167773
ENSMUSG00000088545	Gm25982	2.20372	0	1.68135	5.47736	0.883142	0	0	1.22204	2.34061	0.526296	2.2188	0.167899
ENSMUSG00000064734	Gm23445	0	1.92098	2.52203	1.09547	0	0	0	0	1.38462	0	2.93446	0.168103
ENSMUSG00000022868	Ahsg	150096	133494	101523	111155	133034	143659	129939	158572	124067	141301	-0.187651	0.168106
ENSMUSG00000014426	Map3k4	437.438	367.867	461.531	432.711	442.454	362.497	323.95	358.059	424.887	371.74	0.191515	0.168265
ENSMUSG00000061882	Ccdc62	41.8706	32.6566	26.9016	47.1053	32.6762	18.4009	29.9031	28.107	37.1335	27.2718	0.437014	0.168406
ENSMUSG00000056836	Gm6851	28.6483	31.6961	22.6983	19.7185	37.0919	34.0416	34.887	30.5511	25.6903	34.1429	-0.414513	0.168574
ENSMUSG00000111971	AC158232.1	1.10186	5.76293	3.3627	1.09547	0.883142	0	0	2.44409	2.83074	0.831807	1.88211	0.168713
ENSMUSG00000050382	Kif7	39.6669	28.8146	28.583	33.9596	27.3774	30.3614	22.9257	13.4425	32.756	23.5267	0.453859	0.168735
ENSMUSG00000007207	Stx1a	24.2409	15.3678	30.2643	23.0049	16.7797	14.7207	17.9419	15.8866	23.2195	16.3322	0.511711	0.168739
ENSMUSG00000105858	2310074N15Rik	2.20372	0	1.68135	5.47736	0.883142	0	0.99677	0	2.34061	0.469978	2.21894	0.168862
ENSMUSG00000064325	Hhip	28.6483	39.38	26.9016	14.2411	33.5594	28.5213	35.8837	56.214	27.2928	38.5446	-0.480867	0.168902
ENSMUSG00000108969	Gm45044	12.1204	17.2888	16.8135	14.2411	19.4291	18.4009	18.9386	31.7731	15.116	22.1354	-0.527595	0.169122
ENSMUSG00000076612	Ighg2c	98.0654	41.301	34.4677	23.0049	35.3257	54.2825	85.7222	204.081	49.2098	94.8529	-0.945342	0.16926
ENSMUSG00000021186	Fbln5	236.9	253.569	239.593	168.703	195.174	218.05	201.348	138.091	224.691	188.166	0.253319	0.169337
ENSMUSG00000081208	Gm11400	14.3242	4.80244	9.24744	26.2913	14.1303	13.8006	34.887	25.6629	13.6663	22.1202	-0.704565	0.169468
ENSMUSG00000049109	Themis	331.659	473.52	490.955	686.861	367.387	398.378	476.456	409.384	495.749	412.902	0.264009	0.169602
ENSMUSG00000048347	Pcdhb18	1.10186	2.88146	2.52203	1.09547	3.53257	2.76013	4.98385	7.33226	1.90021	4.6522	-1.23821	0.169619
ENSMUSG00000002102	Psmc3	2797.62	3100.45	3125.63	3171.39	3672.99	3220.15	3033.17	3488.93	3048.77	3353.81	-0.137445	0.169635
ENSMUSG00000020482	Ccdc117	525.587	511.94	530.467	494.058	506.923	531.785	504.366	931.197	515.513	618.568	-0.260343	0.169646
ENSMUSG00000111017	AC061963.2	6.61115	5.76293	1.68135	1.09547	0	2.76013	1.99354	0	3.78773	1.18842	1.63165	0.169711
ENSMUSG00000097786	4933429H19Rik	2.20372	1.92098	5.88473	12.0502	7.06513	13.8006	15.9483	4.88817	5.5149	10.4256	-0.936085	0.16973
ENSMUSG00000024127	Prepl	629.161	561.885	525.423	548.831	545.782	623.789	609.027	821.213	566.325	649.953	-0.197096	0.16977
ENSMUSG00000049526	Tmem202	3.30558	6.72341	2.52203	2.19094	0.883142	0.920043	0	3.66613	3.68549	1.36733	1.51555	0.169784
ENSMUSG00000088490	Gm24400	6.61115	3.84195	2.52203	7.6683	0.883142	2.76013	2.99031	2.44409	5.16086	2.26942	1.17868	0.1699
ENSMUSG00000053334	Ficd	171.89	143.113	173.179	189.517	166.031	201.489	172.441	271.294	169.425	202.814	-0.255274	0.169906
ENSMUSG00000066278	Vps37b	189.52	208.426	184.949	204.853	219.019	234.611	224.273	215.08	196.937	223.246	-0.182652	0.169916
ENSMUSG00000026090	2010300C02Rik	14.3242	7.6839	10.9288	2.19094	3.53257	2.76013	8.97093	2.44409	8.78195	4.42693	0.986551	0.16996
ENSMUSG00000005973	Rcn1	240.205	242.043	279.104	243.195	206.655	205.17	262.151	201.637	251.137	218.903	0.199472	0.170038
ENSMUSG00000102452	Gm38344	3.30558	0	0	3.28641	0	0	0	0	1.648	0	3.14677	0.170119
ENSMUSG00000006219	Fblim1	128.917	116.219	173.179	125.979	119.224	117.765	133.567	70.8785	136.074	110.359	0.298772	0.170141
ENSMUSG00000041202	Pla2g2d	11.0186	0	22.6983	5.47736	7.06513	2.76013	0.99677	6.11022	9.79855	4.23306	1.22585	0.170165
ENSMUSG00000036356	Csgalnact1	20.9353	30.7356	31.105	27.3868	23.8448	19.3209	19.9354	17.1086	27.5407	20.0524	0.456507	0.17019
ENSMUSG00000046341	Gm11223	18.7316	30.7356	13.4508	2.19094	7.94827	8.28038	14.9516	4.88817	16.2772	9.0171	0.849041	0.170296
ENSMUSG00000086645	Gm15743	24.2409	8.64439	10.9288	30.6732	21.1954	4.60021	5.98062	10.9984	18.6218	10.6937	0.781661	0.170369
ENSMUSG00000030380	Mzf1	22.0372	26.8937	10.9288	25.1958	17.6628	15.6407	13.9548	8.5543	21.2639	13.9532	0.58139	0.170532
ENSMUSG00000084168	Atp5l2-ps	6.61115	21.1307	7.56608	9.85924	7.06513	3.68017	1.99354	12.2204	11.2918	6.23982	0.887815	0.17057
ENSMUSG00000107215	Gm43197	24.2409	23.0517	27.7423	24.1004	15.0134	13.8006	28.9063	10.9984	24.7838	17.1797	0.524961	0.17066
ENSMUSG00000029088	Kcnip4	6.61115	4.80244	5.04406	4.38189	7.06513	8.28038	13.9548	7.33226	5.20988	9.15814	-0.818345	0.170686
ENSMUSG00000030890	Ilk	25.3428	26.8937	25.2203	17.5275	35.3257	25.7612	29.9031	37.8833	23.7461	32.2183	-0.429981	0.170737
ENSMUSG00000026547	Tagln2	526.688	507.138	632.188	523.635	493.676	569.506	473.466	347.06	547.412	470.927	0.215409	0.170802
ENSMUSG00000035845	Alg12	184.01	175.769	158.888	200.471	173.979	239.211	173.438	267.627	179.785	213.564	-0.24679	0.170986
ENSMUSG00000032261	Sh3bgrl2	1323.33	1439.77	1360.21	1511.75	1275.26	1294.5	1189.15	1377.24	1408.77	1284.04	0.134086	0.171033
ENSMUSG00000027309	4930402H24Rik	982.858	1017.16	955.008	1138.19	944.962	1025.85	916.032	743.002	1023.3	907.461	0.171473	0.171238
ENSMUSG00000021065	Fut8	55.0929	111.417	89.9523	88.7332	50.3391	66.2431	75.7545	81.8769	86.2988	68.5534	0.342277	0.171243
ENSMUSG00000003410	Elavl3	0	0	0	1.09547	0	0.920043	4.98385	1.22204	0.273868	1.78148	-2.55696	0.171258
ENSMUSG00000025193	Cutc	295.298	340.013	327.023	329.737	405.362	334.896	345.879	367.835	323.018	363.493	-0.169831	0.171342
ENSMUSG00000022285	Ywhaz	1465.47	1549.27	1414.86	1546.81	1246.11	1381.9	1245.96	1533.66	1494.1	1351.91	0.145001	0.171412
ENSMUSG00000051786	Tubgcp6	347.085	262.213	271.538	295.777	260.527	273.253	268.131	221.19	294.154	255.775	0.196919	0.171436
ENSMUSG00000109008	Gm44899	4.40743	6.72341	14.2915	16.4321	5.29885	3.68017	4.98385	9.77635	10.4636	5.9348	0.850248	0.171509
ENSMUSG00000023942	Slc29a1	2657.68	2618.29	2845.69	2855.89	2939.98	3010.38	2929.51	2984.23	2744.39	2966.02	-0.111952	0.171556
ENSMUSG00000097068	Gm26760	0	0.960488	0	1.09547	3.53257	0	1.99354	3.66613	0.51399	2.29806	-2.17854	0.171706
ENSMUSG00000032834	Pwp2	363.613	289.107	369.897	373.556	392.998	377.217	404.689	399.608	349.043	393.628	-0.173539	0.171718
ENSMUSG00000057132	Rpgrip1	18.7316	25.9332	16.8135	24.1004	18.546	11.0405	14.9516	14.6645	21.3947	14.8006	0.526223	0.171738
ENSMUSG00000048621	Gm6377	9.91673	25.9332	25.2203	25.1958	11.4808	11.9606	9.9677	24.4409	21.5665	14.4625	0.606555	0.17179
ENSMUSG00000004460	Dnajb11	1625.24	1557.91	1187.88	1387.96	1579.06	1457.35	1430.37	2259.56	1439.75	1681.58	-0.22355	0.171927
ENSMUSG00000039458	Mtmr12	182.909	188.256	167.295	170.894	151.9	165.608	162.474	134.425	177.338	153.602	0.20329	0.171987
ENSMUSG00000082100	Glns-ps1	25.3428	22.0912	20.1762	35.0551	32.6762	28.5213	41.8644	34.2172	25.6663	34.3198	-0.427617	0.17199
ENSMUSG00000026272	Agxt	4460.32	5041.6	5396.3	4397.22	6367.45	5356.49	4402.73	5720.38	4823.86	5461.76	-0.179039	0.17202
ENSMUSG00000051412	Vamp7	525.587	669.46	505.246	505.012	576.692	575.947	613.014	767.443	551.326	633.274	-0.19785	0.172081
ENSMUSG00000067049	Unc93a	9.91673	23.0517	20.1762	18.623	10.5977	10.1205	8.97093	18.3306	17.9419	12.0049	0.608151	0.172199
ENSMUSG00000003824	Syce2	145.445	147.915	152.162	150.08	171.329	147.207	206.331	167.42	148.901	173.072	-0.216014	0.172394
ENSMUSG00000051844	B230319C09Rik	15.426	8.64439	14.2915	12.0502	5.29885	7.36034	12.958	4.88817	12.603	7.62634	0.71824	0.17248
ENSMUSG00000085990	Gm16731	4.40743	8.64439	5.88473	2.19094	2.64942	10.1205	11.9612	15.8866	5.28187	10.1544	-0.90686	0.172589
ENSMUSG00000084817	Gm5526	130.019	151.757	146.278	150.08	126.289	122.366	116.622	134.425	144.533	124.925	0.213414	0.172794
ENSMUSG00000037010	Apln	1.10186	3.84195	5.04406	14.2411	1.76628	0.920043	2.99031	4.88817	6.05725	2.6412	1.23208	0.172807
ENSMUSG00000083220	Gm12919	0	0.960488	0	0	0	0.920043	4.98385	1.22204	0.240122	1.78148	-2.55703	0.172877
ENSMUSG00000095478	Gm9824	419.808	486.967	518.697	459.003	544.015	1024.93	398.708	411.829	471.119	594.87	-0.337267	0.172901
ENSMUSG00000109089	4833411C07Rik	185.112	225.715	243.796	216.903	244.63	228.171	282.086	246.853	217.882	250.435	-0.197479	0.173001
ENSMUSG00000000223	Drp2	0	0.960488	0	0	1.76628	1.84009	2.99031	0	0.240122	1.64917	-2.47245	0.173124
ENSMUSG00000020571	Pdia6	4856.99	4395.19	3372.79	4521.01	4269.11	4134.67	4986.84	6673.58	4286.5	5016.05	-0.226633	0.173165
ENSMUSG00000107994	D830050J10Rik	45.1762	45.1429	53.8033	50.3917	41.5077	40.4819	32.8934	39.1054	48.6285	38.4971	0.337964	0.173421
ENSMUSG00000022425	Enpp2	2104.55	2119.8	1869.66	1725.37	1932.31	2251.34	2186.91	2310.88	1954.84	2170.36	-0.150546	0.173507
ENSMUSG00000051452	Gm11437	39.6669	45.1429	26.061	37.246	36.2088	53.3625	65.7868	39.1054	37.0292	48.6159	-0.400061	0.173578
ENSMUSG00000021665	Hexb	310.724	316	308.528	303.446	249.046	293.494	287.07	274.96	309.675	276.142	0.165995	0.173597
ENSMUSG00000070546	Mrgprb3	0	5.76293	0.840676	0	0	0	0	0	1.6509	0	3.17981	0.173603
ENSMUSG00000062647	Rpl7a	1022.52	1037.33	1329.95	969.492	1404.2	1105.89	1072.52	1418.79	1089.82	1250.35	-0.197059	0.173643
ENSMUSG00000029916	Agk	163.075	181.532	173.179	163.225	207.538	195.969	187.393	185.751	170.253	194.163	-0.18991	0.173658
ENSMUSG00000029309	Sparcl1	222.575	210.347	196.718	135.838	142.186	205.17	158.486	125.87	191.37	157.928	0.274842	0.173822
ENSMUSG00000083621	Gm14586	78.232	119.1	106.766	106.261	106.86	142.607	108.648	136.869	102.59	123.746	-0.265173	0.173904
ENSMUSG00000031221	Igbp1	810.968	1060.38	950.805	863.232	944.962	985.366	1040.63	1176.83	921.346	1036.95	-0.168719	0.174093
ENSMUSG00000030057	Cnbp	4818.43	5775.41	5152.5	4926.34	5687.43	5341.77	5399.5	6381.51	5168.17	5702.55	-0.141658	0.1741
ENSMUSG00000107103	Gm43164	2.20372	1.92098	2.52203	0	0.883142	0	0	0	1.66168	0.220785	2.47092	0.174101
ENSMUSG00000022445	Cyp2d26	19646.1	18558.5	19262.4	17986.5	22744.4	19592.3	20453.7	19374.3	18863.4	20541.2	-0.12297	0.174117
ENSMUSG00000050321	Neto1	1.10186	3.84195	6.72541	4.38189	0	0.920043	0	4.88817	4.01278	1.45205	1.59315	0.17415
ENSMUSG00000110682	A530010L16Rik	2.20372	4.80244	3.3627	3.28641	7.94827	3.68017	7.97416	7.33226	3.41382	6.73372	-0.966122	0.174191
ENSMUSG00000022949	Clic6	0	1.92098	3.3627	1.09547	2.64942	3.68017	6.97739	3.66613	1.59479	4.24328	-1.34785	0.174279
ENSMUSG00000086065	Gm16180	0	0	0.840676	0	0	1.84009	5.98062	0	0.210169	1.95518	-2.7037	0.174311
ENSMUSG00000028565	Nfia	513.466	574.372	574.182	492.962	458.351	448.981	507.356	520.59	538.745	483.819	0.158093	0.174328
ENSMUSG00000040624	Plekhg1	114.593	122.942	125.261	129.266	89.1973	84.6439	121.606	119.76	123.016	103.802	0.252042	0.17441
ENSMUSG00000003484	Cyp4f18	58.3985	51.8663	88.271	38.3415	47.6896	48.7623	51.8321	31.7731	59.2193	45.0143	0.396913	0.174489
ENSMUSG00000007039	Ddah2	124.51	116.219	168.976	122.693	127.172	116.845	114.629	81.8769	133.099	110.131	0.270609	0.174528
ENSMUSG00000000305	Cdh4	42.9725	19.2098	29.4237	39.437	59.1705	33.1215	65.7868	24.4409	32.7607	45.6299	-0.4924	0.174531
ENSMUSG00000030228	Pik3c2g	74.9264	71.0761	51.2812	72.3011	40.6245	63.4829	56.8159	53.7699	67.3962	53.6733	0.324579	0.174535
ENSMUSG00000049124	Gm8186	44.0743	58.5897	36.1491	79.9694	52.1054	104.885	56.8159	75.7667	54.6956	72.3932	-0.409656	0.174605
ENSMUSG00000023070	Rgn	10824.7	15623.3	17614.7	16176.8	17790	13624.9	17130.5	22308.4	15059.9	17713.5	-0.234041	0.174641
ENSMUSG00000087248	Gm16120	0	2.88146	4.20338	2.19094	1.76628	0	0	0	2.31895	0.441571	2.27348	0.174696
ENSMUSG00000031059	Ndufb11	3657.07	4439.37	4405.98	3709.27	4938.53	4192.63	4028.95	4977.38	4052.92	4534.37	-0.161605	0.174737
ENSMUSG00000048138	Dmrt2	4.40743	3.84195	3.3627	4.38189	1.76628	0	3.98708	0	3.99849	1.43834	1.44223	0.174835
ENSMUSG00000109679	Gm45342	1.10186	1.92098	0	6.57283	0	0.920043	0.99677	0	2.39892	0.479203	2.23791	0.174894
ENSMUSG00000067629	Syngap1	81.5375	36.4985	47.9185	47.1053	62.7031	64.403	90.7061	57.436	53.265	68.812	-0.377279	0.175047
ENSMUSG00000046722	Cdc42se1	618.143	635.843	670.019	623.323	607.601	650.47	501.375	508.37	636.832	566.954	0.166358	0.175116
ENSMUSG00000024975	Pdcd4	1190.01	1227.5	1292.96	1107.52	1412.14	1123.37	1379.53	1460.34	1204.5	1343.85	-0.156893	0.175128
ENSMUSG00000098320	Vis1	3.30558	0.960488	2.52203	0	0.883142	0	0	0	1.69702	0.220785	2.49323	0.175174
ENSMUSG00000039781	Cep131	99.1673	83.5624	112.651	107.356	156.316	122.366	118.616	89.2092	100.684	121.627	-0.278672	0.175204
ENSMUSG00000085322	Gm14261	1.10186	0	3.3627	1.09547	0	0	0	0	1.39001	0	2.93692	0.175208
ENSMUSG00000034616	Ssh3	357.002	297.751	354.765	366.983	305.567	318.335	316.973	278.626	344.125	304.875	0.172343	0.175303
ENSMUSG00000028979	Masp2	3902.78	3395.32	3468.63	4010.52	4231.13	3810.82	4240.26	3923.98	3694.31	4051.55	-0.133519	0.175309
ENSMUSG00000114873	AC154849.4	0	0	0	0	1.76628	0.920043	0.99677	1.22204	0	1.22628	-2.74909	0.175435
ENSMUSG00000039220	Ppp1r10	1000.49	675.223	1011.33	801.885	757.736	868.52	683.784	717.339	872.232	756.845	0.204392	0.175538
ENSMUSG00000109799	Gm45515	4.40743	7.6839	2.52203	5.47736	1.76628	1.84009	3.98708	1.22204	5.02268	2.20387	1.1712	0.175594
ENSMUSG00000059864	Olfr1393	0	8.64439	6.72541	3.28641	0.883142	0.920043	3.98708	1.22204	4.66405	1.75308	1.43713	0.175723
ENSMUSG00000022724	Riox2	278.77	298.712	275.742	299.064	264.942	249.332	251.186	262.739	288.072	257.05	0.164181	0.175731
ENSMUSG00000082284	H3f3a-ps1	27.5465	26.8937	20.1762	21.9094	28.2605	8.28038	15.9483	12.2204	24.1314	16.1774	0.561516	0.17577
ENSMUSG00000042102	Dmgdh	9650.08	11045.6	9851.88	8228.09	11399.6	10152.7	9837.13	11925.9	9693.91	10828.8	-0.159608	0.175789
ENSMUSG00000087277	2010013B24Rik	0	0.960488	0	0	1.76628	2.76013	1.99354	0	0.240122	1.62999	-2.4597	0.175924
ENSMUSG00000081984	Dnajb3	16.5279	4.80244	3.3627	21.9094	6.18199	5.52026	8.97093	3.66613	11.6506	6.08483	0.906066	0.176047
ENSMUSG00000114612	AC129085.3	1.10186	2.88146	6.72541	2.19094	5.29885	8.28038	5.98062	7.33226	3.22492	6.72303	-1.0088	0.176059
ENSMUSG00000033508	Asprv1	5.50929	6.72341	3.3627	2.19094	9.71456	8.28038	6.97739	7.33226	4.44659	8.07615	-0.866547	0.176118
ENSMUSG00000063354	Slc39a4	788.931	592.621	720.459	793.121	686.201	835.399	484.43	331.174	723.783	584.301	0.306718	0.176119
ENSMUSG00000086930	Frs3os	4.40743	8.64439	0.840676	5.47736	2.64942	2.76013	1.99354	0	4.84246	1.85077	1.3265	0.176184
ENSMUSG00000020901	Pik3r5	87.0468	89.3254	105.925	94.2106	83.0153	85.564	73.761	73.3226	94.127	78.9157	0.25375	0.176365
ENSMUSG00000054426	A930005H10Rik	82.6394	89.3254	82.3863	76.683	103.328	76.3635	112.635	106.318	82.7585	99.661	-0.264174	0.176437
ENSMUSG00000093674	Rpl41	4747.91	7034.61	5530.81	5498.17	5194.64	5324.29	4858.26	4890.62	5702.88	5066.95	0.170607	0.176443
ENSMUSG00000078695	Cisd3	1144.83	1275.53	1227.39	1213.78	1349.44	1336.82	1346.64	1256.26	1215.38	1322.29	-0.121767	0.17651
ENSMUSG00000023348	Trip6	715.106	605.107	680.107	807.363	755.086	638.51	501.375	532.811	701.921	606.946	0.207595	0.176569
ENSMUSG00000019312	Grb7	2344.76	2120.76	2203.41	1984.99	2873.74	2040.65	2386.27	2403.76	2163.48	2426.11	-0.165384	0.176581
ENSMUSG00000031150	Ccdc120	228.085	125.824	162.25	192.803	134.238	201.489	142.538	68.4344	177.241	136.675	0.367879	0.176633
ENSMUSG00000043439	Epop	52.8892	35.538	93.315	100.783	86.5479	89.2441	124.596	74.5446	70.6314	93.7332	-0.408683	0.176849
ENSMUSG00000002033	Cd3g	9.91673	4.80244	29.4237	5.47736	24.728	13.8006	31.8967	14.6645	12.405	21.2724	-0.757084	0.177079
ENSMUSG00000058396	Gpr182	656.708	546.518	597.721	565.263	624.381	678.991	633.946	683.122	591.552	655.11	-0.147085	0.177102
ENSMUSG00000030110	Ret	0	0	4.20338	3.28641	0	0	0	1.22204	1.87245	0.305511	2.64245	0.177237
ENSMUSG00000038418	Egr1	236.9	249.727	191.674	305.637	220.785	250.252	218.293	596.357	245.984	321.422	-0.38336	0.177438
ENSMUSG00000043895	S1pr2	253.428	204.584	207.647	174.18	183.693	195.969	204.338	106.318	209.96	172.58	0.277379	0.177533
ENSMUSG00000025243	Slc6a20b	4.40743	9.60488	1.68135	3.28641	2.64942	2.76013	1.99354	0	4.74502	1.85077	1.30353	0.177622
ENSMUSG00000032850	Rnft2	3.30558	4.80244	4.20338	6.57283	0	2.76013	2.99031	2.44409	4.72106	2.04863	1.22701	0.177727
ENSMUSG00000026072	Il1r1	928.867	608.949	494.318	639.755	461	837.239	696.742	2552.85	667.972	1136.96	-0.767084	0.17786
ENSMUSG00000023046	Igfbp6	83.7413	139.271	135.349	60.2509	109.51	110.405	35.8837	40.3274	104.653	74.0315	0.495549	0.177904
ENSMUSG00000024188	Luc7l	606.022	523.466	472.46	523.635	507.806	581.467	608.03	725.894	531.396	605.799	-0.188082	0.17795
ENSMUSG00000058571	Gpc6	33.0558	27.8541	59.688	38.3415	30.91	34.0416	26.9128	26.885	39.7349	29.6873	0.425169	0.178084
ENSMUSG00000074264	Amy1	4724.77	5504.56	3957.9	4395.03	4911.15	4635.17	5165.26	6441.39	4645.57	5288.24	-0.186743	0.178095
ENSMUSG00000025507	Pidd1	42.9725	42.2615	42.8745	60.2509	64.4693	51.5224	74.7578	46.4376	47.0898	59.2968	-0.341565	0.178274
ENSMUSG00000062542	Syt9	28.6483	25.9332	31.9457	32.8641	26.4942	18.4009	21.9289	21.9968	29.8478	22.2052	0.425072	0.178287
ENSMUSG00000107698	Gm44430	2.20372	4.80244	5.04406	7.6683	2.64942	0.920043	0	4.88817	4.92963	2.11441	1.27224	0.178334
ENSMUSG00000006169	Clint1	1382.83	1452.26	1419.9	1419.73	1340.61	1322.1	1194.13	1357.69	1418.68	1303.63	0.122293	0.178434
ENSMUSG00000034634	Ly6d	1436.82	1572.32	1118.1	1968.56	763.034	1912.77	815.358	650.127	1523.95	1035.32	0.557394	0.178554
ENSMUSG00000018565	Elp5	364.715	442.785	368.216	412.993	445.103	420.459	422.631	497.372	397.177	446.391	-0.167064	0.178723
ENSMUSG00000061947	Serpina10	3875.24	4602.66	3081.08	3590.96	3489.29	3910.18	4181.45	6437.72	3787.48	4504.66	-0.249914	0.178787
ENSMUSG00000112690	Gm2446	0	2.88146	0	1.09547	6.18199	1.84009	0	6.11022	0.994234	3.53307	-1.82277	0.178844
ENSMUSG00000058626	Capn11	2.20372	2.88146	9.24744	14.2411	0.883142	0	95.69	29.329	7.14344	31.4755	-2.13872	0.178855
ENSMUSG00000030872	Gga2	706.291	697.314	646.48	628.801	702.098	637.59	515.33	502.26	669.722	589.319	0.182304	0.178871
ENSMUSG00000096842	Gm10736	20.9353	28.8146	31.105	13.1457	17.6628	29.4414	37.8773	52.5479	23.5002	34.3823	-0.523722	0.178947
ENSMUSG00000009350	Mpo	0	2.88146	0	2.19094	1.76628	6.4403	0	8.5543	1.2681	4.19022	-1.72127	0.179012
ENSMUSG00000001280	Sp1	698.578	653.132	676.744	669.333	646.46	694.632	820.342	867.651	674.447	757.271	-0.16541	0.179024
ENSMUSG00000042854	Trp53rkb	60.6022	57.6293	62.21	52.5826	45.0402	54.2825	43.8579	45.2156	58.256	47.0991	0.306549	0.179219
ENSMUSG00000026032	Ndufb3	1162.46	1529.1	1287.92	1257.6	1424.51	1342.34	1406.44	1716.97	1309.27	1472.57	-0.16845	0.179239
ENSMUSG00000065947	mt-Nd4l	430.827	820.256	595.199	1270.75	969.69	514.304	2999.28	1036.29	779.257	1379.89	-0.824431	0.179311
ENSMUSG00000017950	Hnf4a	15931.8	12889.7	13166.7	14627.8	14782.9	16339	12053.9	23590.3	14154	16691.6	-0.237857	0.179375
ENSMUSG00000111082	Gm30934	12.1204	15.3678	13.4508	15.3366	16.7797	19.3209	24.9193	19.5527	14.0689	20.1431	-0.515215	0.179418
ENSMUSG00000091387	Gcnt4	61.7041	66.2737	73.9795	79.9694	54.7548	76.3635	83.7287	156.422	70.4817	92.8171	-0.386157	0.179783
ENSMUSG00000005087	Cd44	254.529	307.356	302.643	232.24	187.226	236.451	272.118	250.519	274.192	236.579	0.217366	0.17983
ENSMUSG00000024066	Xdh	4170.54	3481.77	4527.88	4087.2	4924.4	4150.31	4718.71	4268.6	4066.85	4515.5	-0.151016	0.179903
ENSMUSG00000026365	Cfh	12172.2	12564.1	10234.4	12279.1	8950.64	11905.4	15722.1	20340.9	11812.5	14229.7	-0.268519	0.180262
ENSMUSG00000109420	Gm44702	6.61115	0.960488	5.88473	3.28641	0	0.920043	1.99354	3.66613	4.1857	1.64493	1.42213	0.180277
ENSMUSG00000004677	Myo9b	1440.13	1245.75	1393.84	1634.44	1365.34	1404.91	1255.93	1015.52	1428.54	1260.42	0.179267	0.180302
ENSMUSG00000032548	Slco2a1	660.013	601.265	529.626	600.318	707.396	764.555	588.094	626.908	597.806	671.739	-0.170442	0.180314
ENSMUSG00000110235	Gm5086	4.40743	11.5259	15.9728	3.28641	4.41571	6.4403	5.98062	1.22204	8.79814	4.51467	0.959833	0.180363
ENSMUSG00000044461	Shisa2	13.2223	29.7751	23.5389	24.1004	22.0785	53.3625	20.9322	34.2172	22.6592	32.6476	-0.52136	0.180448
ENSMUSG00000103979	Gm20305	0	0.960488	0	0	0	0.920043	6.97739	0	0.240122	1.97436	-2.71541	0.180487
ENSMUSG00000112843	Gm46224	1.10186	0.960488	2.52203	3.28641	1.76628	3.68017	4.98385	8.5543	1.9677	4.74615	-1.23816	0.18052
ENSMUSG00000035109	Shc4	4.40743	3.84195	2.52203	8.76377	4.41571	0	0.99677	2.44409	4.8838	1.96414	1.29514	0.180525
ENSMUSG00000057236	Rbbp4	1253.92	1365.81	1408.97	1380.29	1418.33	1416.87	1420.4	1720.64	1352.25	1494.06	-0.142601	0.180653
ENSMUSG00000108045	Gm5576	0	0	0.840676	0	1.76628	0.920043	3.98708	0	0.210169	1.66835	-2.48424	0.180721
ENSMUSG00000101904	Gm29427	5.50929	6.72341	2.52203	5.47736	1.76628	0.920043	2.99031	3.66613	5.05802	2.33569	1.14156	0.180879
ENSMUSG00000047631	Apof	13184.8	13179.8	11138.1	13746	13392	12988.2	14393.4	15922	12812.2	14173.9	-0.145702	0.180916
ENSMUSG00000110393	Gm36445	15.426	17.2888	7.56608	15.3366	3.53257	10.1205	12.958	7.33226	13.9044	8.48583	0.707009	0.180961
ENSMUSG00000045763	Basp1	149.853	195.939	228.664	198.28	194.291	201.489	133.567	87.9871	193.184	154.334	0.319458	0.180972
ENSMUSG00000103039	Gm37123	9.91673	15.3678	10.9288	13.1457	14.1303	15.6407	24.9193	18.3306	12.3397	18.2552	-0.559464	0.181007
ENSMUSG00000008601	Rab25	11.0186	8.64439	15.1322	9.85924	7.06513	7.36034	6.97739	6.11022	11.1636	6.87827	0.701597	0.181026
ENSMUSG00000046683	0610025J13Rik	0	0	0	1.09547	0	5.52026	1.99354	0	0.273868	1.87845	-2.65575	0.181042
ENSMUSG00000080893	Gm15920	316.233	475.441	489.273	403.134	530.768	474.742	436.585	502.26	421.02	486.089	-0.205105	0.181093
ENSMUSG00000032808	Cyp2c38	2683.03	3305.04	1867.98	2233.67	2160.16	2151.98	2229.78	2178.9	2522.43	2180.21	0.210213	0.181237
ENSMUSG00000012428	Steap4	2924.33	3132.15	3415.67	2726.63	2274.09	3356.32	4158.53	8406.44	3049.69	4548.84	-0.576694	0.181259
ENSMUSG00000001119	Col6a1	445.151	404.365	456.487	341.787	402.713	375.377	371.795	279.848	411.948	357.433	0.202791	0.181262
ENSMUSG00000033917	Gde1	1606.51	1603.05	1356.01	1423.02	1561.39	1510.71	1730.39	1839.18	1497.15	1660.42	-0.148943	0.181301
ENSMUSG00000028470	Hint2	1569.05	2072.73	2030.23	1785.62	2262.61	2020.41	1871.93	2193.57	1864.41	2087.13	-0.162223	0.181335
ENSMUSG00000035226	Rims4	2.20372	0.960488	0.840676	10.9547	4.41571	10.1205	11.9612	4.88817	3.7399	7.8464	-1.11354	0.181348
ENSMUSG00000069601	Ank3	455.068	488.888	559.89	489.676	439.805	552.026	379.769	353.171	498.38	431.193	0.20756	0.181418
ENSMUSG00000049721	Gal3st1	160.871	187.295	200.922	213.617	194.291	199.649	128.583	95.3194	190.676	154.461	0.297843	0.181614
ENSMUSG00000030614	Tmem126b	565.254	662.737	562.412	468.862	617.316	618.269	640.923	664.792	564.816	635.325	-0.168209	0.181763
ENSMUSG00000022711	Pmm2	1058.89	1028.68	1097.92	1017.69	1226.68	1145.45	1118.38	1090.06	1050.8	1145.14	-0.124406	0.181871
ENSMUSG00000033114	Slc35d2	348.187	413.01	358.128	429.425	449.519	339.496	525.298	472.931	387.187	446.811	-0.205929	0.182264
ENSMUSG00000026456	Cyb5r1	166.381	158.48	124.42	164.321	131.588	137.086	149.516	96.5414	153.4	128.683	0.244996	0.182652
ENSMUSG00000097164	Cep83os	35.2595	42.2615	36.1491	26.2913	46.8065	43.242	43.8579	45.2156	34.9903	44.7805	-0.350698	0.182665
ENSMUSG00000024143	Rhoq	384.549	361.143	290.033	328.641	304.684	328.455	307.005	251.741	341.092	297.971	0.190585	0.182845
ENSMUSG00000032310	Cyp1a2	4811.82	4274.17	6480.77	6749.2	7872.32	4948.91	6855.79	6533.04	5578.99	6552.52	-0.232031	0.182874
ENSMUSG00000053358	Gm9905	14.3242	18.2493	7.56608	12.0502	20.3123	18.4009	19.9354	17.1086	13.0474	18.9393	-0.550153	0.183067
ENSMUSG00000006464	Bbs1	45.1762	40.3405	31.9457	31.7687	52.9885	52.4424	41.8644	41.5495	37.3078	47.2112	-0.349398	0.183103
ENSMUSG00000001240	Ramp2	224.779	189.216	292.555	238.813	212.837	204.249	198.357	201.637	236.341	204.27	0.212055	0.183206
ENSMUSG00000032342	Mto1	380.141	318.882	332.908	319.878	379.751	369.857	360.831	399.608	337.952	377.512	-0.159683	0.183262
ENSMUSG00000038641	Akr1d1	2170.66	3306.96	3155.9	2446.19	3157.23	2906.41	4113.67	2743.49	2769.93	3230.2	-0.221568	0.183351
ENSMUSG00000068226	Gm6723	7.71301	4.80244	3.3627	2.19094	0	0.920043	2.99031	3.66613	4.51727	1.89412	1.31246	0.183386
ENSMUSG00000113776	Gm19327	3.30558	0	3.3627	2.19094	0	0	0.99677	1.22204	2.21481	0.554703	2.12004	0.183419
ENSMUSG00000055493	Epm2a	186.214	230.517	217.735	212.521	207.538	196.889	157.49	173.53	211.747	183.862	0.202437	0.183508
ENSMUSG00000015243	Abca1	3573.33	2817.11	3007.1	3199.87	2839.3	3265.23	3954.19	4330.92	3149.35	3597.41	-0.19167	0.183572
ENSMUSG00000001918	Slc1a5	121.204	96.0488	128.623	122.693	98.9119	102.125	120.609	58.6581	117.142	95.076	0.293878	0.183655
ENSMUSG00000024246	Thumpd2	58.3985	43.2219	34.4677	44.9143	40.6245	33.1215	34.887	30.5511	45.2506	34.796	0.365304	0.183691
ENSMUSG00000079834	Tmlhe	307.419	400.523	374.101	359.315	390.349	391.938	444.56	395.942	360.339	405.697	-0.169315	0.183698
ENSMUSG00000032178	Ilf3	458.373	366.906	447.24	399.847	504.274	414.019	470.476	492.483	418.092	470.313	-0.16919	0.183819
ENSMUSG00000029463	Fam216a	31.9539	43.2219	43.7152	26.2913	64.4693	37.7217	42.8611	45.2156	36.2956	47.567	-0.384368	0.183847
ENSMUSG00000106867	Gm43800	3.30558	5.76293	6.72541	13.1457	3.53257	2.76013	3.98708	4.88817	7.23489	3.79199	0.942661	0.183932
ENSMUSG00000063727	Tnfrsf11b	70.519	95.0883	100.04	86.5423	44.1571	70.8433	98.6803	67.2124	88.0475	70.2233	0.332405	0.184028
ENSMUSG00000087690	Gm16031	0	0	0	0	0	0.920043	0.99677	3.66613	0	1.39574	-2.89939	0.184129
ENSMUSG00000024427	Spry4	79.3338	67.2341	175.701	117.215	165.147	117.765	82.7319	228.522	109.871	148.542	-0.428704	0.184191
ENSMUSG00000109297	Gm31522	51.7874	20.1702	18.4949	37.246	15.0134	33.1215	25.916	9.77635	31.9246	20.9568	0.585931	0.184235
ENSMUSG00000026938	Fcna	829.7	1114.17	1088.68	995.784	1293.8	1002.85	1047.61	1214.71	1007.08	1139.74	-0.177621	0.184288
ENSMUSG00000004609	Cd33	28.6483	43.2219	27.7423	33.9596	28.2605	33.1215	50.8353	70.8785	33.3931	45.774	-0.440926	0.184306
ENSMUSG00000036442	Thap11	572.967	482.165	596.039	586.077	748.904	680.832	521.311	593.913	559.312	636.24	-0.187185	0.184542
ENSMUSG00000002699	Lcp2	159.77	171.927	206.806	111.738	128.056	166.528	142.538	91.6532	162.56	132.194	0.297309	0.184625
ENSMUSG00000031604	Msmo1	381.243	728.05	622.1	897.191	689.734	624.709	1243.97	741.78	657.146	825.048	-0.328121	0.184662
ENSMUSG00000003545	Fosb	25.3428	24.0122	19.3355	27.3868	13.2471	23.9211	13.9548	17.1086	24.0193	17.0579	0.486653	0.184684
ENSMUSG00000054385	Ceacam2	9.91673	5.76293	8.40676	9.85924	17.6628	13.8006	13.9548	7.33226	8.48641	13.1876	-0.660424	0.184745
ENSMUSG00000026575	Nme7	145.445	149.836	146.278	152.271	129.822	139.846	123.6	122.204	148.457	128.868	0.201613	0.184785
ENSMUSG00000089781	Gm15756	5.50929	6.72341	7.56608	13.1457	12.364	11.9606	17.9419	9.77635	8.23611	13.0107	-0.671693	0.184794
ENSMUSG00000079620	Muc4	0	3.84195	13.4508	0	0	0	0.99677	3.66613	4.32319	1.16573	2.00078	0.184804
ENSMUSG00000067279	Ppp1r3c	693.069	921.108	577.544	836.94	897.272	779.276	732.626	1162.16	757.165	892.834	-0.237251	0.184922
ENSMUSG00000022300	Dcaf13	126.714	161.362	135.349	156.652	145.718	156.407	153.503	240.743	145.019	174.093	-0.257259	0.185014
ENSMUSG00000042106	Fam212a	2.20372	0.960488	9.24744	10.9547	16.7797	9.20043	12.958	4.88817	5.84159	10.9566	-0.914908	0.185075
ENSMUSG00000031841	Cdh13	83.7413	65.3132	97.5184	102.974	108.626	87.4041	132.57	96.5414	87.3868	106.286	-0.283426	0.185146
ENSMUSG00000085303	Gm16751	2.20372	0.960488	0	1.09547	3.53257	1.84009	2.99031	3.66613	1.06492	3.00727	-1.55323	0.185266
ENSMUSG00000039476	Prrx2	2.20372	6.72341	3.3627	2.19094	0.883142	0	3.98708	0	3.62019	1.21756	1.5649	0.185279
ENSMUSG00000027854	Sike1	347.085	381.314	300.962	303.446	264.059	279.693	317.97	314.065	333.202	293.947	0.182515	0.185479
ENSMUSG00000022433	Csnk1e	222.575	186.335	246.318	207.044	214.603	148.127	204.338	172.308	215.568	184.844	0.221719	0.185672
ENSMUSG00000043518	Rai2	89.2506	72.9971	112.651	97.497	107.743	70.8433	68.7772	43.9936	93.0988	72.8393	0.345395	0.185709
ENSMUSG00000044906	4930503L19Rik	84.8431	80.681	73.1388	50.3917	52.9885	64.403	61.7998	54.9919	72.2636	58.5458	0.304375	0.185715
ENSMUSG00000030643	Rab30	874.876	892.293	509.45	579.504	601.419	623.789	567.162	630.574	714.031	605.736	0.236767	0.18576
ENSMUSG00000037379	Spon2	514.568	568.609	456.487	936.628	465.416	691.872	306.008	298.179	619.073	440.369	0.490297	0.18586
ENSMUSG00000018411	Mapt	178.501	129.666	144.596	177.466	135.121	172.968	107.651	105.096	157.557	130.209	0.267381	0.185905
[truncated: 22,802 more rows]

## Sheet: Table S3
Table S3. The DEGs identified by transcriptome analysis
gene_id	gene_name	LP1	LP2	LP3	LP4	NP1	NP2	NP3	NP4	LP AVE	NP AVE	log2FoldChange	pvalue
ENSMUSG00000024526	Cidea	668.828	554.201	629.666	878.568	336.477	483.022	331.925	295.734	682.816	361.79	0.913825	5.98012e-07
ENSMUSG00000094345	Igkv14-126	5.50929	2.88146	1.68135	30.6732	0	0	0	0	10.1863	0	5.78329	3.80445e-05
ENSMUSG00000078673	Mup19	23.139	44.1824	52.1219	14.2411	39.7414	148.127	429.608	2320.66	33.4211	734.534	-4.45605	6.49696e-05
ENSMUSG00000076617	Ighm	327.252	238.201	266.494	417.375	213.72	128.806	211.315	157.644	312.33	177.871	0.80912	0.000144681
ENSMUSG00000031884	Ces2d-ps	51.7874	39.38	1.68135	10.9547	5.29885	3.68017	2.99031	0	25.9509	2.99233	3.06627	0.000215889
ENSMUSG00000038725	Pkhd1l1	34.1576	32.6566	31.9457	23.0049	16.7797	10.1205	11.9612	6.11022	30.4412	11.2429	1.41324	0.000287829
ENSMUSG00000074639	Rdh16f2	1133.81	1360.05	1170.22	1122.86	1491.63	1503.35	1550.97	1745.08	1196.74	1572.76	-0.393166	0.000305412
ENSMUSG00000074527	Gm14296	8.81487	7.6839	7.56608	14.2411	39.7414	19.3209	12.958	63.5463	9.5765	33.8916	-1.82361	0.00033558
ENSMUSG00000062328	Rpl17	1021.42	826.019	739.795	1859.02	615.55	716.713	611.02	645.239	1111.56	647.131	0.779676	0.000810167
ENSMUSG00000025887	Casp12	53.9911	61.4712	73.1388	55.869	29.1437	33.1215	34.887	41.5495	61.1175	34.6754	0.833291	0.000909965
ENSMUSG00000050533	Gm9845	46.2781	38.4195	11.7695	74.4921	14.1303	19.3209	10.9645	15.8866	42.7398	15.0755	1.49386	0.00131202
ENSMUSG00000025353	Ormdl2	495.836	438.943	443.877	441.475	663.239	540.985	567.162	581.693	455.033	588.27	-0.371726	0.00140299
ENSMUSG00000022129	Dct	45.1762	74.918	61.3694	43.8189	73.3008	94.7644	144.532	92.8753	56.3206	101.368	-0.840642	0.0014237
ENSMUSG00000076613	Ighg2b	55.0929	49.9454	51.2812	62.4419	59.1705	112.245	78.7449	166.198	54.6904	104.09	-0.922734	0.00158138
ENSMUSG00000024694	Keg1	1064.4	1067.1	1465.3	1163.39	1385.65	1339.58	2215.82	2236.34	1190.05	1794.35	-0.591433	0.0016284
ENSMUSG00000018623	Mmp7	28.6483	46.1034	58.8473	6.57283	7.06513	14.7207	11.9612	10.9984	35.043	11.1864	1.65841	0.00164956
ENSMUSG00000066607	6030419C18Rik	46.2781	22.0912	41.1931	53.6781	17.6628	28.5213	7.97416	12.2204	40.8101	16.5947	1.28016	0.00176269
ENSMUSG00000061848	Gm5805	195.029	200.742	233.708	139.125	314.398	264.972	237.231	303.067	192.151	279.917	-0.538648	0.0022506
ENSMUSG00000002831	Plin4	1671.52	1520.45	1577.95	2115.36	1095.1	1523.59	1229.02	1284.37	1721.32	1283.02	0.423612	0.00295883
ENSMUSG00000022797	Tfrc	493.633	502.335	396.799	407.515	491.027	556.626	871.177	680.678	450.071	649.877	-0.529504	0.00306253
ENSMUSG00000008845	Cd163	538.809	431.259	353.084	323.164	517.521	546.505	554.204	743.002	411.579	590.308	-0.519638	0.00364217
ENSMUSG00000053553	3110082I17Rik	69.4171	84.5229	97.5184	101.879	99.795	103.965	166.461	255.407	88.3343	156.407	-0.816546	0.00368102
ENSMUSG00000072940	Gm10443	214.862	262.213	224.461	269.486	173.096	170.208	183.406	199.193	242.756	181.476	0.422066	0.00369977
ENSMUSG00000001168	Oas1h	3.30558	0.960488	9.24744	2.19094	0	0	0	0	3.92611	0	4.4357	0.00386393
ENSMUSG00000024292	Cyp4f14	1818.07	1718.31	1878.07	2049.63	2418.93	2035.13	2336.43	2407.43	1866.02	2299.48	-0.301304	0.00386779
ENSMUSG00000078687	Mup8	0	2.88146	3.3627	2.19094	1.76628	4.60021	6.97739	47.6597	2.10878	15.2509	-2.80167	0.00391153
ENSMUSG00000113310	CT009546.1	6.61115	9.60488	0.840676	3.28641	0	0	0.99677	0	5.08578	0.249193	4.06455	0.00394414
ENSMUSG00000027574	Nkain4	19.8335	33.6171	19.3355	19.7185	16.7797	2.76013	4.98385	8.5543	23.1261	8.26949	1.47574	0.00409023
ENSMUSG00000112762	4930459C07Rik	14.3242	26.8937	11.7695	9.85924	4.41571	7.36034	5.98062	1.22204	15.7116	4.74468	1.69672	0.00426377
ENSMUSG00000070369	Itgad	3.30558	7.6839	6.72541	8.76377	0	0.920043	1.99354	0	6.61966	0.728396	3.16242	0.00446226
ENSMUSG00000021118	Plek2	11.0186	1.92098	10.0881	2.19094	27.3774	10.1205	26.9128	15.8866	6.30465	20.0743	-1.66503	0.00451853
ENSMUSG00000084067	Gm14269	16.5279	24.9727	22.6983	21.9094	22.9617	64.403	50.8353	35.4393	21.5271	43.4098	-1.00902	0.00498258
ENSMUSG00000104030	5330406M23Rik	7.71301	8.64439	3.3627	7.6683	0	0	2.99031	0	6.8471	0.747578	3.19036	0.00528208
ENSMUSG00000106375	Gm43361	5.50929	9.60488	4.20338	8.76377	0	1.84009	1.99354	0	7.02033	0.958406	2.83124	0.00541609
ENSMUSG00000072676	Tmem254a	2.20372	0.960488	2.52203	0	15.0134	7.36034	0.99677	13.4425	1.42156	9.20325	-2.65871	0.0056583
ENSMUSG00000040592	Cd79b	34.1576	47.0639	53.8033	35.0551	23.8448	26.6812	27.9096	12.2204	42.52	22.664	0.89926	0.00572258
ENSMUSG00000095320	Ccl21a	48.4818	22.0912	20.1762	15.3366	2.64942	6.4403	7.97416	20.7747	26.5215	9.45966	1.52625	0.0058866
ENSMUSG00000026158	Ogfrl1	188.418	228.596	201.762	194.994	225.201	241.971	309.996	353.171	203.443	282.585	-0.468969	0.00608919
ENSMUSG00000039814	Xkr5	5.50929	3.84195	1.68135	2.19094	0	0	0	0	3.30588	0	4.16265	0.00615175
ENSMUSG00000095134	Mid1-ps1	12.1204	3.84195	9.24744	4.38189	8.83142	13.8006	39.8708	24.4409	7.39793	21.7359	-1.54733	0.00647239
ENSMUSG00000032484	Ngp	0	9.60488	6.72541	2.19094	7.06513	24.8412	13.9548	21.9968	4.63031	16.9645	-1.82879	0.0066247
ENSMUSG00000036585	Fgf1	2903.4	2722.02	2569.11	2154.79	3495.47	2875.13	3052.11	3789.56	2587.33	3303.07	-0.35206	0.00679569
ENSMUSG00000109724	Gm18194	7.71301	7.6839	10.9288	6.57283	22.9617	20.2409	14.9516	18.3306	8.22463	19.1212	-1.20655	0.00685453
ENSMUSG00000042248	Cyp2c37	4333.61	4593.05	3771.27	3773.9	5683.9	3850.38	6158.05	6255.64	4117.96	5486.99	-0.413965	0.00732037
ENSMUSG00000016194	Hsd11b1	11994.8	11403.9	10365.5	10639.2	14501.2	11836.3	12984.9	14736.6	11100.9	13514.8	-0.283853	0.00733147
ENSMUSG00000074782	4833422C13Rik	24.2409	25.9332	18.4949	30.6732	42.3908	34.0416	49.8385	45.2156	24.8355	42.8716	-0.794	0.00735668
ENSMUSG00000029821	Gsdme	175.196	161.362	144.596	131.457	116.575	108.565	95.69	124.648	153.153	111.37	0.461274	0.00736179
ENSMUSG00000092008	Cyp2c69	3.30558	5.76293	1.68135	1.09547	17.6628	7.36034	21.9289	2.44409	2.96133	12.3491	-2.07074	0.00754758
ENSMUSG00000030934	Oat	25980.7	28937.6	31311.8	31606.5	36893.2	29516.8	41201.5	42755.6	29459.2	37591.8	-0.351662	0.00757584
ENSMUSG00000047728	BC025446	2028.52	2152.45	2232.84	1800.96	2446.3	2233.86	2677.33	2761.82	2053.69	2529.83	-0.300021	0.00796645
ENSMUSG00000022543	4930451G09Rik	6.61115	5.76293	3.3627	5.47736	14.1303	13.8006	8.97093	20.7747	5.30354	14.4191	-1.44922	0.00809778
ENSMUSG00000037280	Galnt6	84.8431	63.3922	78.1829	69.0147	50.3391	48.7623	55.8191	40.3274	73.8582	48.812	0.591391	0.00825894
ENSMUSG00000022347	A1bg	0	2.88146	1.68135	4.38189	9.71456	9.20043	18.9386	2.44409	2.23618	10.0744	-2.1869	0.00842727
ENSMUSG00000038576	Susd4	187.316	191.137	293.396	290.3	331.178	255.772	345.879	514.48	240.537	361.827	-0.585432	0.00864757
ENSMUSG00000096674	Mup15	1.10186	3.84195	2.52203	9.85924	6.18199	6.4403	10.9645	47.6597	4.33127	17.8116	-2.03428	0.00867034
ENSMUSG00000040268	Plekha1	521.179	470.639	397.64	546.64	287.904	432.42	388.74	340.95	484.025	362.504	0.415352	0.00895574
ENSMUSG00000104776	Gm43691	3.30558	10.5654	2.52203	12.0502	1.76628	0	0	2.44409	7.11079	1.05259	2.80986	0.00906654
ENSMUSG00000097690	4930505N22Rik	0	0	0	0	5.29885	0	3.98708	4.88817	0	3.54353	-4.271	0.00915758
ENSMUSG00000034593	Myo5a	62.8059	59.5502	90.793	41.6279	32.6762	34.9616	50.8353	32.9952	63.6943	37.8671	0.757166	0.00924499
ENSMUSG00000105703	Gm43305	374.632	336.171	522.901	593.746	495.442	563.066	1626.73	2210.68	456.862	1223.98	-1.42144	0.00934455
ENSMUSG00000004952	Rasa4	157.566	131.587	185.789	151.175	119.224	105.805	132.57	94.0973	156.529	112.924	0.469526	0.00960162
ENSMUSG00000032575	Manf	1594.39	1648.2	1312.3	1664.02	1644.41	1718.64	2095.21	3857.99	1554.73	2329.06	-0.582602	0.00988456
ENSMUSG00000029915	Clec5a	7.71301	18.2493	21.8576	19.7185	6.18199	7.36034	7.97416	6.11022	16.8846	6.90668	1.29621	0.0102593
ENSMUSG00000086212	Mkln1os	24.2409	21.1307	23.5389	19.7185	10.5977	8.28038	13.9548	10.9984	22.1573	10.9578	1.02158	0.0103828
ENSMUSG00000046070	Igfals	1830.19	1630.91	2137	1641.02	2785.43	2154.74	2353.37	1963.82	1809.78	2314.34	-0.354876	0.0104092
ENSMUSG00000086746	Gm15222	1.10186	5.76293	1.68135	2.19094	7.06513	10.1205	12.958	8.5543	2.68427	9.67448	-1.83796	0.0104872
ENSMUSG00000039364	Sectm1b	0	0.960488	8.40676	5.47736	0	0	0	0	3.71115	0	4.34994	0.0105004
ENSMUSG00000073565	Prr16	583.985	575.332	601.924	508.299	687.084	657.831	657.868	768.665	567.385	692.862	-0.286077	0.0107501
ENSMUSG00000058600	Rpl30	1952.49	1955.55	2133.64	1683.74	2842.83	2537.48	2241.74	2064.03	1931.36	2421.52	-0.3265	0.0108251
ENSMUSG00000037953	A4gnt	12.1204	17.2888	16.8135	21.9094	12.364	4.60021	6.97739	1.22204	17.033	6.29091	1.39489	0.011073
ENSMUSG00000024697	Gna14	60.6022	59.5502	87.4303	105.165	141.303	92.0043	112.635	124.648	78.187	117.648	-0.589046	0.0110982
ENSMUSG00000101389	Ms4a4a	23.139	18.2493	33.627	9.85924	4.41571	14.7207	8.97093	6.11022	21.2186	8.55439	1.31217	0.0111482
ENSMUSG00000019927	Ube2d1	175.196	172.888	182.427	161.034	113.925	153.647	127.587	128.315	172.886	130.868	0.402695	0.011208
ENSMUSG00000033066	Gas7	214.862	212.268	186.63	219.094	145.718	193.209	125.593	156.422	208.214	155.235	0.421098	0.0114532
ENSMUSG00000054263	Lifr	1391.65	1180.44	1370.3	1349.62	1337.96	1334.06	2163.99	2745.93	1323	1895.49	-0.518052	0.0117625
ENSMUSG00000031767	Nudt7	3141.4	3369.39	4715.35	4382.98	4746	3708.69	5940.75	8175.47	3902.28	5642.73	-0.531781	0.0118485
ENSMUSG00000064215	Ifi27	4105.53	3500.02	4225.24	3973.28	4901.44	4096.03	4949.96	5280.45	3951.01	4806.97	-0.282696	0.0118895
ENSMUSG00000027907	S100a11	361.41	373.63	409.409	409.706	267.592	389.178	271.122	189.417	388.539	279.327	0.472751	0.0119332
ENSMUSG00000112449	Srp54a	42.9725	47.0639	61.3694	40.5324	41.5077	56.1226	96.6867	173.53	47.9845	91.9618	-0.925484	0.0120313
ENSMUSG00000020484	Xbp1	3974.4	3372.27	3674.6	3234.93	3883.17	3969.98	4561.22	6473.16	3564.05	4721.89	-0.405492	0.0120362
ENSMUSG00000040322	Slc25a24	67.2134	63.3922	64.7321	67.9192	37.9751	43.242	54.8224	40.3274	65.8142	44.0917	0.576883	0.0120913
ENSMUSG00000043461	Sptssb	0	17.2888	13.4508	1.09547	0	0	0.99677	2.44409	7.95877	0.860214	3.34189	0.0122075
ENSMUSG00000086712	AI427809	13.2223	14.4073	19.3355	12.0502	4.41571	8.28038	7.97416	2.44409	14.7538	5.77859	1.33788	0.0123195
ENSMUSG00000072625	Gdf2	361.41	321.763	446.399	311.114	449.519	445.301	479.447	464.376	360.171	459.661	-0.349111	0.0126415
ENSMUSG00000094162	Ccl19-ps3	2.20372	2.88146	0	1.09547	5.29885	5.52026	5.98062	12.2204	1.54516	7.25504	-2.24831	0.0127425
ENSMUSG00000027938	Creb3l4	13.2223	9.60488	14.2915	6.57283	3.53257	5.52026	2.99031	2.44409	10.9229	3.62181	1.57829	0.012836
ENSMUSG00000076614	Ighg1	18.7316	33.6171	10.0881	55.869	43.2739	62.5629	68.7772	271.294	29.5765	111.477	-1.91485	0.012925
ENSMUSG00000028240	Cyp7a1	2464.86	3464.48	2447.21	2250.1	1374.17	2350.71	2383.28	1162.16	2656.66	1817.58	0.547336	0.0130924
ENSMUSG00000024542	Cep192	84.8431	87.4044	83.2269	93.1151	38.8582	46.0021	83.7287	59.8801	87.1474	57.1173	0.615151	0.0132996
ENSMUSG00000024538	Ppic	99.1673	128.705	123.579	121.597	93.613	83.7239	95.69	68.4344	118.262	85.3653	0.46649	0.0133653
ENSMUSG00000006517	Mvd	144.343	162.322	126.942	165.416	237.565	206.09	232.247	144.201	149.756	205.026	-0.459685	0.0134495
ENSMUSG00000020738	Sumo2	119.001	72.9971	71.4575	66.8238	169.563	56.1226	594.075	227.3	82.5698	261.765	-1.66489	0.0134661
ENSMUSG00000020297	Nsg2	2.20372	2.88146	5.04406	1.09547	0	0	0	0	2.80618	0	3.95132	0.0134822
ENSMUSG00000056481	Cd248	31.9539	29.7751	33.627	30.6732	24.728	15.6407	12.958	17.1086	31.5073	17.6088	0.83301	0.0136469
ENSMUSG00000035780	Ugt2a3	3701.14	3664.26	4002.46	3708.17	4424.54	3734.45	5136.36	5394.1	3769.01	4672.36	-0.309605	0.0138919
ENSMUSG00000032231	Anxa2	1355.29	1510.85	1505.65	1899.55	1113.64	1482.19	1259.92	866.429	1567.83	1180.54	0.408362	0.0139325
ENSMUSG00000048538	Gm9826	2106.75	1787.47	2058.82	1574.19	2618.52	2191.54	2199.87	2266.89	1881.81	2319.2	-0.301461	0.0145126
ENSMUSG00000043773	1700048O20Rik	4.40743	3.84195	1.68135	2.19094	6.18199	10.1205	11.9612	9.77635	3.03042	9.51001	-1.66359	0.0147828
ENSMUSG00000083396	Gm15542	308.52	326.566	290.874	291.395	370.919	302.694	435.589	472.931	304.339	395.533	-0.37544	0.0152343
ENSMUSG00000027454	Gins1	44.0743	47.0639	73.9795	65.7283	105.094	67.1631	95.69	80.6549	57.7115	87.1504	-0.591156	0.0154385
ENSMUSG00000028664	Ephb2	291.993	112.377	158.047	269.486	126.289	189.529	101.671	80.6549	207.976	124.536	0.733474	0.0154582
ENSMUSG00000019906	Lin7a	309.622	310.238	295.077	360.41	397.414	320.175	454.527	469.265	318.837	410.345	-0.363025	0.0157013
ENSMUSG00000065489	Mir365-2	5.50929	0.960488	3.3627	9.85924	0	0	0.99677	1.22204	4.92293	0.554703	3.26914	0.0157164
ENSMUSG00000023905	Tnfrsf12a	467.188	329.447	306.847	351.646	287.904	332.135	242.215	200.415	363.782	265.667	0.44845	0.0157238
ENSMUSG00000024378	Stard4	747.06	924.95	937.354	850.086	1005.9	932.923	1269.89	1102.28	864.862	1077.75	-0.31621	0.0157347
ENSMUSG00000060560	Ces4a	8.81487	6.72341	9.24744	13.1457	9.71456	15.6407	18.9386	48.8817	9.48284	23.2939	-1.28026	0.0157493
ENSMUSG00000109119	Gm44752	2.20372	1.92098	4.20338	2.19094	0	0	0	0	2.62975	0	3.85126	0.0158568
ENSMUSG00000087484	2900089D17Rik	51.7874	40.3405	43.7152	76.683	45.0402	28.5213	18.9386	30.5511	53.1315	30.7628	0.777209	0.0161171
ENSMUSG00000021135	Slc10a1	12495.1	12233.7	10291.6	12248.5	12612.1	13818.1	14957.5	14940.7	11817.2	14082.1	-0.252993	0.0161643
ENSMUSG00000024131	Slc3a1	663.319	598.384	300.121	576.218	582.873	690.032	790.439	1077.84	534.511	785.297	-0.555193	0.0165247
ENSMUSG00000023176	Cpn2	5864.09	5215.45	5124.76	5259.36	5674.19	6231.45	6372.35	7549.78	5365.92	6456.94	-0.266862	0.0169665
ENSMUSG00000027075	Slc43a1	52.8892	51.8663	45.3965	38.3415	62.7031	39.5618	94.6932	122.204	47.1234	79.7906	-0.750474	0.0170436
ENSMUSG00000020649	Rrm2	82.6394	99.8907	100.04	79.9694	61.8199	83.7239	44.8547	57.436	90.635	61.9586	0.54748	0.0172246
ENSMUSG00000081070	Gm13181	2.20372	0.960488	7.56608	3.28641	0	0	0.99677	0	3.50418	0.249193	3.55034	0.0173402
ENSMUSG00000099889	Mrgprb11-ps	79.3338	114.298	85.749	105.165	71.5345	78.2036	36.8805	68.4344	96.1365	63.7633	0.590761	0.0173825
ENSMUSG00000054827	Cyp2c50	4634.42	6151.92	6378.21	5912.26	8250.31	5058.39	8277.18	9063.89	5769.2	7662.44	-0.409256	0.0179182
ENSMUSG00000059060	Rad51b	381.243	419.733	369.057	488.58	309.983	404.819	286.073	272.516	414.653	318.348	0.378109	0.0179199
ENSMUSG00000006154	Eps8l1	159.77	107.575	62.21	46.0098	52.9885	35.8817	44.8547	76.9887	93.891	52.6784	0.838307	0.0180056
ENSMUSG00000028410	Dnaja1	7992.88	7987.42	7368.53	7742.79	8335.97	8311.67	9797.26	12128.8	7772.9	9643.42	-0.310929	0.0180608
ENSMUSG00000022995	Enah	44.0743	26.8937	39.5118	26.2913	19.4291	26.6812	13.9548	17.1086	34.1928	19.2934	0.818654	0.0185172
ENSMUSG00000070811	Sult2a2	6.61115	2.88146	1.68135	2.19094	0	0	0.99677	0	3.34123	0.249193	3.45181	0.0188726
ENSMUSG00000071177	Serpina1d	26712.4	29129.7	26092.1	28728.7	30313	28203.9	36162.8	46399.8	27665.7	35269.9	-0.350293	0.0189774
ENSMUSG00000049436	Upk1b	25.3428	16.3283	11.7695	12.0502	13.2471	5.52026	2.99031	3.66613	16.3727	6.35596	1.32677	0.0192658
ENSMUSG00000032115	Hyou1	2072.6	1782.67	1462.78	2075.92	1918.18	2068.26	2258.68	4618.1	1848.49	2715.81	-0.55473	0.0193016
ENSMUSG00000034110	Kctd7	51.7874	40.3405	60.5287	51.4872	81.249	71.7633	73.761	65.9903	51.0359	73.1909	-0.520786	0.0194254
ENSMUSG00000045094	Arhgef37	154.26	141.192	168.135	167.607	204.889	173.888	209.322	218.746	157.799	201.711	-0.351583	0.0194328
ENSMUSG00000070942	Il1rl2	15.426	14.4073	18.4949	7.6683	7.94827	8.28038	2.99031	2.44409	13.9991	5.41576	1.3423	0.0195979
ENSMUSG00000038599	Capn8	19.8335	24.0122	9.24744	14.2411	15.0134	10.1205	44.8547	102.652	16.8336	43.16	-1.34992	0.019647
ENSMUSG00000106443	Gm42702	1.10186	1.92098	6.72541	1.09547	0	0	0	0	2.71093	0	3.90912	0.0196738
ENSMUSG00000086332	4930480G23Rik	53.9911	64.3527	52.9626	66.8238	70.6513	84.6439	72.7642	122.204	59.5325	87.566	-0.549548	0.0197033
ENSMUSG00000028051	Hcn3	1080.92	463.916	622.1	660.569	415.96	694.632	430.605	356.837	706.877	474.508	0.573315	0.0197587
ENSMUSG00000015568	Lpl	586.189	785.679	905.408	645.233	581.107	587.907	617.998	317.731	730.627	526.186	0.472598	0.0200722
ENSMUSG00000029177	Cenpa	73.8245	96.0488	88.271	89.8287	67.1188	57.9627	68.7772	57.436	86.9932	62.8237	0.468926	0.0202858
ENSMUSG00000028179	Cth	7778.02	7301.63	7244.11	6190.51	7693.05	7535.15	10014.6	9951.1	7128.57	8798.46	-0.303482	0.0204674
ENSMUSG00000028488	Sh3gl2	0	0	0	0	0	2.76013	2.99031	6.11022	0	2.96516	-3.99863	0.0207561
ENSMUSG00000078780	Gm5150	29.7502	37.459	38.6711	26.2913	12.364	28.5213	19.9354	13.4425	33.0429	18.5658	0.829232	0.0208432
ENSMUSG00000103502	9330121J05Rik	5.50929	2.88146	6.72541	3.28641	10.5977	11.0405	9.9677	15.8866	4.60064	11.8731	-1.34298	0.020858
ENSMUSG00000079083	Jrkl	89.2506	78.76	82.3863	56.9645	50.3391	43.242	67.7804	48.8817	76.8403	52.5608	0.550298	0.0209208
ENSMUSG00000027579	Srms	13.2223	18.2493	10.9288	26.2913	11.4808	6.4403	4.98385	7.33226	17.1729	7.55931	1.16575	0.0210992
ENSMUSG00000085819	Ube4bos1	12.1204	3.84195	4.20338	6.57283	1.76628	0	1.99354	2.44409	6.68465	1.55098	2.13235	0.021166
ENSMUSG00000028496	Mllt3	69.4171	64.3527	71.4575	63.5374	37.0919	45.0821	60.803	41.5495	67.1911	46.1316	0.544268	0.0212268
ENSMUSG00000062991	Nrg1	66.1115	42.2615	33.627	59.1555	22.9617	43.242	29.9031	23.2188	50.2889	29.8314	0.738604	0.021242
ENSMUSG00000071178	Serpina1b	78594.5	96511.7	80683.9	89168.1	89630.9	96875.9	109522	129423	86239.5	106363	-0.30256	0.0216327
ENSMUSG00000026976	Pax8	5.50929	1.92098	1.68135	1.09547	6.18199	8.28038	9.9677	8.5543	2.55177	8.2461	-1.71589	0.0216566
ENSMUSG00000087136	Gm15864	4.40743	3.84195	0	3.28641	0	0	0	0	2.88395	0	3.96103	0.0219281
ENSMUSG00000027333	Smox	262.242	213.228	225.301	215.808	180.161	204.249	180.415	157.644	229.145	180.617	0.33881	0.0222846
ENSMUSG00000027661	Slc2a10	11.0186	4.80244	10.0881	13.1457	1.76628	3.68017	5.98062	1.22204	9.7637	3.16228	1.60439	0.0223193
ENSMUSG00000037493	Cib2	91.4543	84.5229	138.712	109.547	164.264	139.846	139.548	134.425	106.059	144.521	-0.443605	0.0223863
ENSMUSG00000083899	Gm12346	101.371	84.5229	66.4134	78.874	66.2356	117.765	146.525	179.64	82.7953	127.542	-0.620066	0.0225763
ENSMUSG00000067144	Slc22a7	191.723	161.362	258.088	208.14	308.216	189.529	369.802	669.68	204.828	384.307	-0.905992	0.0230232
ENSMUSG00000045629	Sh3tc2	34.1576	34.5776	42.0338	33.9596	22.0785	23.9211	24.9193	19.5527	36.1821	22.6179	0.677546	0.0231035
ENSMUSG00000023050	Map3k12	47.3799	43.2219	44.5558	43.8189	28.2605	27.6013	36.8805	23.2188	44.7441	28.9903	0.619978	0.0231223
ENSMUSG00000092075	Serpina4-ps1	15.426	8.64439	32.7864	27.3868	8.83142	23.9211	47.845	432.603	21.0609	128.3	-2.60445	0.0233877
ENSMUSG00000035725	Prkx	115.695	143.113	142.074	113.929	93.613	100.285	101.671	97.7635	128.703	98.3329	0.392929	0.0233954
ENSMUSG00000079015	Serpina1c	7890.41	10162	8327.74	8182.08	8764.3	8338.35	12675.9	18364.9	8640.55	12035.9	-0.478009	0.0235551
ENSMUSG00000040899	Ccr6	2.20372	3.84195	10.0881	3.28641	0.883142	1.84009	0	0	4.85505	0.680807	2.76783	0.0237661
ENSMUSG00000028427	Aqp7	35.2595	16.3283	23.5389	26.2913	7.06513	23.9211	10.9645	2.44409	25.3545	11.0987	1.16349	0.0238078
ENSMUSG00000080237	Gm14239	0	2.88146	0.840676	0	5.29885	0.920043	16.9451	2.44409	0.930535	6.40202	-2.73486	0.0240471
ENSMUSG00000039648	Kyat1	1162.46	1372.54	1225.71	1324.43	1555.21	1274.26	1544.99	1839.18	1271.28	1553.41	-0.288306	0.0244187
ENSMUSG00000100075	1700018L02Rik	61.7041	35.538	52.1219	36.1506	56.5211	55.2026	113.632	69.6565	46.3787	73.753	-0.667228	0.0244765
ENSMUSG00000026580	Selp	48.4818	62.4317	55.4846	51.4872	38.8582	32.2015	36.8805	41.5495	54.4713	37.3724	0.551097	0.0251128
ENSMUSG00000030382	Slc27a5	19153.6	17292.6	17694.6	19336.2	20873.9	19229.8	22039.6	22996.4	18369.2	21284.9	-0.212527	0.0252378
ENSMUSG00000018379	Srsf1	73.8245	63.3922	60.5287	64.6328	68.0019	58.8827	215.302	102.652	65.5946	111.21	-0.760926	0.0256769
ENSMUSG00000019579	Mydgf	1396.05	1406.15	1351.81	1470.12	1776	1600.87	1468.24	1709.64	1406.03	1638.69	-0.221132	0.0257405
ENSMUSG00000056665	Them6	291.993	215.149	261.45	289.204	235.799	215.29	201.348	174.752	264.449	206.797	0.349285	0.0260457
ENSMUSG00000004552	Ctse	57.2967	46.1034	69.7761	62.4419	31.7931	46.9222	42.8611	37.8833	58.9045	39.8649	0.56525	0.0260864
ENSMUSG00000062157	Ifnlr1	6.61115	11.5259	7.56608	9.85924	1.76628	0.920043	1.99354	7.33226	8.89058	3.00303	1.64582	0.026164
ENSMUSG00000030711	Sult1a1	7730.64	8220.81	6112.56	6002.09	8252.96	8728.44	7720.98	9726.24	7016.52	8607.16	-0.29473	0.0261845
ENSMUSG00000038174	Fam126b	576.272	552.28	532.989	589.364	480.429	629.309	902.077	1092.51	562.726	776.081	-0.462343	0.0264029
ENSMUSG00000090555	Gm8893	267.752	428.378	295.077	315.496	377.101	363.417	441.569	549.919	326.676	433.002	-0.403575	0.0264297
ENSMUSG00000112249	Gm30262	262.242	212.268	199.24	167.607	242.864	214.37	293.05	425.271	210.339	293.889	-0.479166	0.0264418
ENSMUSG00000082039	Gm15653	4.40743	0.960488	3.3627	3.28641	14.1303	3.68017	8.97093	9.77635	3.00426	9.13943	-1.61703	0.0264888
ENSMUSG00000028195	Cyr61	236.9	247.806	217.735	254.149	234.033	152.727	181.412	175.974	239.147	186.037	0.359116	0.0265207
ENSMUSG00000105512	Gm43714	16.5279	14.4073	10.0881	24.1004	25.6111	28.5213	32.8934	25.6629	16.2809	28.1722	-0.810336	0.0268474
ENSMUSG00000115111	AC139758.2	4.40743	3.84195	0	5.47736	0.883142	0	0	0	3.43169	0.220785	3.48696	0.02687
ENSMUSG00000103138	Gm2238	8.81487	3.84195	2.52203	8.76377	0	0.920043	2.99031	1.22204	5.98566	1.2831	2.23386	0.0269939
ENSMUSG00000057880	Abat	8508.55	8712.58	9687.95	8105.39	10295.7	10172.9	9665.68	10051.3	8753.62	10046.4	-0.198601	0.027247
ENSMUSG00000040998	Npnt	40.7688	24.9727	23.5389	48.2007	16.7797	25.7612	17.9419	18.3306	34.3703	19.7034	0.78854	0.0273399
ENSMUSG00000023345	Poc1a	50.6855	56.6688	73.9795	56.9645	112.159	66.2431	81.7352	81.8769	59.5746	85.5035	-0.517406	0.0274507
ENSMUSG00000009092	Derl3	66.1115	48.0244	33.627	38.3415	63.5862	32.2015	104.661	123.426	46.5261	80.9687	-0.796563	0.0275433
ENSMUSG00000021379	Id4	169.686	129.666	143.756	135.838	134.238	114.085	96.6867	86.7651	144.737	107.944	0.414837	0.0275992
ENSMUSG00000041355	Ssr2	1415.89	1295.7	1282.87	1412.06	1517.24	1503.35	1539.01	1686.42	1351.63	1561.51	-0.208175	0.0276162
ENSMUSG00000019768	Esr1	163.075	219.952	179.905	177.466	194.291	226.33	220.286	395.942	185.099	259.212	-0.480213	0.0276337
ENSMUSG00000044949	Ubtd2	22.0372	26.8937	26.061	26.2913	18.546	11.0405	13.9548	14.6645	25.3208	14.5514	0.799123	0.0277377
ENSMUSG00000030790	Adm	30.852	19.2098	26.061	25.1958	38.8582	42.322	37.8773	37.8833	25.3297	39.2352	-0.637006	0.0277397
ENSMUSG00000111394	AC160637.1	27.5465	24.0122	26.9016	41.6279	12.364	20.2409	17.9419	19.5527	30.0221	17.5249	0.778028	0.0278172
ENSMUSG00000038248	Sobp	13.2223	5.76293	9.24744	9.85924	1.76628	7.36034	0	2.44409	9.52298	2.89268	1.69465	0.0279772
ENSMUSG00000082644	Mup-ps19	1259.42	2164.94	2015.1	3211.92	5669.77	3063.74	1880.91	9860.67	2162.85	5118.77	-1.24282	0.028013
ENSMUSG00000078247	Airn	34.1576	33.6171	19.3355	43.8189	21.1954	16.5608	21.9289	15.8866	32.7323	18.8929	0.776942	0.0280821
ENSMUSG00000048087	Gm4737	11337	9415.66	10523.6	7944.36	12962.8	10949.4	11206.7	12429.4	9805.16	11887.1	-0.277739	0.0281575
ENSMUSG00000081958	Gm11594	0	0.960488	2.52203	1.09547	3.53257	7.36034	5.98062	4.88817	1.1445	5.44043	-2.17985	0.0283498
ENSMUSG00000025810	Nrp1	1256.12	981.618	1121.46	1221.45	1218.74	1078.29	1636.7	2296.22	1145.16	1557.49	-0.44295	0.0284174
ENSMUSG00000025006	Sorbs1	1112.88	1136.26	1225.71	1313.47	984.703	1144.53	1009.73	827.323	1197.08	991.572	0.270541	0.0284772
ENSMUSG00000053219	Raet1e	84.8431	104.693	123.579	115.025	60.0536	87.4041	94.6932	67.2124	107.035	77.3408	0.470606	0.0289271
ENSMUSG00000024222	Fkbp5	1505.14	1290.9	981.91	679.192	1362.69	1567.75	1235	2039.59	1114.28	1551.26	-0.476975	0.0293794
ENSMUSG00000029683	Lmod2	7.71301	6.72341	10.9288	2.19094	7.94827	15.6407	23.9225	17.1086	6.88904	16.155	-1.19991	0.029438
ENSMUSG00000029648	Flt1	249.02	211.307	215.213	211.426	235.799	282.453	284.08	290.846	221.742	273.294	-0.300838	0.0295293
ENSMUSG00000087440	4930577N17Rik	19.8335	16.3283	18.4949	26.2913	9.71456	11.0405	14.9516	6.11022	20.237	10.4542	0.933642	0.0296847
ENSMUSG00000085596	Gm11476	3.30558	6.72341	2.52203	8.76377	1.76628	0	0	2.44409	5.3287	1.05259	2.39117	0.0297339
ENSMUSG00000053646	Plxnb1	1315.62	1052.69	1186.19	1104.24	1303.52	1688.28	1430.37	1235.49	1164.69	1414.41	-0.280979	0.0298777
ENSMUSG00000112397	Gm10824	2.20372	0	5.04406	3.28641	0	0	0	0	2.63355	0	3.84975	0.0299527
ENSMUSG00000071550	Cfap44	11.0186	1.92098	4.20338	3.28641	0	0	2.99031	0	5.10734	0.747578	2.76377	0.0300727
ENSMUSG00000115082	AC156016.2	0	0	0	0	0.883142	0.920043	2.99031	4.88817	0	2.42042	-3.70111	0.0300882
ENSMUSG00000004931	Apba3	1679.23	1239.03	1495.56	1467.93	1949.98	2047.09	1535.03	1657.09	1470.44	1797.3	-0.290276	0.0300938
ENSMUSG00000042985	Upk3b	74.9264	145.034	104.244	67.9192	95.3793	68.0832	32.8934	41.5495	98.0308	59.4763	0.715704	0.0301039
ENSMUSG00000054404	Slfn5	410.993	454.311	523.741	441.475	352.374	404.819	407.679	343.394	457.63	377.066	0.280163	0.0301762
ENSMUSG00000097347	Gm17275	16.5279	9.60488	9.24744	7.6683	17.6628	12.8806	27.9096	25.6629	10.7621	21.029	-0.965095	0.0303485
ENSMUSG00000020644	Id2	2110.06	2177.43	2254.69	1346.33	2350.92	2091.26	2684.3	3116.21	1972.13	2560.67	-0.376104	0.0304586
ENSMUSG00000030641	Ddias	17.6297	20.1702	16.8135	20.814	8.83142	8.28038	3.98708	17.1086	18.8569	9.55187	1.00926	0.0304641
ENSMUSG00000028069	Gpatch4	236.9	211.307	198.4	182.944	248.163	253.012	242.215	279.848	207.388	255.809	-0.30171	0.0307698
ENSMUSG00000040247	Tbc1d10c	5.50929	12.4863	4.20338	5.47736	2.64942	0.920043	1.99354	2.44409	6.91909	2.00177	1.80024	0.0308586
ENSMUSG00000046415	B430212C06Rik	70.519	54.7478	70.6168	64.6328	37.0919	46.0021	62.7965	26.885	65.1291	43.1939	0.584893	0.0308686
ENSMUSG00000086308	G630016G05Rik	3.30558	3.84195	5.88473	4.38189	0	1.84009	0.99677	0	4.35354	0.709214	2.57589	0.0309454
ENSMUSG00000022439	Parvg	78.232	76.839	131.986	98.5924	75.9502	65.323	78.7449	46.4376	96.4124	66.6139	0.53093	0.0311637
ENSMUSG00000093599	Mir5620	14.3242	9.60488	6.72541	25.1958	8.83142	6.4403	2.99031	3.66613	13.9626	5.48204	1.30914	0.031254
ENSMUSG00000062960	Kdr	969.636	882.688	1002.09	999.07	1089.8	1113.25	1129.34	1096.17	963.37	1107.14	-0.20075	0.0320343
ENSMUSG00000089983	2010320O07Rik	4.40743	0	1.68135	4.38189	0	0	0	0	2.61767	0	3.82037	0.0321066
ENSMUSG00000096586	Gm22918	1.10186	1.92098	1.68135	0	3.53257	6.4403	3.98708	7.33226	1.17605	5.32305	-2.12144	0.0321085
ENSMUSG00000074771	Ankef1	4.40743	3.84195	0	2.19094	0	0	0	0	2.61008	0	3.81813	0.0322836
ENSMUSG00000021340	Gpld1	4282.92	3404.93	3791.45	3681.88	4882.89	4115.35	4479.49	4282.04	3790.3	4439.94	-0.228458	0.032375
ENSMUSG00000003190	Bcl2l12	114.593	86.4439	115.173	96.4015	172.213	123.286	127.587	123.426	103.153	136.628	-0.408086	0.0324141
ENSMUSG00000018821	Avpi1	696.375	666.578	795.28	628.801	983.82	872.2	726.646	801.66	696.758	846.082	-0.280043	0.0324588
ENSMUSG00000028995	Fam126a	418.706	463.916	394.277	449.143	350.607	423.22	333.918	237.076	431.511	336.205	0.356121	0.0325947
ENSMUSG00000048782	Insc	182.909	195.939	232.027	276.059	294.969	258.532	239.225	370.279	221.733	290.751	-0.388429	0.0330899
ENSMUSG00000038135	Crygn	48.4818	48.9849	65.5727	71.2057	96.2624	66.2431	85.7222	79.4328	58.5613	81.9151	-0.484057	0.0333296
ENSMUSG00000029656	C8b	1522.77	1397.51	1335.83	1282.8	1453.65	1607.31	2193.89	4570.44	1384.73	2456.32	-0.826645	0.0334839
ENSMUSG00000076587	Igkv6-20	4.40743	0.960488	0	5.47736	0	0	0	0	2.71132	0	3.86547	0.0336616
ENSMUSG00000027712	Anxa5	4614.58	5080.02	4607.75	4869.37	4301.78	4685.78	3612.3	2820.48	4792.93	3855.08	0.31374	0.033774
ENSMUSG00000021211	Akr1c12	1353.08	1660.68	1787.28	1592.82	1962.34	1749	1858.98	1979.71	1598.46	1887.51	-0.238935	0.0338259
ENSMUSG00000031538	Plat	48.4818	34.5776	68.9354	65.7283	31.7931	40.4819	41.8644	26.885	54.4308	35.2561	0.622547	0.0341816
ENSMUSG00000041828	Abca8a	853.941	731.892	976.025	993.593	844.283	1065.41	1384.51	1220.82	888.862	1128.76	-0.344029	0.0342843
ENSMUSG00000103693	Gm37529	3.30558	6.72341	1.68135	6.57283	0	0	1.99354	1.22204	4.57079	0.803896	2.5737	0.0343043
ENSMUSG00000030505	Prmt3	164.177	174.809	131.145	151.175	115.692	127.886	122.603	122.204	155.327	122.096	0.345321	0.0343084
ENSMUSG00000103270	Gm37915	1.10186	2.88146	2.52203	2.19094	0	0	0	0	2.17407	0	3.57413	0.0343597
ENSMUSG00000037210	Fam193a	345.984	365.946	322.82	363.697	280.839	249.332	291.057	332.396	349.611	288.406	0.280217	0.0343791
ENSMUSG00000028780	Sema3c	38.5651	45.1429	32.7864	24.1004	22.0785	27.6013	9.9677	23.2188	35.1487	20.7166	0.763309	0.0344867
ENSMUSG00000040724	Kcna2	112.39	144.073	115.173	107.356	83.8985	93.8444	109.645	70.8785	119.748	89.5665	0.416238	0.0345929
ENSMUSG00000005043	Sgsh	210.455	164.243	208.488	242.099	178.395	182.168	142.538	131.981	206.321	158.77	0.371845	0.034681
ENSMUSG00000103089	Gm38118	12.1204	0.960488	1.68135	2.19094	0	0.920043	0.99677	0	4.23831	0.479203	3.06431	0.034686
ENSMUSG00000065126	Snord104	31.9539	37.459	30.2643	32.8641	44.1571	36.8017	57.8127	59.8801	33.1354	49.6629	-0.576082	0.0347092
ENSMUSG00000022066	Entpd4b	12.1204	32.6566	11.7695	16.4321	22.0785	46.0021	31.8967	31.7731	18.2446	32.9376	-0.850604	0.0347819
ENSMUSG00000041747	Utp15	190.622	189.216	159.728	185.135	189.875	211.61	248.196	262.739	181.175	228.105	-0.330378	0.0348576
ENSMUSG00000026200	Glb1l	96.9636	97.9697	77.3422	88.7332	79.4827	53.3625	69.7739	62.3242	90.2522	66.2358	0.441174	0.0349255
ENSMUSG00000049723	Mmp12	300.807	287.186	380.826	369.174	197.824	335.816	284.08	162.532	334.498	245.063	0.44656	0.0349336
ENSMUSG00000015363	Trabd	2160.74	1823.01	2156.33	2029.91	2691.82	2320.35	2074.28	2600.51	2042.5	2421.74	-0.245636	0.0349408
ENSMUSG00000000340	Dbt	1607.61	1706.79	1742.72	1538.04	1732.72	1737.96	2132.09	2274.22	1648.79	1969.25	-0.255187	0.0349551
ENSMUSG00000097230	Gm26853	0	0	0	1.09547	0.883142	0.920043	7.97416	2.44409	0.273868	3.05536	-3.33478	0.0349736
ENSMUSG00000115819	AC108858.2	48.4818	42.2615	52.9626	51.4872	59.1705	69.0032	79.7416	63.5463	48.7982	67.8654	-0.475128	0.035011
ENSMUSG00000114438	AC154767.2	7.71301	9.60488	3.3627	9.85924	1.76628	3.68017	1.99354	2.44409	7.63496	2.47102	1.61365	0.0350419
ENSMUSG00000097354	2310001H17Rik	192.825	181.532	165.613	210.331	222.552	196.889	239.225	295.734	187.575	238.6	-0.345245	0.0353845
ENSMUSG00000054493	Gm9947	0	0.960488	0	0	0	3.68017	1.99354	7.33226	0.240122	3.25149	-3.40601	0.0353987
ENSMUSG00000056162	Cndp1	13.2223	26.8937	16.8135	32.8641	15.8965	8.28038	12.958	9.77635	22.4484	11.7278	0.925242	0.0354811
ENSMUSG00000110935	Gm8834	33.0558	31.6961	29.4237	51.4872	19.4291	28.5213	24.9193	15.8866	36.4157	22.1891	0.698571	0.0356275
ENSMUSG00000015083	C8g	6610.05	7602.26	7576.17	7839.19	8217.63	7875.57	8695.82	9764.13	7406.92	8638.29	-0.221663	0.0357242
ENSMUSG00000051344	Plekhm3	73.8245	78.76	79.0236	86.5423	66.2356	55.2026	43.8579	67.2124	79.5376	58.1271	0.454781	0.0358142
ENSMUSG00000024011	Pi16	23.139	22.0912	38.6711	13.1457	7.94827	18.4009	13.9548	10.9984	24.2618	12.8256	0.929369	0.0358646
ENSMUSG00000057228	Aadat	1365.2	1459.94	1440.92	1356.19	1541.08	1361.66	1932.74	2038.37	1405.56	1718.46	-0.289001	0.0358935
ENSMUSG00000053111	Fank1	5.50929	0.960488	1.68135	3.28641	0	0	0.99677	0	2.85939	0.249193	3.22293	0.0359187
ENSMUSG00000071497	Nutf2-ps1	29.7502	70.1156	41.1931	73.3966	25.6111	37.7217	26.9128	42.7715	53.6139	33.2543	0.695563	0.0361915
ENSMUSG00000050945	Zfp438	30.852	25.9332	42.8745	38.3415	41.5077	52.4424	61.7998	50.1038	34.5003	51.4634	-0.571019	0.0361932
ENSMUSG00000057425	Ugt2b37	79.3338	45.1429	59.688	100.783	75.9502	88.3241	126.59	130.759	71.237	105.406	-0.566741	0.0362488
ENSMUSG00000105449	Gm43379	34.1576	22.0912	13.4508	21.9094	14.1303	10.1205	11.9612	13.4425	22.9023	12.4136	0.873669	0.0363396
ENSMUSG00000018796	Acsl1	22768.8	24479	25233.7	22782.5	27153.1	23994.7	30410.5	28962.4	23816	27630.2	-0.214254	0.0365942
ENSMUSG00000027597	Ahcy	51862.3	47781.4	49571.3	37110.2	59207.6	50562.8	53359.1	59850.8	46581.3	55745.1	-0.259076	0.0366582
ENSMUSG00000073802	Cdkn2b	15.426	10.5654	7.56608	12.0502	5.29885	4.60021	5.98062	3.66613	11.4019	4.88645	1.19935	0.0369475
ENSMUSG00000024029	Tff3	12.1204	16.3283	13.4508	18.623	15.0134	50.6023	12.958	40.3274	15.1306	29.7253	-0.97096	0.0372278
ENSMUSG00000032083	Apoa1	121618	126438	118669	136683	129103	146174	142674	175681	125852	148408	-0.237833	0.0372666
ENSMUSG00000083355	Gm11581	2.20372	5.76293	4.20338	2.19094	0	0.920043	0.99677	0	3.59024	0.479203	2.85832	0.0372753
ENSMUSG00000034773	BC030867	3.30558	3.84195	12.6101	5.47736	2.64942	0.920043	0.99677	2.44409	6.30876	1.75258	1.87966	0.0375527
ENSMUSG00000079608	Stard6	1.10186	0.960488	0	0	3.53257	6.4403	1.99354	2.44409	0.515587	3.60262	-2.85985	0.0377567
ENSMUSG00000113775	CT025604.1	0	0.960488	0.840676	0	2.64942	9.20043	1.99354	1.22204	0.450291	3.76636	-2.96186	0.0379633
ENSMUSG00000028362	Tnfsf8	0	0.960488	0.840676	0	3.53257	3.68017	1.99354	4.88817	0.450291	3.52361	-2.83706	0.0381721
ENSMUSG00000108912	E230020D15Rik	3.30558	2.88146	3.3627	0	0	0	0	0	2.38744	0	3.71041	0.0381953
ENSMUSG00000087231	E230016M11Rik	13.2223	22.0912	18.4949	19.7185	12.364	7.36034	9.9677	9.77635	18.3817	9.86709	0.899132	0.0383275
ENSMUSG00000031995	St14	39.6669	32.6566	66.4134	30.6732	27.3774	28.5213	29.9031	19.5527	42.3525	26.3386	0.687399	0.0383975
ENSMUSG00000015451	C4a	813.172	613.752	667.497	718.629	728.592	704.753	1376.54	2345.1	703.262	1288.75	-0.873487	0.0384206
ENSMUSG00000060962	Dmkn	4.40743	4.80244	2.52203	4.38189	0.883142	0.920043	0.99677	0	4.02845	0.699989	2.45314	0.0385617
ENSMUSG00000029369	Afm	2283.05	2413.71	2189.96	2412.23	2322.66	2528.28	3152.78	3068.55	2324.74	2768.07	-0.251462	0.038577
ENSMUSG00000099009	Rdh16f1	0	1.92098	0	1.09547	9.71456	8.28038	1.99354	0	0.754112	4.99712	-2.76358	0.0386362
ENSMUSG00000104367	Gm38079	12.1204	9.60488	12.6101	7.6683	19.4291	21.161	24.9193	12.2204	10.5009	19.4324	-0.890983	0.038726
ENSMUSG00000080935	Got2-ps1	38.5651	46.1034	58.0066	55.869	72.4176	79.1237	57.8127	68.4344	49.636	69.4471	-0.481815	0.0387723
ENSMUSG00000031343	Gabra3	69.4171	68.1946	95.8371	52.5826	40.6245	56.1226	43.8579	59.8801	71.5079	50.1213	0.525608	0.0388959
ENSMUSG00000064372	mt-Tp	1465.47	1725.04	1106.33	1336.48	1721.24	1438.95	1748.34	2181.35	1408.33	1772.47	-0.331458	0.0389112
ENSMUSG00000024824	Rad9a	3.30558	1.92098	5.88473	7.6683	5.29885	34.0416	3.98708	10.9984	4.6949	13.5815	-1.53879	0.0389646
ENSMUSG00000070034	Sp110	52.8892	63.3922	92.4744	51.4872	37.9751	44.162	55.8191	40.3274	65.0607	44.5709	0.554386	0.0389977
ENSMUSG00000086292	Gm16052	1.10186	0.960488	0	0	2.64942	1.84009	4.98385	4.88817	0.515587	3.59038	-2.82785	0.0390174
ENSMUSG00000059810	Rgs3	323.946	199.781	380.826	193.898	275.54	426.9	383.757	433.825	274.613	380.005	-0.465952	0.0391741
ENSMUSG00000109784	Gm45493	1.10186	1.92098	1.68135	6.57283	0	0	0.99677	0	2.81925	0.249193	3.20805	0.0392021
ENSMUSG00000069668	Sult3a1	0	10.5654	2.52203	1.09547	7.94827	7.36034	19.9354	9.77635	3.54572	11.2551	-1.63739	0.039367
ENSMUSG00000026628	Atf3	174.094	171.927	149.64	130.361	97.1456	144.447	100.674	135.647	156.506	119.478	0.392458	0.0393999
ENSMUSG00000090925	1810064F22Rik	42.9725	44.1824	35.3084	37.246	20.3123	23.0011	37.8773	21.9968	39.9273	25.7968	0.628899	0.0398556
ENSMUSG00000078894	2210418O10Rik	20.9353	30.7356	21.8576	17.5275	6.18199	12.8806	20.9322	8.5543	22.764	12.1373	0.909659	0.0400162
ENSMUSG00000109222	Gm10297	40.7688	61.4712	46.2372	33.9596	55.6379	69.0032	54.8224	89.2092	45.6092	67.1682	-0.545492	0.0401146
ENSMUSG00000025511	Tspan4	1203.23	1251.52	1338.36	1092.19	1287.62	1321.18	1564.93	1625.32	1221.32	1449.76	-0.245935	0.0402246
ENSMUSG00000025289	Prdx4	718.412	944.159	849.083	839.131	941.429	926.483	994.777	1116.95	837.696	994.909	-0.246464	0.0406477
ENSMUSG00000028011	Tdo2	37091.9	41684.2	39048.6	33372.4	43086.7	38559.9	46032.8	50378.7	37799.3	44514.6	-0.235874	0.0406751
ENSMUSG00000107019	Gm43682	15.426	7.6839	3.3627	6.57283	2.64942	3.68017	0.99677	3.66613	8.26136	2.74812	1.57987	0.0406953
ENSMUSG00000074738	Fndc10	74.9264	58.5897	70.6168	79.9694	45.0402	68.0832	51.8321	25.6629	71.0256	47.6546	0.561517	0.0408477
ENSMUSG00000039452	Snx22	6.61115	8.64439	10.9288	14.2411	17.6628	11.0405	13.9548	41.5495	10.1064	21.0519	-1.03723	0.0409303
ENSMUSG00000022947	Cbr3	115.695	107.575	92.4744	121.597	77.7165	100.285	81.7352	26.885	109.335	71.6553	0.597447	0.0410111
ENSMUSG00000024164	C3	126411	104015	97405.8	103346	117297	119201	130193	139111	107794	126451	-0.230293	0.0410431
ENSMUSG00000049037	Clec4a1	57.2967	92.2068	78.1829	50.3917	36.2088	60.7228	57.8127	25.6629	69.5195	45.1018	0.620654	0.041164
ENSMUSG00000024883	Rin1	24.2409	15.3678	18.4949	14.2411	13.2471	2.76013	12.958	6.11022	18.0862	8.76887	1.0327	0.0412791
ENSMUSG00000025351	Cd63	686.458	578.214	730.548	569.645	456.584	667.031	501.375	283.514	641.216	477.126	0.424646	0.0413838
ENSMUSG00000078683	Mup1	42.9725	61.4712	52.1219	37.246	59.1705	22.081	78.7449	595.135	48.4529	188.783	-1.96024	0.0414379
ENSMUSG00000026065	Slc9a4	0	4.80244	6.72541	0	0	0	0	0	2.88196	0	3.9922	0.0417758
ENSMUSG00000041698	Slco1a1	119.001	235.319	255.566	198.28	467.182	150.887	184.403	1719.41	202.042	630.472	-1.64108	0.0418666
ENSMUSG00000075543	Urad	861.654	928.792	629.666	529.113	901.688	898.882	904.071	1047.29	737.306	937.983	-0.346892	0.0419739
ENSMUSG00000049832	Rbx1-ps	1.10186	5.76293	8.40676	3.28641	25.6111	5.52026	7.97416	10.9984	4.63949	12.526	-1.40493	0.0420503
ENSMUSG00000086628	Gm16157	282.076	416.852	334.589	249.768	409.778	355.136	417.647	444.824	320.821	406.846	-0.339579	0.0421321
ENSMUSG00000031443	F7	1706.78	1611.7	1472.86	1465.74	1707.11	1653.32	1892.87	2075.03	1564.27	1832.08	-0.227475	0.0422522
ENSMUSG00000039519	Cyp7b1	785.625	742.457	869.259	869.804	898.155	763.635	1508.11	2511.3	816.786	1420.3	-0.797724	0.0422898
ENSMUSG00000040389	Wdr47	65.0097	47.0639	39.5118	47.1053	31.7931	34.9616	37.8773	30.5511	49.6727	33.7958	0.546411	0.0424216
ENSMUSG00000070407	Hs3st3b1	1448.94	1359.09	1602.33	1473.41	1627.63	1868.61	1590.85	1705.97	1470.94	1698.26	-0.207051	0.0424955
ENSMUSG00000005514	Por	11939.7	9059.32	12682.4	9343.28	14762.6	11427.8	13942.8	12237.5	10756.2	13092.7	-0.283582	0.0425954
ENSMUSG00000024807	Syvn1	1613.12	1123.77	1009.65	1650.88	1318.53	1540.15	1660.62	2980.56	1349.35	1874.97	-0.474382	0.0427262
ENSMUSG00000109194	Gm44570	4.40743	4.80244	5.88473	4.38189	1.76628	1.84009	0.99677	0	4.86912	1.15078	2.01565	0.0427262
ENSMUSG00000106157	4930555A03Rik	0	2.88146	4.20338	2.19094	0	0	0	0	2.31895	0	3.6758	0.0429326
ENSMUSG00000033107	Rnf125	819.783	872.123	996.201	1157.91	742.722	748.915	953.909	673.346	961.505	779.723	0.30182	0.042938
ENSMUSG00000004707	Ly9	94.7598	105.654	147.959	100.783	99.795	89.2441	71.7675	72.1006	112.289	83.2268	0.432306	0.0431871
ENSMUSG00000022750	Klhl22	460.577	404.365	403.525	445.857	529.002	481.182	493.401	496.15	428.581	499.934	-0.224132	0.043239
ENSMUSG00000030402	Ppm1n	2.20372	5.76293	2.52203	3.28641	0	0.920043	0.99677	0	3.44377	0.479203	2.78782	0.0432779
ENSMUSG00000108472	Gm45212	4.40743	3.84195	1.68135	7.6683	2.64942	0	0	0	4.39976	0.662356	2.60977	0.0432828
ENSMUSG00000036931	Nfkbid	30.852	13.4468	26.9016	36.1506	10.5977	14.7207	19.9354	15.8866	26.8378	15.2851	0.812436	0.0436614
ENSMUSG00000020258	Glyctk	3114.95	2782.53	2995.33	2935.86	3154.58	3352.64	3253.46	3781	2957.17	3385.42	-0.194772	0.0437495
ENSMUSG00000093933	Gm25526	0	0	0	0	2.64942	0	2.99031	3.66613	0	2.32647	-3.65784	0.0442505
ENSMUSG00000022824	Muc13	2.20372	1.92098	22.6983	0	0	0	0	0	6.70574	0	5.19681	0.0442595
ENSMUSG00000069041	Slc25a31	0	0	0	0	2.64942	0	1.99354	19.5527	0	6.04891	-5.04107	0.0442809
ENSMUSG00000038648	Creb3l2	388.956	350.578	390.074	372.46	407.128	480.262	368.805	668.458	375.517	481.163	-0.354985	0.044411
ENSMUSG00000001131	Timp1	61.7041	45.1429	65.5727	40.5324	42.3908	35.8817	41.8644	13.4425	53.238	33.3948	0.659446	0.0445758
ENSMUSG00000103227	Gm37733	2.20372	1.92098	1.68135	2.19094	0	0	0	0	1.99925	0	3.44176	0.0446078
ENSMUSG00000049409	Prokr1	13.2223	8.64439	6.72541	8.76377	2.64942	3.68017	2.99031	6.11022	9.33897	3.85753	1.29727	0.0446183
ENSMUSG00000065954	Tacc1	882.589	716.524	636.392	572.932	718.877	710.273	919.022	1454.23	702.109	950.601	-0.436004	0.0446254
ENSMUSG00000093916	Gm379	1.10186	6.72341	0.840676	1.09547	4.41571	2.76013	8.97093	18.3306	2.44036	8.61935	-1.78593	0.0447354
ENSMUSG00000030787	Lyve1	502.448	437.022	495.158	461.194	351.49	434.26	445.556	344.616	473.955	393.981	0.265431	0.0447372
ENSMUSG00000111264	E030022I16Rik	12.1204	10.5654	5.88473	13.1457	4.41571	3.68017	4.98385	4.88817	10.4291	4.49198	1.20808	0.045016
ENSMUSG00000022032	Scara5	113.491	61.4712	36.1491	52.5826	40.6245	122.366	97.6835	591.469	65.9236	213.036	-1.69194	0.0450193
ENSMUSG00000088456	Gm26372	5.50929	1.92098	0	2.19094	0	0	0	0	2.4053	0	3.69457	0.0450314
ENSMUSG00000050335	Lgals3	650.097	635.843	932.31	683.574	581.99	682.672	599.059	397.164	725.456	565.221	0.359239	0.0451195
ENSMUSG00000113878	Gm19045	2.20372	1.92098	0	5.47736	0	0	0	0	2.40051	0	3.69222	0.0452245
ENSMUSG00000006736	Tspan31	4799.7	4459.54	4228.6	4540.73	5433.97	5194.56	4603.09	5325.66	4507.14	5139.32	-0.189522	0.0453132
ENSMUSG00000056394	Lig1	79.3338	77.7995	118.535	95.306	87.431	66.2431	66.7836	37.8833	92.7437	64.5853	0.514202	0.0455044
ENSMUSG00000045934	Mtmr11	70.519	65.3132	63.8914	94.2106	45.0402	60.7228	62.7965	14.6645	73.4835	45.806	0.667654	0.0455211
ENSMUSG00000039917	Rhbdd2	490.327	449.508	485.07	510.49	553.73	571.346	570.153	538.921	483.849	558.538	-0.208254	0.0456334
ENSMUSG00000060260	Pwwp2b	2.20372	5.76293	5.04406	2.19094	4.41571	34.0416	3.98708	4.88817	3.80041	11.8331	-1.62966	0.0459553
ENSMUSG00000029247	Paics	3768.36	3699.8	3068.47	3315.99	3733.04	3585.41	4051.87	5904.91	3463.15	4318.81	-0.318253	0.0459655
ENSMUSG00000024737	Slc15a3	515.67	449.508	617.897	518.158	450.402	500.503	411.666	337.284	525.308	424.964	0.304146	0.0460498
ENSMUSG00000020053	Igf1	7194.04	7612.83	6123.48	6508.2	7039.52	6928.84	9898.93	9624.81	6859.64	8373.03	-0.287511	0.0461258
ENSMUSG00000066366	Serpina1a	17014.9	19083.9	17372.6	18940.7	18397.6	18119.3	23428.1	29683.4	18103	22407.1	-0.307652	0.0461712
ENSMUSG00000106457	Gm42585	3.30558	2.88146	1.68135	2.19094	0.883142	0	0	0	2.51483	0.220785	3.04872	0.046537
ENSMUSG00000022849	Hspbap1	81.5375	82.6019	58.8473	52.5826	47.6896	51.5224	43.8579	54.9919	68.8924	49.5155	0.478265	0.0465946
ENSMUSG00000094158	Gm23264	0	0.960488	0	0	0.883142	1.84009	6.97739	1.22204	0.240122	2.73067	-3.18099	0.0466412
ENSMUSG00000030559	Rab38	5.50929	12.4863	5.88473	9.85924	16.7797	14.7207	16.9451	15.8866	8.4349	16.083	-0.933827	0.0467079
ENSMUSG00000101188	Eif4a-ps4	1204.33	1176.6	1145	1159.01	1354.74	1236.54	1298.79	1445.68	1171.23	1333.94	-0.187135	0.0467763
ENSMUSG00000113642	CT030170.6	9.91673	3.84195	0	3.28641	0	0	1.99354	0	4.26127	0.498385	3.05419	0.0469321
ENSMUSG00000051147	Nat2	271.057	317.921	327.023	243.195	363.854	336.736	339.899	360.503	289.799	350.248	-0.269838	0.0470224
ENSMUSG00000026117	Zap70	347.085	484.086	500.202	469.957	549.314	547.425	512.34	565.806	450.333	543.721	-0.269826	0.0472139
ENSMUSG00000038141	Tmem181a	179.603	166.164	136.19	136.934	119.224	113.165	144.532	107.54	154.723	121.115	0.349896	0.0472577
ENSMUSG00000085614	1700123M08Rik	0	0	0.840676	0	2.64942	1.84009	2.99031	2.44409	0.210169	2.48098	-3.0406	0.0472869
ENSMUSG00000097372	Gm26876	0	0	0	0	2.64942	0.920043	0.99677	3.66613	0	2.05809	-3.47897	0.047766
ENSMUSG00000026589	Sec16b	2388.83	2221.61	2184.08	2344.31	2492.23	2474.91	2739.12	2598.06	2284.71	2576.08	-0.173331	0.0477957
ENSMUSG00000051396	Gm45902	26.4446	20.1702	26.061	23.0049	11.4808	22.081	11.9612	9.77635	23.9202	13.8249	0.777423	0.0478384
ENSMUSG00000038079	Tmem237	109.084	135.429	120.217	170.894	87.431	118.686	100.674	102.652	133.906	102.36	0.386239	0.0479573
ENSMUSG00000040212	Emp3	93.658	112.377	140.393	98.5924	82.1322	81.8838	102.667	68.4344	111.255	83.7794	0.411357	0.0480714
ENSMUSG00000057729	Prtn3	11.0186	15.3678	5.88473	1.09547	5.29885	17.4808	13.9548	48.8817	8.34165	21.404	-1.34025	0.0481154
ENSMUSG00000023272	Creld2	727.227	657.934	507.768	716.438	619.965	805.037	1012.72	2166.68	652.342	1151.1	-0.818981	0.0481611
ENSMUSG00000025036	Sfxn2	1084.23	1035.41	920.54	859.945	1131.3	1095.77	1112.4	1187.83	975.03	1131.82	-0.214968	0.0482192
ENSMUSG00000024424	Ttc39c	3674.7	3867.88	5042.38	3953.56	5161.96	3892.7	5773.29	5394.1	4134.63	5055.51	-0.289793	0.0482889
ENSMUSG00000043110	Lrrn4	19.8335	29.7751	24.3796	23.0049	16.7797	19.3209	12.958	6.11022	24.2483	13.7922	0.791597	0.0483042
ENSMUSG00000110105	Gm45844	6.61115	13.4468	9.24744	12.0502	11.4808	18.4009	27.9096	19.5527	10.3389	19.336	-0.895223	0.0483788
ENSMUSG00000083087	Gm11249	103.575	165.204	172.339	115.025	204.889	186.769	159.483	177.196	139.035	182.084	-0.384275	0.0484019
ENSMUSG00000074865	Zfp934	9.91673	9.60488	10.0881	8.76377	2.64942	1.84009	5.98062	6.11022	9.59337	4.14509	1.24854	0.0485219
ENSMUSG00000080875	Gm7332	61.7041	45.1429	68.9354	79.9694	61.8199	31.2815	21.9289	50.1038	63.938	41.2835	0.630526	0.0486414
ENSMUSG00000108371	Gm38832	3.30558	8.64439	3.3627	4.38189	9.71456	11.0405	9.9677	13.4425	4.92364	11.0413	-1.15471	0.0487671
ENSMUSG00000039765	Cc2d2a	76.0283	87.4044	91.6337	101.879	63.5862	54.2825	86.719	61.1022	89.2363	66.4225	0.426737	0.0489567
ENSMUSG00000087436	Gm16156	0	3.84195	4.20338	1.09547	0	0	0	0	2.2852	0	3.65783	0.0491196
ENSMUSG00000107906	Gm5580	4.40743	1.92098	0.840676	1.09547	0	0	0	0	2.06614	0	3.48001	0.0491316
ENSMUSG00000083650	Gm13357	2.20372	0.960488	2.52203	2.19094	0	0	0	0	1.96929	0	3.42439	0.0493481
ENSMUSG00000022514	Il1rap	2373.4	2381.05	2234.52	2371.7	2516.95	2343.35	2853.75	3426.61	2340.17	2785.17	-0.250622	0.049461
ENSMUSG00000085982	9530051G07Rik	3.30558	2.88146	0.840676	1.09547	0	0	0	0	2.0308	0	3.46046	0.0494655
ENSMUSG00000104777	Gm4865	2.20372	2.88146	1.68135	1.09547	0	0	0	0	1.9655	0	3.42332	0.0494959
ENSMUSG00000021876	Rnase4	13108.8	14229.6	13852.7	13536.7	14457.9	12788.6	16984	26269	13682	17624.9	-0.365238	0.0495036
ENSMUSG00000024966	Stip1	1876.47	1754.81	1692.28	1418.64	1942.91	1920.13	1727.4	2703.16	1685.55	2073.4	-0.298087	0.0495487
ENSMUSG00000050075	Gpr171	0	0	1.68135	0	5.29885	1.84009	3.98708	2.44409	0.420338	3.39253	-2.82639	0.049622
ENSMUSG00000043336	Filip1l	146.547	154.639	147.118	161.034	90.9636	122.366	122.603	145.423	152.335	120.339	0.346616	0.049695
ENSMUSG00000083261	Gm7816	70.519	61.4712	56.3253	71.2057	80.3659	74.5235	95.69	91.6532	64.8803	85.5581	-0.401116	0.0497798
ENSMUSG00000026536	Ifi211	83.7413	78.76	95.8371	69.0147	40.6245	69.0032	70.7707	58.6581	81.8383	59.7641	0.459291	0.0498202
ENSMUSG00000043782	Bicdl2	11.0186	0.960488	2.52203	4.38189	0.883142	0.920043	0.99677	1.22204	4.72075	1.0055	2.22371	0.049854

## Sheet: table S4
Table S4. GO analysis of the DEGs
Category	GOID	Description	GeneRatio	BgRatio	pvalue	geneID	geneName	Count
BP	GO:1904018	positive regulation of vasculature development	10/139	148/15728	7.59e-07	ENSMUSG00000036585/ENSMUSG00000020484/ENSMUSG00000072625/ENSMUSG00000028179/ENSMUSG00000019579/ENSMUSG00000030790/ENSMUSG00000025810/ENSMUSG00000029648/ENSMUSG00000062960/ENSMUSG00000024164	Fgf1/Xbp1/Gdf2/Cth/Mydgf/Adm/Nrp1/Flt1/Kdr/C3	10
BP	GO:1901605	alpha-amino acid metabolic process	9/139	176/15728	2.64241e-05	ENSMUSG00000022129/ENSMUSG00000030934/ENSMUSG00000028179/ENSMUSG00000039648/ENSMUSG00000048087/ENSMUSG00000057228/ENSMUSG00000027597/ENSMUSG00000025289/ENSMUSG00000028011	Dct/Oat/Cth/Kyat1/Gm4737/Aadat/Ahcy/Prdx4/Tdo2	9
BP	GO:0045940	positive regulation of steroid metabolic process	4/139	23/15728	4.54009e-05	ENSMUSG00000036585/ENSMUSG00000024378/ENSMUSG00000032083/ENSMUSG00000005514	Fgf1/Stard4/Apoa1/Por	4
BP	GO:0006520	cellular amino acid metabolic process	10/139	242/15728	5.80351e-05	ENSMUSG00000022129/ENSMUSG00000030934/ENSMUSG00000028179/ENSMUSG00000039648/ENSMUSG00000057880/ENSMUSG00000048087/ENSMUSG00000057228/ENSMUSG00000027597/ENSMUSG00000025289/ENSMUSG00000028011	Dct/Oat/Cth/Kyat1/Abat/Gm4737/Aadat/Ahcy/Prdx4/Tdo2	10
BP	GO:0006694	steroid biosynthetic process	7/139	121/15728	9.88417e-05	ENSMUSG00000036585/ENSMUSG00000006517/ENSMUSG00000024378/ENSMUSG00000030382/ENSMUSG00000032083/ENSMUSG00000039519/ENSMUSG00000005514	Fgf1/Mvd/Stard4/Slc27a5/Apoa1/Cyp7b1/Por	7
BP	GO:0046890	regulation of lipid biosynthetic process	7/139	123/15728	0.000109571	ENSMUSG00000078673/ENSMUSG00000025353/ENSMUSG00000036585/ENSMUSG00000024378/ENSMUSG00000032083/ENSMUSG00000024164/ENSMUSG00000005514	Mup19/Ormdl2/Fgf1/Stard4/Apoa1/C3/Por	7
BP	GO:0001676	long-chain fatty acid metabolic process	6/139	86/15728	0.000112563	ENSMUSG00000024292/ENSMUSG00000042248/ENSMUSG00000092008/ENSMUSG00000054827/ENSMUSG00000030382/ENSMUSG00000018796	Cyp4f14/Cyp2c37/Cyp2c69/Cyp2c50/Slc27a5/Acsl1	6
BP	GO:0006084	acetyl-CoA metabolic process	4/139	30/15728	0.000133926	ENSMUSG00000031767/ENSMUSG00000006517/ENSMUSG00000057228/ENSMUSG00000028011	Nudt7/Mvd/Aadat/Tdo2	4
BP	GO:0006695	cholesterol biosynthetic process	4/139	39/15728	0.000377949	ENSMUSG00000036585/ENSMUSG00000006517/ENSMUSG00000032083/ENSMUSG00000005514	Fgf1/Mvd/Apoa1/Por	4
BP	GO:0006699	bile acid biosynthetic process	3/139	17/15728	0.000419487	ENSMUSG00000024378/ENSMUSG00000030382/ENSMUSG00000039519	Stard4/Slc27a5/Cyp7b1	3
BP	GO:0019216	regulation of lipid metabolic process	9/139	269/15728	0.000648506	ENSMUSG00000078673/ENSMUSG00000025353/ENSMUSG00000036585/ENSMUSG00000024378/ENSMUSG00000029648/ENSMUSG00000020644/ENSMUSG00000032083/ENSMUSG00000024164/ENSMUSG00000005514	Mup19/Ormdl2/Fgf1/Stard4/Flt1/Id2/Apoa1/C3/Por	9
BP	GO:0010889	regulation of sequestering of triglyceride	2/124	12/15728	0.0038645	ENSMUSG00000024526/ENSMUSG00000015568	Cidea/Lpl	2
CC	GO:0072562	blood microparticle	8/145	161/15943	0.000112266	ENSMUSG00000022797/ENSMUSG00000022347/ENSMUSG00000023176/ENSMUSG00000037493/ENSMUSG00000015083/ENSMUSG00000032083/ENSMUSG00000029369/ENSMUSG00000024164	Tfrc/A1bg/Cpn2/Cib2/C8g/Apoa1/Afm/C3	8
CC	GO:0042470	melanosome	5/145	93/15943	0.00158866	ENSMUSG00000022129/ENSMUSG00000022797/ENSMUSG00000048087/ENSMUSG00000027597/ENSMUSG00000030559	Dct/Tfrc/Gm4737/Ahcy/Rab38	5
CC	GO:0001726	ruffle	6/126	150/15943	0.00122371	ENSMUSG00000040268/ENSMUSG00000034593/ENSMUSG00000027907/ENSMUSG00000032231/ENSMUSG00000023905/ENSMUSG00000006154	Plekha1/Myo5a/S100a11/Anxa2/Tnfrsf12a/Eps8l1	6
CC	GO:0031252	cell leading edge	9/126	334/15943	0.0013432	ENSMUSG00000040268/ENSMUSG00000034593/ENSMUSG00000027907/ENSMUSG00000032231/ENSMUSG00000023905/ENSMUSG00000006154/ENSMUSG00000022995/ENSMUSG00000062991/ENSMUSG00000040724	Plekha1/Myo5a/S100a11/Anxa2/Tnfrsf12a/Eps8l1/Enah/Nrg1/Kcna2	9
CC	GO:0048770	pigment granule	5/145	93/15943	0.00158866	ENSMUSG00000022129/ENSMUSG00000022797/ENSMUSG00000048087/ENSMUSG00000027597/ENSMUSG00000030559	Dct/Tfrc/Gm4737/Ahcy/Rab38	5
CC	GO:0048500	signal recognition particle	2/145	11/15943	0.00428156	ENSMUSG00000112449/ENSMUSG00000009092	Srp54a/Derl3	2
CC	GO:0098802	plasma membrane receptor complex	5/126	139/15943	0.00492968	ENSMUSG00000070369/ENSMUSG00000040592/ENSMUSG00000062157/ENSMUSG00000040998/ENSMUSG00000025006	Itgad/Cd79b/Ifnlr1/Npnt/Sorbs1	5
CC	GO:0005811	lipid particle	3/126	62/15943	0.0129893	ENSMUSG00000024526/ENSMUSG00000002831/ENSMUSG00000032231	Cidea/Plin4/Anxa2	3
CC	GO:0046930	pore complex	2/145	24/15943	0.0198905	ENSMUSG00000029656/ENSMUSG00000015083	C8b/C8g	2
CC	GO:0005790	smooth endoplasmic reticulum	2/145	27/15943	0.0248518	ENSMUSG00000025289/ENSMUSG00000024807	Prdx4/Syvn1	2
MF	GO:0008395	steroid hydroxylase activity	4/143	46/15590	0.000821317	ENSMUSG00000042248/ENSMUSG00000092008/ENSMUSG00000054827/ENSMUSG00000039519	Cyp2c37/Cyp2c69/Cyp2c50/Cyp7b1	4
MF	GO:0015485	cholesterol binding	3/143	34/15590	0.00367232	ENSMUSG00000024378/ENSMUSG00000032083/ENSMUSG00000079608	Stard4/Apoa1/Stard6	3
MF	GO:0004467	long-chain fatty acid-CoA ligase activity	2/143	13/15590	0.00609906	ENSMUSG00000030382/ENSMUSG00000018796	Slc27a5/Acsl1	2
MF	GO:0017127	cholesterol transporter activity	2/143	17/15590	0.0103823	ENSMUSG00000024378/ENSMUSG00000032083	Stard4/Apoa1	2
MF	GO:0015248	sterol transporter activity	2/143	19/15590	0.012899	ENSMUSG00000024378/ENSMUSG00000032083	Stard4/Apoa1	2
MF	GO:0005319	lipid transporter activity	4/143	110/15590	0.0185419	ENSMUSG00000024378/ENSMUSG00000021135/ENSMUSG00000030382/ENSMUSG00000032083	Stard4/Slc10a1/Slc27a5/Apoa1	4
MF	GO:0070325	lipoprotein particle receptor binding	2/143	24/15590	0.0202076	ENSMUSG00000028410/ENSMUSG00000032083	Dnaja1/Apoa1	2
MF	GO:0030246	carbohydrate binding	6/120	245/15590	0.0117063	ENSMUSG00000037280/ENSMUSG00000029915/ENSMUSG00000056481/ENSMUSG00000026580/ENSMUSG00000049037/ENSMUSG00000050335	Galnt6/Clec5a/Cd248/Selp/Clec4a1/Lgals3	6
MF	GO:0051020	GTPase binding	6/120	300/15590	0.0285099	ENSMUSG00000034593/ENSMUSG00000032231/ENSMUSG00000040247/ENSMUSG00000071497/ENSMUSG00000024883/ENSMUSG00000043782	Myo5a/Anxa2/Tbc1d10c/Nutf2-ps1/Rin1/Bicdl2	6
MF	GO:0015144	carbohydrate transmembrane transporter activity	2/120	41/15590	0.0396421	ENSMUSG00000027661/ENSMUSG00000028427	Slc2a10/Aqp7	2

## Sheet: table S5
Table S5. KEGG analysis of the DEGs
KEGGID	Description	GeneRatio	BgRatio	pvalue	geneID	geneName	keggID	Count
mmu04610	Complement and coagulation cascades	9/123	85/6129	4.49e-05	ENSMUSG00000071177/ENSMUSG00000071178/ENSMUSG00000079015/ENSMUSG00000029656/ENSMUSG00000031538/ENSMUSG00000015083/ENSMUSG00000024164/ENSMUSG00000031443/ENSMUSG00000066366	Serpina1d/Serpina1b/Serpina1c/C8b/Plat/C8g/C3/F7/Serpina1a	mmu:20703/mmu:20701/mmu:20702/mmu:110382/mmu:18791/mmu:69379/mmu:12266/mmu:14068/mmu:20700	9
mmu03320	PPAR signaling pathway	8/123	78/6129	0.000151615	ENSMUSG00000002831/ENSMUSG00000028240/ENSMUSG00000015568/ENSMUSG00000028427/ENSMUSG00000030382/ENSMUSG00000025006/ENSMUSG00000018796/ENSMUSG00000032083	Plin4/Cyp7a1/Lpl/Aqp7/Slc27a5/Sorbs1/Acsl1/Apoa1	mmu:57435/mmu:13122/mmu:16956/mmu:11832/mmu:26459/mmu:20411/mmu:14081/mmu:11806	8
mmu05204	Chemical carcinogenesis	8/123	85/6129	0.000276806	ENSMUSG00000042248/ENSMUSG00000016194/ENSMUSG00000035780/ENSMUSG00000054827/ENSMUSG00000039648/ENSMUSG00000030711/ENSMUSG00000057425/ENSMUSG00000051147	Cyp2c37/Hsd11b1/Ugt2a3/Cyp2c50/Kyat1/Sult1a1/Ugt2b37/Nat2	mmu:13096/mmu:15483/mmu:72094/mmu:107141/mmu:70266/mmu:20887/mmu:112417/mmu:17961	8
mmu00140	Steroid hormone biosynthesis	7/123	74/6129	0.000652597	ENSMUSG00000042248/ENSMUSG00000016194/ENSMUSG00000028240/ENSMUSG00000035780/ENSMUSG00000054827/ENSMUSG00000057425/ENSMUSG00000039519	Cyp2c37/Hsd11b1/Cyp7a1/Ugt2a3/Cyp2c50/Ugt2b37/Cyp7b1	mmu:13096/mmu:15483/mmu:13122/mmu:72094/mmu:107141/mmu:112417/mmu:13123	7
mmu00120	Primary bile acid biosynthesis	3/123	16/6129	0.00364892	ENSMUSG00000028240/ENSMUSG00000030382/ENSMUSG00000039519	Cyp7a1/Slc27a5/Cyp7b1	mmu:13122/mmu:26459/mmu:13123	3
mmu04976	Bile secretion	5/123	69/6129	0.0121215	ENSMUSG00000028240/ENSMUSG00000021135/ENSMUSG00000067144/ENSMUSG00000030382/ENSMUSG00000041698	Cyp7a1/Slc10a1/Slc22a7/Slc27a5/Slco1a1	mmu:13122/mmu:20493/mmu:108114/mmu:26459/mmu:28248	5
mmu04141	Protein processing in endoplasmic reticulum	8/123	157/6129	0.0132705	ENSMUSG00000025887/ENSMUSG00000019927/ENSMUSG00000020484/ENSMUSG00000028410/ENSMUSG00000032115/ENSMUSG00000009092/ENSMUSG00000041355/ENSMUSG00000024807	Casp12/Ube2d1/Xbp1/Dnaja1/Hyou1/Derl3/Ssr2/Syvn1	mmu:12364/mmu:216080/mmu:22433/mmu:15502/mmu:12282/mmu:70377/mmu:66256/mmu:74126	8
mmu00330	Arginine and proline metabolism	3/123	46/6129	0.0641707	ENSMUSG00000030934/ENSMUSG00000027333/ENSMUSG00000056162	Oat/Smox/Cndp1	mmu:18242/mmu:228608/mmu:338403	3
mmu04060	Cytokine-cytokine receptor interaction	8/123	215/6129	0.0665913	ENSMUSG00000054263/ENSMUSG00000023905/ENSMUSG00000040899/ENSMUSG00000062157/ENSMUSG00000029648/ENSMUSG00000062960/ENSMUSG00000028362/ENSMUSG00000022514	Lifr/Tnfrsf12a/Ccr6/Ifnlr1/Flt1/Kdr/Tnfsf8/Il1rap	mmu:16880/mmu:27279/mmu:12458/mmu:242700/mmu:14254/mmu:16542/mmu:21949/mmu:16180	8
mmu00590	Arachidonic acid metabolism	4/123	77/6129	0.0683026	ENSMUSG00000024292/ENSMUSG00000042248/ENSMUSG00000054827/ENSMUSG00000022947	Cyp4f14/Cyp2c37/Cyp2c50/Cbr3	mmu:64385/mmu:13096/mmu:107141/mmu:109857	4
mmu04979	Cholesterol metabolism	3/123	49/6129	0.0746408	ENSMUSG00000028240/ENSMUSG00000015568/ENSMUSG00000032083	Cyp7a1/Lpl/Apoa1	mmu:13122/mmu:16956/mmu:11806	3
mmu00830	Retinol metabolism	4/123	80/6129	0.0763279	ENSMUSG00000042248/ENSMUSG00000035780/ENSMUSG00000054827/ENSMUSG00000057425	Cyp2c37/Ugt2a3/Cyp2c50/Ugt2b37	mmu:13096/mmu:72094/mmu:107141/mmu:112417	4
mmu00053	Ascorbate and aldarate metabolism	2/123	25/6129	0.0888411	ENSMUSG00000035780/ENSMUSG00000057425	Ugt2a3/Ugt2b37	mmu:72094/mmu:112417	2
mmu04915	Estrogen signaling pathway	4/123	88/6129	0.0999154	ENSMUSG00000027938/ENSMUSG00000019768/ENSMUSG00000024222/ENSMUSG00000038648	Creb3l4/Esr1/Fkbp5/Creb3l2	mmu:78284/mmu:13982/mmu:14229/mmu:208647	4
mmu04142	Lysosome	4/123	122/6129	0.22901	ENSMUSG00000004552/ENSMUSG00000005043/ENSMUSG00000022066/ENSMUSG00000025351	Ctse/Sgsh/Entpd4b/Cd63	mmu:13034/mmu:27029/mmu:100862375/mmu:12512	4
mmu00061	Fatty acid biosynthesis	1/123	13/6129	0.231877	ENSMUSG00000018796	Acsl1	mmu:14081	1
mmu00561	Glycerolipid metabolism	2/123	56/6129	0.310313	ENSMUSG00000015568/ENSMUSG00000020258	Lpl/Glyctk	mmu:16956/mmu:235582	2
mmu04931	Insulin resistance	3/123	104/6129	0.347274	ENSMUSG00000027938/ENSMUSG00000030382/ENSMUSG00000038648	Creb3l4/Slc27a5/Creb3l2	mmu:78284/mmu:26459/mmu:208647	3
mmu04152	AMPK signaling pathway	3/123	117/6129	0.418418	ENSMUSG00000027938/ENSMUSG00000038648/ENSMUSG00000020053	Creb3l4/Creb3l2/Igf1	mmu:78284/mmu:208647/mmu:16000	3
mmu04911	Insulin secretion	2/123	76/6129	0.453399	ENSMUSG00000027938/ENSMUSG00000038648	Creb3l4/Creb3l2	mmu:78284/mmu:208647	2
